# Supplementary material for: Molecular assessment of the fecal microbiota in healthy cats and dogs before and during supplementation with fructo-oligosaccharides (FOS) and inulin using high-throughput 454-pyrosequencing
Source: PeerJ. 2017 Apr 18;5:e3184. doi: 10.7717/peerj.3184 (PMC5398277; doi:10.7717/peerj.3184)
Supplement: Supplemental Information 1 [file peerj-05-3184-s001.xlsx]

## Sheet: cats
Level_1	Level_2	Level_3	Observation Ids	Viyo-C5-2	Viyo-C14-4	Viyo-C11-2	Viyo-C11-3	Viyo-C11-1	Viyo-C12-2	Viyo-C3-2	Viyo-C14-3	Viyo-C12-4	Viyo-C2-2	Viyo-C8-3	Viyo-C2-1	Viyo-C3-4	Viyo-C13-3	Viyo-C13-2	Viyo-C3-3	Viyo-C13-4	Viyo-C3-1	Viyo-C8-1	Viyo-C10-4	Viyo-C10-2	Viyo-C10-3	Viyo-C14-1	Viyo-C10-1	Viyo-C4-1	Viyo-C14-2	Viyo-C12-1	Viyo-C2-4	Viyo-C5-1	Viyo-C2-3	Viyo-C5-4	Viyo-C12-3	Viyo-C13-1	Viyo-C8-2	Viyo-C5-3	Viyo-C8-4	Viyo-C4-2	Viyo-C4-3	Viyo-C4-4	Viyo-C11-4
Metabolism	Xenobiotics Biodegradation and Metabolism	1,1,1-Trichloro-2,2-bis(4-chlorophenyl)ethane (DDT) degradation	1,1,1-Trichloro-2,2-bis(4-chlorophenyl)ethane (DDT) degradation	0	2	0	0	0	0	0	0	2	1	1	6	0	0	0	0	0	4	0	0	2	2	1	1	0	0	0	0	0	0	0	4	0	0	0	0	0	0	0	1
Environmental Information Processing	Membrane Transport	ABC transporters	ABC transporters	297124	57396	63202	97306	106682	94792	119194	50620	53243	111847	127012	90803	173500	86665	61851	171054	87330	501447	232592	58481	49071	39025	58580	39096	112633	86082	89312	160152	154848	132514	107520	81193	105909	154907	99925	119810	99956	172132	121803	123499
Cellular Processes	Cell Communication	Adherens junction	Adherens junction	0	0	0	0	0	0	0	0	0	0	0	0	0	0	0	0	0	0	0	0	0	0	0	0	0	0	0	0	0	0	0	0	0	0	0	0	0	0	0	0
Organismal Systems	Endocrine System	Adipocytokine signaling pathway	Adipocytokine signaling pathway	992	558	267	189	275	207	326	369	294	523	1284	958	508	301	220	453	309	890	904	576	739	487	507	488	856	430	262	250	673	585	453	477	453	666	311	669	38	359	445	371
Human Diseases	Infectious Diseases	African trypanosomiasis	African trypanosomiasis	14	2	1	1	1	1	34	4	6	6	1	6	13	0	7	54	0	82	9	4	3	2	8	0	13	7	2	8	43	6	14	2	0	2	16	0	13	0	0	1
Metabolism	Amino Acid Metabolism	Alanine, aspartate and glutamate metabolism	Alanine, aspartate and glutamate metabolism	92874	16832	16810	24276	26061	23438	30304	14473	15590	32879	37385	30919	41540	22803	16700	44572	22158	127301	69160	17452	16476	12615	17115	12284	31441	23169	25496	37601	44035	39956	30893	22630	28370	48564	28555	33956	28667	43728	33445	30679
Organismal Systems	Excretory System	Aldosterone-regulated sodium reabsorption	Aldosterone-regulated sodium reabsorption	0	0	0	0	0	0	0	0	0	0	0	0	0	0	0	0	0	0	0	0	0	0	0	0	0	0	0	0	0	0	0	0	0	0	0	0	0	0	0	0
Human Diseases	Neurodegenerative Diseases	Alzheimer's disease	Alzheimer's disease	4193	823	834	1116	1133	1432	1530	742	696	1559	1563	1451	2219	1071	781	2122	1024	5873	3161	759	752	605	775	549	1450	1046	1190	2400	1959	1927	1489	991	1285	2235	1380	1540	1464	1983	1490	1389
Metabolism	Amino Acid Metabolism	Amino acid related enzymes	Amino acid related enzymes	135106	23349	24035	34558	36453	33602	47404	20506	22201	48785	51699	45147	60617	32281	24624	68715	31388	187682	101280	24709	23674	18193	24210	17461	46988	32655	36408	55943	63995	59591	47519	32036	40184	70814	43869	50002	45300	63676	48308	43293
Metabolism	Carbohydrate Metabolism	Amino sugar and nucleotide sugar metabolism	Amino sugar and nucleotide sugar metabolism	179458	25192	27249	39237	40141	39272	50880	23991	26481	57695	55613	54665	68836	34159	25951	70618	33279	192544	126840	25533	24077	18916	25699	17787	48045	35329	44925	71337	77198	75410	56787	35650	40679	92129	51430	55847	56306	67287	52172	53424
Genetic Information Processing	Translation	Aminoacyl-tRNA biosynthesis	Aminoacyl-tRNA biosynthesis	112266	18777	19529	27785	28517	27111	39902	17045	18456	40127	41030	37413	50000	25671	20085	56607	25172	148762	83614	19586	18977	14350	19789	13968	38606	26198	30047	47849	52905	50045	40361	25949	31886	59104	36766	41231	38855	51029	38809	34861
Metabolism	Xenobiotics Biodegradation and Metabolism	Aminobenzoate degradation	Aminobenzoate degradation	5985	1655	1578	1507	1835	3413	4981	1560	1093	2883	2946	2611	6342	2070	1917	6431	1789	14831	4385	1269	1347	1176	1296	963	3383	1836	1928	7248	3727	3343	3560	1520	2243	2694	3520	2876	3545	3714	2557	2172
Human Diseases	Infectious Diseases	Amoebiasis	Amoebiasis	392	77	12	51	128	32	191	52	76	115	210	71	270	119	71	208	123	292	259	97	64	22	122	49	141	152	109	93	394	117	106	197	135	201	44	89	16	63	27	75
Human Diseases	Neurodegenerative Diseases	Amyotrophic lateral sclerosis (ALS)	Amyotrophic lateral sclerosis (ALS)	791	130	123	279	271	164	167	85	197	139	284	186	287	212	87	219	180	1303	468	131	115	114	136	85	152	195	257	130	270	201	119	184	163	203	149	145	67	361	206	458
Organismal Systems	Immune System	Antigen processing and presentation	Antigen processing and presentation	4076	677	717	1060	1094	944	520	534	669	1348	1524	1387	942	915	523	866	918	3580	3069	735	709	541	734	504	1120	978	1115	690	1663	1720	1072	958	1171	2232	852	1471	799	1717	1464	1360
Cellular Processes	Cell Growth and Death	Apoptosis	Apoptosis	104	0	20	0	1	4	885	0	0	134	0	3	404	1	198	1202	1	2027	70	0	0	1	0	0	274	0	2	382	276	0	351	0	0	1	494	0	642	247	1	1
Metabolism	Lipid Metabolism	Arachidonic acid metabolism	Arachidonic acid metabolism	678	461	525	519	499	790	979	373	191	642	254	842	890	427	392	1270	458	2878	575	382	611	463	417	299	706	405	385	1292	535	510	594	251	611	514	730	422	909	1177	694	599
Metabolism	Amino Acid Metabolism	Arginine and proline metabolism	Arginine and proline metabolism	108598	19125	18950	27583	30140	29769	32925	16486	18017	38340	44256	34317	49221	27704	18775	47938	26747	141745	82287	19772	17590	13533	19692	13659	35890	27546	29703	45473	50943	47854	35470	26721	33562	57850	31105	40644	30940	50067	39055	33583
Human Diseases	Cardiovascular Diseases	Arrhythmogenic right ventricular cardiomyopathy (ARVC)	Arrhythmogenic right ventricular cardiomyopathy (ARVC)	0	0	0	0	0	0	0	0	0	0	0	0	0	0	0	0	0	0	0	0	0	0	0	0	0	0	0	0	0	0	0	0	0	0	0	0	0	0	0	0
Metabolism	Carbohydrate Metabolism	Ascorbate and aldarate metabolism	Ascorbate and aldarate metabolism	10402	1915	2952	4289	3919	4788	7945	1836	1631	4402	4146	3127	9811	3592	3017	10702	3109	27458	7336	1619	1481	1524	1613	1124	4415	2642	3069	10512	5612	5155	5221	2260	3708	4883	5712	4292	6483	7039	4102	6141
Metabolism	Xenobiotics Biodegradation and Metabolism	Atrazine degradation	Atrazine degradation	798	191	95	103	160	454	379	97	157	281	450	156	587	308	143	429	277	888	589	185	132	87	234	109	289	323	267	227	777	228	222	408	261	421	94	206	26	139	60	134
Cellular Processes	Cell Motility	Bacterial chemotaxis	Bacterial chemotaxis	20831	5859	7419	11811	12614	12674	7062	5011	5226	11503	15215	9578	15532	10489	5753	10851	10300	39749	20265	6224	5443	4198	6145	4594	11920	9543	8510	15613	12480	15042	11148	7804	13536	13301	8432	16589	6227	20530	15327	12530
Human Diseases	Infectious Diseases	Bacterial invasion of epithelial cells	Bacterial invasion of epithelial cells	0	3	0	0	1	1	23	4	0	13	2	8	0	0	0	1	0	30	18	1	1	1	2	1	9	1	0	13	0	4	0	0	0	0	0	0	0	0	0	0
Cellular Processes	Cell Motility	Bacterial motility proteins	Bacterial motility proteins	23992	10974	14366	18832	18568	32247	7561	9343	8193	19634	25678	16898	26604	18339	8391	10113	16612	50642	29053	9240	8918	7650	9738	7755	20442	15745	14011	34156	15266	27905	19938	10869	21993	19212	12940	32185	7608	33236	27569	18688
Environmental Information Processing	Membrane Transport	Bacterial secretion system	Bacterial secretion system	37256	7916	8801	12110	11974	9734	15276	6951	7001	15743	18576	15657	19250	10127	7920	22029	10343	60538	29468	8047	8246	6053	8178	6103	17274	10592	10712	17819	18967	18971	16008	10093	12959	20704	14288	18174	13757	22447	17765	15635
Environmental Information Processing	Signaling Molecules and Interaction	Bacterial toxins	Bacterial toxins	15391	2315	2572	3549	3441	4049	4595	2084	2524	4805	4604	4201	5913	3427	2471	6348	3279	18448	10746	2230	1972	1682	2414	1491	4014	3438	4438	5910	6548	6279	4807	3295	3936	7911	4421	4933	4917	6097	4693	4693
Genetic Information Processing	Transcription	Basal transcription factors	Basal transcription factors	1	0	1	1	1	7	1	0	0	1	0	0	3	3	0	4	1	23	1	0	0	0	0	0	0	1	2	0	0	1	0	0	2	0	0	0	0	2	0	3
Genetic Information Processing	Replication and Repair	Base excision repair	Base excision repair	45450	7019	7238	10817	11267	9511	15271	6577	7104	15484	15944	14432	19628	9580	7575	21785	9588	59042	32647	7351	6928	5243	7492	5163	14171	10031	11724	18622	21273	19316	15550	10136	11893	22929	14207	15887	14788	19192	14608	14167
Metabolism	Xenobiotics Biodegradation and Metabolism	Benzoate degradation	Benzoate degradation	19794	3614	4449	5514	6035	7737	8112	3200	3287	7775	7315	6503	10145	5895	4233	11157	5355	30259	15996	3398	3015	2588	3562	2321	7538	5210	6025	10928	8716	9571	7876	4479	7309	10975	7299	7943	8195	10593	8038	6669
Metabolism	Biosynthesis of Other Secondary Metabolites	Betalain biosynthesis	Betalain biosynthesis	0	0	0	0	0	0	0	0	0	0	0	0	0	0	0	0	0	0	0	0	0	0	0	0	0	0	0	0	0	0	0	0	0	0	0	0	0	0	0	0
Organismal Systems	Digestive System	Bile secretion	Bile secretion	0	0	0	0	0	0	0	0	0	0	0	0	0	0	0	0	0	0	0	0	0	0	0	0	0	0	0	0	0	0	0	0	0	0	0	0	0	0	0	0
Metabolism	Metabolism of Terpenoids and Polyketides	Biosynthesis of 12-, 14- and 16-membered macrolides	Biosynthesis of 12-, 14- and 16-membered macrolides	0	0	0	0	0	0	0	0	0	0	0	0	0	0	0	0	0	0	0	0	0	0	0	0	0	0	0	0	0	0	0	0	0	0	0	0	0	0	0	0
Metabolism	Metabolism of Terpenoids and Polyketides	Biosynthesis of ansamycins	Biosynthesis of ansamycins	11492	2036	2505	3964	4062	3385	3424	1869	2066	4088	4446	3759	5428	3200	2128	5259	3099	17338	8438	2150	1914	1560	2098	1482	3686	3069	3375	4776	5344	4879	3691	2806	3849	5520	3518	4202	3366	6327	4465	5331
Metabolism	Metabolism of Terpenoids and Polyketides	Biosynthesis of siderophore group nonribosomal peptides	Biosynthesis of siderophore group nonribosomal peptides	140	262	96	42	59	430	193	280	51	148	128	274	861	133	81	77	125	534	253	164	224	162	139	132	80	139	75	1375	59	189	36	49	83	121	62	36	27	31	16	62
Metabolism	Metabolism of Terpenoids and Polyketides	Biosynthesis of type II polyketide backbone	Biosynthesis of type II polyketide backbone	0	0	0	0	0	0	0	0	0	0	0	0	0	0	0	0	0	0	0	0	0	0	0	0	0	0	0	0	0	0	0	0	0	0	0	0	0	0	0	0
Metabolism	Metabolism of Terpenoids and Polyketides	Biosynthesis of type II polyketide products	Biosynthesis of type II polyketide products	0	0	0	0	0	0	0	0	0	0	0	0	0	0	0	0	0	0	0	0	0	0	0	0	0	0	0	0	0	0	0	0	0	0	0	0	0	0	0	0
Metabolism	Lipid Metabolism	Biosynthesis of unsaturated fatty acids	Biosynthesis of unsaturated fatty acids	8813	1549	1527	2253	2415	2116	3277	1308	1481	3089	3307	2727	4160	2149	1655	4589	2201	12487	6938	1701	1597	1165	1646	1192	2953	2218	2417	3588	4273	3703	2919	2200	2621	4709	2741	2984	2959	4172	2954	2876
Metabolism	Metabolism of Terpenoids and Polyketides	Biosynthesis of vancomycin group antibiotics	Biosynthesis of vancomycin group antibiotics	2666	838	825	1168	1189	893	1700	775	690	1316	1735	1337	2492	1064	832	2347	1119	5984	2161	888	968	695	876	665	1660	1122	1015	2374	1951	1430	1298	1068	1301	1503	1216	1422	1083	2225	1526	1508
Metabolism	Metabolism of Cofactors and Vitamins	Biotin metabolism	Biotin metabolism	8458	2083	2027	2751	2865	2889	3044	1531	1821	3665	5119	3604	4298	2912	1868	4414	2718	12820	6477	2299	2155	1616	2179	1663	4120	2968	2798	3079	5106	4313	3547	2940	3409	4626	2730	4482	2008	4835	4042	3390
Metabolism	Xenobiotics Biodegradation and Metabolism	Bisphenol degradation	Bisphenol degradation	7004	1260	1235	2090	2408	1457	1481	1106	1217	2016	2664	1995	3345	1901	1173	2463	1950	10201	4822	1243	1053	882	1272	824	1981	1924	1951	2474	3173	2578	1597	1736	2123	2949	1472	2173	1124	3740	2821	3061
Human Diseases	Cancers	Bladder cancer	Bladder cancer	0	1	0	0	0	1	8	0	0	6	0	0	0	0	0	2	0	16	9	0	0	0	0	0	3	0	0	6	0	0	0	0	0	1	0	0	2	0	0	1
Metabolism	Carbohydrate Metabolism	Butanoate metabolism	Butanoate metabolism	44253	10290	12634	15652	16937	19481	19504	8434	8329	19369	20439	16921	26399	15728	10902	27615	13946	78963	37104	9332	9076	7573	9725	6816	20385	13952	14215	26190	21837	23031	18616	11752	19052	25421	17169	20862	17900	28846	22106	19840
Metabolism	Biosynthesis of Other Secondary Metabolites	Butirosin and neomycin biosynthesis	Butirosin and neomycin biosynthesis	7229	1040	894	1441	1653	1265	1680	884	1075	2148	2327	2045	2442	1392	1024	2621	1322	7701	5131	1109	1030	755	1048	813	1740	1453	1711	2026	3009	2896	2035	1406	1642	3695	1870	2157	1984	2804	2177	1802
Metabolism	Carbohydrate Metabolism	C5-Branched dibasic acid metabolism	C5-Branched dibasic acid metabolism	27241	4650	4778	7253	7614	5869	9593	4005	4673	10074	12345	8696	14184	6960	5189	13927	6954	38094	21479	5232	4601	3274	5073	3640	10337	6980	7403	11967	13623	12977	10150	7322	8510	14961	8619	11585	8343	12719	10251	8868
Environmental Information Processing	Signaling Molecules and Interaction	CAM ligands	CAM ligands	0	0	0	0	0	0	0	0	0	0	0	0	0	0	0	0	0	0	0	0	0	0	0	0	0	0	0	0	0	0	0	0	0	0	0	0	0	0	0	0
Metabolism	Biosynthesis of Other Secondary Metabolites	Caffeine metabolism	Caffeine metabolism	0	0	0	0	0	0	0	0	0	0	0	0	0	0	0	0	0	0	0	0	0	0	0	0	0	0	0	0	0	0	0	0	0	0	0	0	0	0	0	0
Environmental Information Processing	Signal Transduction	Calcium signaling pathway	Calcium signaling pathway	0	0	0	0	0	0	0	0	0	0	0	0	0	0	0	0	0	0	0	0	0	0	0	0	0	0	0	0	0	0	0	0	0	0	0	0	0	0	0	0
Metabolism	Xenobiotics Biodegradation and Metabolism	Caprolactam degradation	Caprolactam degradation	486	54	111	250	225	62	981	43	94	313	373	220	704	158	273	1316	95	3018	358	93	76	58	64	56	459	106	97	534	381	310	622	90	153	68	672	428	676	460	202	411
Organismal Systems	Digestive System	Carbohydrate digestion and absorption	Carbohydrate digestion and absorption	2285	120	38	49	38	64	962	160	166	642	449	632	843	9	210	1256	39	2140	1374	139	233	164	96	126	567	58	232	1164	919	987	910	162	8	1038	875	655	1046	402	330	22
Metabolism	Energy Metabolism	Carbon fixation in photosynthetic organisms	Carbon fixation in photosynthetic organisms	57328	10323	10524	16021	17427	15155	18441	9142	9599	19947	22467	18955	28209	14557	10266	27175	13615	81119	41585	10733	10383	8073	10186	7653	19058	13969	15457	26051	26443	25099	19226	13419	17666	28150	17677	21320	17161	26566	20149	21213
Metabolism	Energy Metabolism	Carbon fixation pathways in prokaryotes	Carbon fixation pathways in prokaryotes	71958	15361	17598	22726	23686	24357	25166	12347	13065	29350	32510	27964	34234	21678	14934	36915	20446	108812	57205	15732	16027	12535	15460	11554	29728	20986	21644	31388	34609	35107	26958	19223	26449	40354	24284	31508	24229	41907	33247	28584
Organismal Systems	Circulatory System	Cardiac muscle contraction	Cardiac muscle contraction	0	0	0	0	0	0	0	0	0	0	0	6	3	0	0	0	0	0	0	0	0	0	0	0	0	0	0	0	0	0	0	9	0	2	0	0	0	0	0	0
Metabolism	Metabolism of Terpenoids and Polyketides	Carotenoid biosynthesis	Carotenoid biosynthesis	65	126	49	18	3	3	220	426	6	13	33	16	1964	4	13	31	162	45	22	12	20	19	6	10	49	5	3	3134	68	335	14	4	21	12	6	15	20	89	101	59
Cellular Processes	Cell Growth and Death	Cell cycle	Cell cycle	0	0	0	0	0	0	0	0	0	0	0	0	0	0	0	0	0	0	0	0	0	0	0	0	0	0	0	0	0	0	0	0	0	0	0	0	0	0	0	0
Cellular Processes	Cell Growth and Death	Cell cycle - Caulobacter	Cell cycle - Caulobacter	40895	7847	8034	11928	12168	10851	15763	6744	7203	15420	18135	14703	20423	10537	8115	22959	10417	64155	30934	8414	8284	6296	8035	6097	16143	10666	11439	18239	20041	18836	15646	10514	13087	21051	14313	17599	13774	21008	15942	15479
Cellular Processes	Cell Growth and Death	Cell cycle - yeast	Cell cycle - yeast	0	0	0	0	0	0	0	0	0	0	0	0	0	0	0	0	0	0	0	0	0	0	0	0	0	0	0	0	0	0	0	0	0	0	0	0	0	0	0	0
Environmental Information Processing	Signaling Molecules and Interaction	Cellular antigens	Cellular antigens	874	549	658	533	473	1075	99	377	261	687	593	1202	104	487	250	105	431	865	680	427	706	587	463	389	578	493	481	402	474	502	318	329	536	535	350	268	276	966	740	781
Human Diseases	Infectious Diseases	Chagas disease (American trypanosomiasis)	Chagas disease (American trypanosomiasis)	10	1	0	0	0	1	8	0	0	6	0	0	0	0	0	0	0	16	9	0	0	0	0	0	2	0	0	6	14	2	4	0	0	2	3	0	0	0	0	1
Genetic Information Processing	Folding, Sorting and Degradation	Chaperones and folding catalysts	Chaperones and folding catalysts	74475	14601	13913	20235	21181	19771	26812	12298	12902	27254	30992	26867	35760	18831	13981	38580	18307	107662	55512	15142	15363	11664	14724	10955	27061	19119	20466	32474	36632	32409	25540	18864	23065	38757	23816	27666	23633	35902	26739	26001
Metabolism	Xenobiotics Biodegradation and Metabolism	Chloroalkane and chloroalkene degradation	Chloroalkane and chloroalkene degradation	18824	3140	3571	4826	5324	5285	5335	2750	2938	5875	6359	4765	9171	4688	3132	7622	4459	24809	13706	3191	2679	2279	3135	2058	5760	4590	4979	8382	8785	7452	5092	4397	5342	9065	4561	5882	4621	8400	6750	6595
Metabolism	Xenobiotics Biodegradation and Metabolism	Chlorocyclohexane and chlorobenzene degradation	Chlorocyclohexane and chlorobenzene degradation	2450	142	121	157	142	71	314	249	197	510	428	437	1192	154	118	284	204	577	1667	173	137	95	141	105	276	170	326	1472	899	939	433	333	162	1222	296	384	427	194	285	355
Organismal Systems	Nervous System	Cholinergic synapse	Cholinergic synapse	0	0	0	0	0	0	0	0	0	0	0	0	0	0	0	0	0	0	0	0	0	0	0	0	0	0	0	0	0	0	0	0	0	0	0	0	0	0	0	0
Genetic Information Processing	Replication and Repair	Chromosome	Chromosome	145400	24561	25820	37768	38425	33158	46573	21872	23475	51257	54710	49253	62886	33100	25048	67473	33004	188721	108468	25778	25429	19279	25596	18486	48395	33787	38172	58986	66949	64308	49336	33477	41362	76595	45015	53863	46537	67300	51581	48638
Human Diseases	Cancers	Chronic myeloid leukemia	Chronic myeloid leukemia	0	0	0	0	0	0	0	0	0	0	0	0	0	0	0	0	0	0	0	0	0	0	0	0	0	0	0	0	0	0	0	0	0	0	0	0	0	0	0	0
Organismal Systems	Environmental Adaptation	Circadian rhythm - plant	Circadian rhythm - plant	0	0	0	0	1	4	0	0	0	0	0	0	0	0	0	0	0	3	0	0	0	0	1	0	0	0	2	0	0	1	0	1	1	2	0	0	0	0	0	1
Metabolism	Carbohydrate Metabolism	Citrate cycle (TCA cycle)	Citrate cycle (TCA cycle)	32358	8611	9854	11133	11601	13375	15837	7288	6247	15097	17120	14860	22361	10541	7711	22382	9966	63117	26111	8051	9263	7394	7703	6422	17213	10337	9880	24280	16846	17963	14653	8933	12385	17931	13821	16630	13379	23318	18648	14531
Metabolism	Biosynthesis of Other Secondary Metabolites	Clavulanic acid biosynthesis	Clavulanic acid biosynthesis	0	0	0	0	0	0	0	0	0	0	0	0	0	0	0	0	0	0	0	0	0	0	0	0	0	0	0	0	0	0	0	0	0	0	0	0	0	0	0	0
Human Diseases	Cancers	Colorectal cancer	Colorectal cancer	0	0	0	0	0	0	0	0	0	0	0	0	0	0	0	0	0	0	0	0	0	0	0	0	0	0	0	0	0	0	0	0	0	1	0	0	0	0	0	0
Organismal Systems	Immune System	Complement and coagulation cascades	Complement and coagulation cascades	0	0	0	0	0	0	0	0	0	0	0	0	0	0	0	0	0	0	0	0	0	0	0	0	0	0	0	0	0	0	0	0	0	0	0	0	0	0	0	0
Metabolism	Metabolism of Other Amino Acids	Cyanoamino acid metabolism	Cyanoamino acid metabolism	26240	4559	4454	6866	7313	6341	7855	4294	4426	8785	9965	8348	13466	6323	4537	10959	6534	31164	19871	4627	4143	3291	4571	3201	7685	6429	7361	14134	12273	11223	7742	6437	7919	14143	7328	8090	7670	12397	8858	8710
Metabolism	Amino Acid Metabolism	Cysteine and methionine metabolism	Cysteine and methionine metabolism	91441	15611	17072	23583	23826	25812	29647	13088	14694	32015	32749	29833	37541	21893	15775	42486	20551	118214	67940	15580	15093	11865	15650	11125	28943	21207	24688	35655	41178	39549	30593	20293	26401	48673	28387	31822	30653	41888	31710	29932
Metabolism	Enzyme Families	Cytochrome P450	Cytochrome P450	0	0	0	0	0	0	0	0	0	0	0	0	0	0	0	0	0	0	0	0	0	0	0	0	0	0	0	0	0	0	0	0	0	0	0	0	0	0	0	0
Environmental Information Processing	Signaling Molecules and Interaction	Cytokine receptors	Cytokine receptors	0	0	0	0	0	0	0	0	0	0	0	0	0	0	0	0	0	0	0	0	0	0	0	0	0	0	0	0	0	0	0	0	0	0	0	0	0	0	0	0
Environmental Information Processing	Signaling Molecules and Interaction	Cytokine-cytokine receptor interaction	Cytokine-cytokine receptor interaction	0	0	0	0	0	0	0	0	0	0	0	0	0	0	0	0	0	0	0	0	0	0	0	0	0	0	0	0	0	0	0	0	0	0	0	0	0	0	0	0
Cellular Processes	Cell Motility	Cytoskeleton proteins	Cytoskeleton proteins	33280	6090	6517	10358	10557	7612	8034	5107	5851	11840	14107	11515	13014	8785	5780	12543	8776	40585	25799	6521	5966	4392	6653	4533	11045	8921	9401	9925	15706	14831	10471	8660	11161	18412	8853	13417	8443	16729	13085	13322
Organismal Systems	Immune System	Cytosolic DNA-sensing pathway	Cytosolic DNA-sensing pathway	0	0	0	0	0	0	0	0	0	0	0	0	0	0	0	0	0	0	0	0	0	0	0	0	0	0	0	0	0	0	0	0	0	0	0	0	0	0	0	0
Metabolism	Metabolism of Other Amino Acids	D-Alanine metabolism	D-Alanine metabolism	9182	1800	1873	2436	2489	3441	4906	1616	1540	3676	3490	3225	5376	2287	2021	6756	2134	16468	6753	1626	1611	1306	1670	1202	3774	2258	2588	5697	4770	4267	4075	2088	2695	4678	3994	3754	4298	4666	3253	3091
Metabolism	Metabolism of Other Amino Acids	D-Arginine and D-ornithine metabolism	D-Arginine and D-ornithine metabolism	317	60	17	46	51	30	59	163	73	169	246	272	453	16	11	40	59	244	114	42	52	24	55	44	179	66	87	684	190	315	299	67	15	24	174	367	15	110	171	78
Metabolism	Metabolism of Other Amino Acids	D-Glutamine and D-glutamate metabolism	D-Glutamine and D-glutamate metabolism	12654	2284	2458	3334	3419	3342	4446	1983	2106	4620	4749	4392	5486	3056	2328	6364	2953	17361	9603	2312	2324	1785	2332	1699	4483	3077	3450	5231	5887	5660	4482	2946	3817	6795	4137	4825	4390	6110	4673	4279
Genetic Information Processing	Replication and Repair	DNA repair and recombination proteins	DNA repair and recombination proteins	273031	44928	46898	67975	69638	62277	90535	40285	43377	94524	98426	89259	118286	60633	46659	130086	60224	359547	200760	46870	45682	34981	46586	33393	88954	61962	71199	111965	124997	117837	92408	61675	75218	141156	85351	97568	89545	122220	93225	87757
Genetic Information Processing	Replication and Repair	DNA replication	DNA replication	69391	10712	11630	16977	16745	14968	21968	9675	10731	23761	24187	22789	27618	14428	11265	31621	14387	87765	50239	11254	11047	8465	11221	8079	21639	14895	17693	26767	30676	30238	23792	14851	17828	35862	21843	24963	23113	29732	23044	21929
Genetic Information Processing	Replication and Repair	DNA replication proteins	DNA replication proteins	117343	19427	19718	29445	29529	24921	40027	17279	18699	40238	42851	38891	50677	25306	19987	57741	25325	157699	84954	20410	20121	15184	20091	14683	37842	26253	30100	46852	54213	49870	39921	26366	31609	60098	37404	41809	38963	51168	38283	38580
Human Diseases	Cardiovascular Diseases	Dilated cardiomyopathy (DCM)	Dilated cardiomyopathy (DCM)	0	0	0	0	0	0	0	0	0	0	0	0	0	0	0	0	0	0	0	0	0	0	0	0	0	0	0	0	0	0	0	0	0	0	0	0	0	0	0	0
Metabolism	Xenobiotics Biodegradation and Metabolism	Dioxin degradation	Dioxin degradation	7842	1160	1515	1932	2156	3065	3767	970	1119	2751	2258	1719	3992	2044	1591	5022	1881	12529	6217	1156	863	846	1120	661	2620	1812	2208	4323	3639	3084	2662	1701	2439	4233	2803	2130	3561	3758	2448	2231
Metabolism	Xenobiotics Biodegradation and Metabolism	Drug metabolism - cytochrome P450	Drug metabolism - cytochrome P450	731	279	249	262	418	495	404	376	123	269	286	203	1524	299	218	484	263	2278	656	186	174	195	167	125	370	251	183	2108	366	410	162	143	304	187	208	240	132	478	419	320
Metabolism	Xenobiotics Biodegradation and Metabolism	Drug metabolism - other enzymes	Drug metabolism - other enzymes	27241	5124	5314	7639	8119	7330	11012	4162	4482	9795	10600	9168	12902	6699	5312	15938	6519	42645	20488	5281	5254	4048	5001	3817	9746	6707	7361	11419	12889	11502	9599	6436	8397	14215	9536	9856	10149	13538	9635	10321
Environmental Information Processing	Signaling Molecules and Interaction	ECM-receptor interaction	ECM-receptor interaction	0	0	0	0	0	0	0	0	0	0	0	0	0	0	0	0	0	0	0	0	0	0	0	0	0	0	0	0	0	0	0	0	0	0	0	0	0	0	0	0
Organismal Systems	Excretory System	Endocrine and other factor-regulated calcium reabsorption	Endocrine and other factor-regulated calcium reabsorption	0	0	0	0	0	0	0	0	0	0	0	0	0	0	0	0	0	0	0	0	0	0	0	0	0	0	0	0	0	0	0	0	0	0	0	0	0	0	0	0
Cellular Processes	Transport and Catabolism	Endocytosis	Endocytosis	0	0	0	0	0	0	0	0	0	0	0	0	1	0	0	0	0	0	0	0	0	0	0	0	0	0	0	0	0	0	0	0	0	0	0	0	0	0	0	0
Human Diseases	Infectious Diseases	Epithelial cell signaling in Helicobacter pylori infection	Epithelial cell signaling in Helicobacter pylori infection	8726	1541	1503	2177	2160	1946	2358	1336	1489	3143	3628	3076	3649	2091	1415	3314	2085	9301	6370	1641	1607	1137	1692	1178	2934	2160	2362	3205	4269	4030	2970	2263	2562	4767	2358	3535	2227	3670	3077	2712
Environmental Information Processing	Signal Transduction	ErbB signaling pathway	ErbB signaling pathway	0	0	0	0	0	0	0	0	0	0	0	0	0	0	0	0	0	0	0	0	0	0	0	0	0	0	0	0	0	0	0	0	0	0	0	0	0	0	0	0
Metabolism	Lipid Metabolism	Ether lipid metabolism	Ether lipid metabolism	250	55	78	72	137	86	866	23	31	174	70	27	401	60	137	1191	44	2178	132	67	53	57	36	35	331	57	36	392	291	63	335	29	70	47	477	32	601	393	126	129
Metabolism	Xenobiotics Biodegradation and Metabolism	Ethylbenzene degradation	Ethylbenzene degradation	905	635	883	813	784	1678	1264	576	340	945	1030	929	1989	900	621	1507	813	4068	1095	438	520	495	485	363	1278	701	683	2730	609	1218	1137	394	1003	723	1025	1274	1005	1728	1360	1108
Organismal Systems	Digestive System	Fat digestion and absorption	Fat digestion and absorption	0	0	0	0	0	0	0	0	0	0	0	0	0	0	0	0	0	0	0	0	0	0	0	0	0	0	0	0	0	0	0	0	0	0	0	0	0	0	0	0
Metabolism	Lipid Metabolism	Fatty acid biosynthesis	Fatty acid biosynthesis	48385	7490	8140	11528	11830	11420	18376	6618	7457	16722	17075	14012	22886	11091	8913	25849	11071	66707	37782	8021	7321	5618	7825	5528	16003	10841	12604	22109	21630	21339	16798	10821	13760	26594	15900	16818	18120	21889	16248	13969
Metabolism	Lipid Metabolism	Fatty acid elongation in mitochondria	Fatty acid elongation in mitochondria	0	0	0	0	0	0	0	0	0	0	0	0	0	0	0	0	0	0	0	0	0	0	0	0	0	0	0	0	0	0	0	0	0	0	0	0	0	0	0	0
Metabolism	Lipid Metabolism	Fatty acid metabolism	Fatty acid metabolism	14821	3442	3959	4507	4981	6709	5477	2795	2662	5886	6059	5156	8244	4972	3275	7492	4279	22353	12101	3121	2970	2495	3186	2197	5785	4453	4615	8153	7160	6790	4965	3855	5888	8250	4557	5516	4843	7979	6204	6017
Organismal Systems	Immune System	Fc epsilon RI signaling pathway	Fc epsilon RI signaling pathway	0	0	0	0	0	0	0	0	0	0	0	0	0	0	0	0	0	0	0	0	0	0	0	0	0	0	0	0	0	0	0	0	0	0	0	0	0	0	0	0
Organismal Systems	Immune System	Fc gamma R-mediated phagocytosis	Fc gamma R-mediated phagocytosis	0	0	0	0	0	0	0	0	0	0	0	0	1	0	0	0	0	0	0	0	0	0	0	0	0	0	0	0	0	0	0	0	0	0	0	0	0	0	0	0
Cellular Processes	Cell Motility	Flagellar assembly	Flagellar assembly	7067	4449	5040	6230	5949	15334	3381	4197	2889	7764	11240	6779	14434	6955	2810	3743	5850	19789	9474	3258	3430	3116	3288	3081	8486	5552	4745	20225	5388	12051	9000	3602	7717	5442	5443	14498	1993	10944	9848	5141
Metabolism	Biosynthesis of Other Secondary Metabolites	Flavone and flavonol biosynthesis	Flavone and flavonol biosynthesis	207	74	24	45	70	30	902	52	51	190	124	73	474	7	204	1252	11	2183	214	35	40	11	51	45	334	57	25	424	358	64	379	43	6	195	526	59	674	379	74	13
Metabolism	Biosynthesis of Other Secondary Metabolites	Flavonoid biosynthesis	Flavonoid biosynthesis	256	72	61	36	77	17	20	93	53	76	21	145	32	72	30	22	59	137	22	42	54	35	88	31	61	94	71	36	167	51	56	47	113	18	54	12	1	88	103	84
Metabolism	Xenobiotics Biodegradation and Metabolism	Fluorobenzoate degradation	Fluorobenzoate degradation	0	2	0	0	1	1	14	0	0	12	0	0	5	0	0	0	0	34	18	0	0	0	0	0	4	0	2	11	0	1	0	0	0	5	0	0	0	0	0	0
Cellular Processes	Cell Communication	Focal adhesion	Focal adhesion	0	0	0	0	0	0	0	0	0	0	0	0	0	0	0	0	0	0	0	0	0	0	0	0	0	0	0	0	0	0	0	0	0	0	0	0	0	0	0	0
Metabolism	Metabolism of Cofactors and Vitamins	Folate biosynthesis	Folate biosynthesis	27426	5721	5357	6820	7989	8702	13794	4274	4444	11013	11844	9884	14199	7630	6263	20236	6710	52457	19914	5913	5998	4695	5454	4244	11675	7392	7407	11187	15000	11846	11026	7109	9008	13459	10957	11301	10819	14119	10345	8428
Metabolism	Carbohydrate Metabolism	Fructose and mannose metabolism	Fructose and mannose metabolism	126145	19302	22145	31814	33705	34761	35610	17985	18845	41976	40468	37661	55747	29151	20009	49687	26987	148072	90528	18707	16780	14033	18738	12481	35271	27500	33133	57581	54525	54531	39284	26134	33216	64523	35344	40835	38122	51651	39962	43230
Environmental Information Processing	Signaling Molecules and Interaction	G protein-coupled receptors	G protein-coupled receptors	0	0	1	0	0	5	0	0	0	0	0	0	0	0	0	0	0	0	4	0	0	1	1	0	0	0	3	0	0	0	0	0	0	0	0	0	0	0	0	0
Environmental Information Processing	Signaling Molecules and Interaction	GTP-binding proteins	GTP-binding proteins	0	0	0	0	0	0	0	0	0	0	0	0	0	0	0	0	0	0	0	0	0	0	0	0	0	0	0	0	0	0	0	0	0	0	0	0	0	0	0	0
Metabolism	Carbohydrate Metabolism	Galactose metabolism	Galactose metabolism	86422	12794	13231	20843	21569	18397	33576	12593	13181	28875	30253	25628	44859	17990	14961	46532	17789	119012	61038	13139	11693	9041	12903	9127	26563	18015	21531	45347	41074	36785	30391	18520	21305	43856	28901	28684	31257	36358	25887	27781
Organismal Systems	Digestive System	Gastric acid secretion	Gastric acid secretion	0	0	0	0	0	0	0	0	0	0	0	0	0	0	0	0	0	0	0	0	0	0	0	0	0	0	0	0	0	0	0	0	0	0	0	0	0	0	0	0
Metabolism	Metabolism of Terpenoids and Polyketides	Geraniol degradation	Geraniol degradation	412	214	168	76	90	450	1008	114	95	448	526	510	621	193	272	1304	73	2787	288	150	261	229	149	159	589	145	111	636	392	363	628	104	160	96	680	419	656	404	206	161
Human Diseases	Cancers	Glioma	Glioma	0	0	0	0	0	0	0	0	0	0	0	0	0	0	0	0	0	0	0	0	0	0	0	0	0	0	0	0	0	0	0	0	0	0	0	0	0	0	0	0
Organismal Systems	Nervous System	Glutamatergic synapse	Glutamatergic synapse	7533	1543	1487	2254	2455	2043	2361	1334	1443	2801	3395	2666	3443	2199	1520	3603	2174	10929	5765	1734	1574	1171	1698	1160	2703	2278	2366	2547	4001	3025	2296	2239	2827	3915	2126	2663	1952	3910	2872	2729
Metabolism	Metabolism of Other Amino Acids	Glutathione metabolism	Glutathione metabolism	13112	2504	2735	3485	3594	3548	6543	2431	2054	5100	5126	4859	8267	2974	2770	8860	3001	21944	9658	2399	2641	2057	2339	1807	5431	2988	3372	9285	6567	6183	5443	2939	3864	6642	5350	5161	5779	6861	5057	4608
Environmental Information Processing	Signaling Molecules and Interaction	Glycan bindng proteins	Glycan bindng proteins	0	0	0	0	0	0	0	0	0	0	0	0	0	0	0	0	0	0	0	0	0	0	0	0	0	0	0	0	0	0	0	0	0	0	0	0	0	0	0	0
Metabolism	Lipid Metabolism	Glycerolipid metabolism	Glycerolipid metabolism	38733	6485	8396	12543	12591	10759	16076	5952	6573	14072	15676	11751	21794	10540	7968	22934	10035	64515	29289	6785	6092	4890	6665	4707	14557	9679	10660	20614	18549	17761	14752	9118	12442	19636	13913	15828	14390	21590	15899	16813
Metabolism	Lipid Metabolism	Glycerophospholipid metabolism	Glycerophospholipid metabolism	51609	9048	9352	13590	14234	14035	16079	7716	8493	17701	19603	15629	22667	12931	9111	23238	12392	67853	39480	9191	8307	6507	9181	6365	16164	12665	14300	20611	23599	21704	15938	12408	15967	27507	14733	17698	15427	23321	17467	17232
Metabolism	Amino Acid Metabolism	Glycine, serine and threonine metabolism	Glycine, serine and threonine metabolism	66701	12046	12034	17635	19051	16111	23522	10613	11418	24143	27597	22678	32262	16696	12413	34082	16249	95459	50068	13162	12614	9587	12487	9300	24017	16841	18183	29175	32371	29518	23235	16569	20676	34409	21297	25299	20947	31692	24019	22532
Metabolism	Carbohydrate Metabolism	Glycolysis / Gluconeogenesis	Glycolysis / Gluconeogenesis	138343	19747	20869	29519	31196	32353	41620	18483	20113	43654	41403	38465	58803	28193	21037	58101	26481	159877	101216	19587	17971	14656	19575	13490	37015	27360	34395	62102	57694	58051	42673	26872	33226	71553	39698	41513	44922	52472	40478	38180
Metabolism	Glycan Biosynthesis and Metabolism	Glycosaminoglycan biosynthesis - chondroitin sulfate	Glycosaminoglycan biosynthesis - chondroitin sulfate	0	0	0	0	0	0	0	0	0	0	0	0	0	0	0	0	0	0	0	0	0	0	0	0	0	0	0	0	0	0	0	0	0	0	0	0	0	0	0	0
Metabolism	Glycan Biosynthesis and Metabolism	Glycosaminoglycan degradation	Glycosaminoglycan degradation	5838	787	272	387	429	361	1247	676	922	1306	1344	1878	1153	580	543	1536	486	3451	3495	768	980	718	778	660	768	790	1377	1408	1955	2004	1461	890	614	2893	1411	1033	1609	556	520	753
Metabolism	Glycan Biosynthesis and Metabolism	Glycosphingolipid biosynthesis - ganglio series	Glycosphingolipid biosynthesis - ganglio series	2874	429	164	167	182	133	184	379	389	637	883	1262	516	204	141	153	189	522	1594	484	720	507	383	448	293	307	532	840	823	1010	512	398	219	1314	480	382	449	126	250	450
Metabolism	Glycan Biosynthesis and Metabolism	Glycosphingolipid biosynthesis - globo series	Glycosphingolipid biosynthesis - globo series	7866	1213	909	1527	1558	778	2944	1196	1227	2451	3209	2870	4050	1266	1162	3960	1468	9255	5181	1477	1614	1080	1252	1172	2285	1513	1756	4290	3743	3366	2742	1661	1510	3873	2603	2513	2594	3033	2233	2135
Metabolism	Glycan Biosynthesis and Metabolism	Glycosphingolipid biosynthesis - lacto and neolacto series	Glycosphingolipid biosynthesis - lacto and neolacto series	0	1	0	0	0	0	0	0	0	0	2	1	0	0	0	0	0	0	0	0	0	2	0	0	0	0	0	0	0	0	0	1	0	0	0	0	0	0	0	0
Metabolism	Glycan Biosynthesis and Metabolism	Glycosylphosphatidylinositol(GPI)-anchor biosynthesis	Glycosylphosphatidylinositol(GPI)-anchor biosynthesis	0	0	0	0	0	0	0	0	0	0	0	0	0	0	0	0	0	0	0	0	0	0	0	0	0	0	0	0	0	0	0	0	0	0	0	0	0	0	0	0
Metabolism	Glycan Biosynthesis and Metabolism	Glycosyltransferases	Glycosyltransferases	20782	3988	4046	5142	5198	5367	13672	3609	3391	8840	9477	8134	14134	5026	5118	18639	4824	41339	14838	4149	4543	3500	3949	3088	10234	4965	5232	13808	12598	10031	10403	5084	5952	10013	10183	9157	10464	11293	7824	6723
Metabolism	Carbohydrate Metabolism	Glyoxylate and dicarboxylate metabolism	Glyoxylate and dicarboxylate metabolism	38857	7786	8220	12084	13100	10538	15046	6893	7104	15202	17420	13778	20735	11146	8007	21685	10932	60842	29737	7993	7253	5473	8012	5616	15231	11221	11421	18840	20214	17654	14174	10602	13883	20741	13016	15473	12809	21902	16213	15761
Organismal Systems	Endocrine System	GnRH signaling pathway	GnRH signaling pathway	0	0	0	0	0	0	0	0	0	0	0	0	1	0	0	0	0	0	0	0	0	0	0	0	0	0	0	0	0	0	0	0	0	0	0	0	0	0	0	0
Environmental Information Processing	Signal Transduction	Hedgehog signaling pathway	Hedgehog signaling pathway	0	0	0	0	0	0	0	0	0	0	0	0	0	0	0	0	0	0	0	0	0	0	0	0	0	0	0	0	0	0	0	0	0	0	0	0	0	0	0	0
Organismal Systems	Immune System	Hematopoietic cell lineage	Hematopoietic cell lineage	0	0	0	0	0	0	0	0	0	0	0	0	0	0	0	0	0	0	0	0	0	0	0	0	0	0	0	0	0	0	0	0	0	0	0	0	0	0	0	0
Human Diseases	Infectious Diseases	Hepatitis C	Hepatitis C	0	0	0	0	0	0	0	0	0	0	0	0	0	0	0	0	0	0	0	0	0	0	0	0	0	0	0	0	0	0	0	0	0	0	0	0	0	0	0	0
Metabolism	Amino Acid Metabolism	Histidine metabolism	Histidine metabolism	75766	10236	10888	15823	15807	15738	21459	9219	11121	24570	24353	22498	25971	14279	11089	30713	13513	81187	54114	10617	9659	7492	10828	7506	20531	14523	18599	24857	32389	31730	24261	15155	17698	39726	21904	24445	24169	26661	21029	20116
Genetic Information Processing	Replication and Repair	Homologous recombination	Homologous recombination	89382	14799	15875	22875	23047	20608	29779	13147	14448	31889	32945	30465	37289	20147	15620	43035	19942	118100	66411	15599	15388	11709	15583	11245	30093	20566	23677	35124	40722	39897	31544	20316	25188	47218	28902	33593	30355	40984	31528	29001
Human Diseases	Neurodegenerative Diseases	Huntington's disease	Huntington's disease	940	345	556	717	678	784	1097	283	268	605	571	439	1119	590	464	1427	629	3790	983	246	228	254	311	165	681	516	552	1336	577	583	636	359	684	680	765	546	959	1472	818	945
Human Diseases	Cardiovascular Diseases	Hypertrophic cardiomyopathy (HCM)	Hypertrophic cardiomyopathy (HCM)	0	0	0	0	0	0	0	0	0	0	0	0	0	0	0	0	0	0	0	0	0	0	0	0	0	0	0	0	0	0	0	0	0	0	0	0	0	0	0	0
Metabolism	Biosynthesis of Other Secondary Metabolites	Indole alkaloid biosynthesis	Indole alkaloid biosynthesis	0	0	0	0	0	0	0	0	0	0	0	0	0	0	0	0	0	0	0	0	0	0	0	0	0	0	0	0	0	0	0	0	0	0	0	0	0	0	0	0
Human Diseases	Infectious Diseases	Influenza A	Influenza A	0	0	0	0	0	0	0	0	0	0	0	0	0	0	0	0	0	0	0	0	0	0	0	0	0	0	0	0	0	0	0	0	0	1	0	0	0	0	0	0
Metabolism	Carbohydrate Metabolism	Inositol phosphate metabolism	Inositol phosphate metabolism	8248	1266	1240	1723	2344	1293	3129	1196	1136	2683	2901	2410	4471	1876	1493	4440	1581	11828	5879	1322	1279	951	1209	923	2766	1688	1753	3947	3798	3555	2713	1655	2232	3871	2601	2693	2663	3615	2911	2368
Organismal Systems	Endocrine System	Insulin signaling pathway	Insulin signaling pathway	7897	1105	1063	1808	1844	1293	2029	1059	1136	2384	2896	2200	3562	1457	1082	2958	1529	8873	5547	1222	1110	829	1122	847	2155	1526	1797	3432	3450	3238	2285	1675	1811	3854	2029	2607	1980	2933	2353	2434
Environmental Information Processing	Signaling Molecules and Interaction	Ion channels	Ion channels	4661	203	289	138	126	252	1898	293	360	1269	688	1026	1332	93	470	2537	79	4381	2940	167	227	171	159	154	1092	197	573	1718	1807	1810	1647	373	110	2187	1670	1130	2127	1066	918	292
Metabolism	Biosynthesis of Other Secondary Metabolites	Isoflavonoid biosynthesis	Isoflavonoid biosynthesis	0	0	0	0	0	0	0	0	0	0	0	0	0	0	0	0	0	0	0	0	0	0	0	0	0	0	0	0	0	0	0	0	0	0	0	0	0	0	0	0
Metabolism	Biosynthesis of Other Secondary Metabolites	Isoquinoline alkaloid biosynthesis	Isoquinoline alkaloid biosynthesis	4455	1039	1138	1366	1545	2270	602	650	717	1764	2014	1857	1209	1356	665	1120	1085	5444	3230	941	1036	866	877	731	1574	1223	1251	979	1842	2117	1398	1040	1577	2280	1095	2050	826	2201	2036	1712
Human Diseases	Infectious Diseases	Leishmaniasis	Leishmaniasis	0	0	0	0	0	0	0	0	0	0	0	0	0	0	0	0	0	0	0	0	0	0	0	0	0	0	0	0	0	0	0	0	0	0	0	0	0	0	0	0
Organismal Systems	Immune System	Leukocyte transendothelial migration	Leukocyte transendothelial migration	0	0	0	0	0	0	0	0	0	0	0	0	0	0	0	0	0	0	0	0	0	0	0	0	0	0	0	0	0	0	0	0	0	0	0	0	0	0	0	0
Metabolism	Metabolism of Terpenoids and Polyketides	Limonene and pinene degradation	Limonene and pinene degradation	7707	1239	1409	1772	1794	2910	2840	1110	1151	2574	2470	2283	4228	1892	1321	3854	1588	11928	5149	1016	985	942	1104	739	2274	1623	2062	4570	3222	3557	2850	1382	1836	3476	2618	2975	2663	3409	2693	2506
Metabolism	Lipid Metabolism	Linoleic acid metabolism	Linoleic acid metabolism	3757	969	983	1645	1836	820	1186	860	869	1382	2119	1420	2408	1428	955	1922	1516	7166	2861	1011	877	670	1039	687	1720	1487	1304	1512	2213	1576	1125	1323	1740	1671	989	1656	608	2759	2023	2363
Metabolism	Lipid Metabolism	Lipid biosynthesis proteins	Lipid biosynthesis proteins	44844	7987	7969	11432	11931	11306	16543	6775	7338	16052	18194	14572	21267	10818	8389	23588	10819	63310	35404	8427	8046	6067	8105	6045	15982	10847	11944	20000	20423	20205	15832	10654	13591	24609	14769	16987	15775	21371	16001	14118
Metabolism	Metabolism of Cofactors and Vitamins	Lipoic acid metabolism	Lipoic acid metabolism	464	400	624	549	507	1023	1109	373	167	654	651	474	1317	528	423	1373	543	3251	871	248	286	326	277	229	848	475	379	1974	411	629	592	251	572	616	718	548	919	1296	787	676
Metabolism	Glycan Biosynthesis and Metabolism	Lipopolysaccharide biosynthesis	Lipopolysaccharide biosynthesis	1994	1476	1563	589	312	111	368	1001	752	2472	4721	5292	239	103	145	269	128	1368	964	1451	3141	2235	1111	1796	4682	564	209	858	892	3738	3537	760	119	607	2040	5264	115	2424	4060	1758
Metabolism	Glycan Biosynthesis and Metabolism	Lipopolysaccharide biosynthesis proteins	Lipopolysaccharide biosynthesis proteins	10331	2748	2764	2430	2006	1306	5159	2178	2070	5259	7638	7717	5072	1631	1823	6746	1667	16552	6457	2614	4269	3120	2396	2653	7456	2226	2245	5522	5327	7072	7026	2426	1675	4546	5615	7847	4068	6099	6432	4468
Organismal Systems	Nervous System	Long-term depression	Long-term depression	0	0	0	0	0	0	0	0	0	0	0	0	0	0	0	0	0	0	0	0	0	0	0	0	0	0	0	0	0	0	0	0	0	0	0	0	0	0	0	0
Organismal Systems	Nervous System	Long-term potentiation	Long-term potentiation	0	0	0	0	0	0	0	0	0	0	0	0	0	0	0	0	0	0	0	0	0	0	0	0	0	0	0	0	0	0	0	0	0	0	0	0	0	0	0	0
Metabolism	Amino Acid Metabolism	Lysine biosynthesis	Lysine biosynthesis	85206	13959	14419	21626	22836	21403	25681	11640	13686	28677	32084	25364	35900	20553	14540	37755	19780	110519	64392	14947	13237	10370	14515	10161	26410	20293	22993	31025	38899	35785	26732	20385	24815	44732	24133	29583	24878	36804	28168	27811
Metabolism	Amino Acid Metabolism	Lysine degradation	Lysine degradation	11028	1658	1500	2020	2234	2834	2229	1471	1675	3483	3706	3460	3690	2255	1434	3178	1897	10762	7479	1579	1527	1187	1629	1184	2730	2197	2783	3360	4468	4731	3476	2184	2642	5141	2754	4174	2443	3275	3066	2802
Cellular Processes	Transport and Catabolism	Lysosome	Lysosome	7122	1013	551	836	960	915	1595	836	973	1793	2406	2417	2002	801	704	2225	713	5832	4242	1124	1315	956	947	936	1178	1045	1437	1762	2916	2285	1624	1268	918	3246	1698	1336	1641	1132	845	1449
Environmental Information Processing	Signal Transduction	MAPK signaling pathway	MAPK signaling pathway	0	0	0	0	0	0	0	0	0	0	0	0	0	0	0	0	0	0	0	0	0	0	0	0	0	0	0	0	0	0	0	0	0	0	0	0	0	0	0	0
Environmental Information Processing	Signal Transduction	MAPK signaling pathway - yeast	MAPK signaling pathway - yeast	4412	741	794	1159	1254	1084	1679	752	742	1491	1780	1247	2682	1125	825	2291	1156	6441	3287	754	642	528	741	510	1464	1077	1257	2953	1888	2026	1499	1045	1365	2275	1392	1574	1488	2033	1519	1526
Human Diseases	Infectious Diseases	Measles	Measles	0	0	0	0	0	0	0	0	0	0	0	0	0	0	0	0	0	0	0	0	0	0	0	0	0	0	0	0	0	0	0	0	0	0	0	0	0	0	0	0
Cellular Processes	Cell Growth and Death	Meiosis - yeast	Meiosis - yeast	0	2	0	0	0	0	0	0	2	1	1	5	0	0	0	0	0	3	0	1	2	2	1	1	0	0	0	0	0	0	0	2	0	6	0	0	0	0	0	1
Organismal Systems	Endocrine System	Melanogenesis	Melanogenesis	0	0	0	0	0	0	0	0	0	0	0	0	0	0	0	0	0	0	0	0	0	0	0	0	0	0	0	0	0	0	0	0	0	0	0	0	0	0	0	0
Metabolism	Xenobiotics Biodegradation and Metabolism	Metabolism of xenobiotics by cytochrome P450	Metabolism of xenobiotics by cytochrome P450	707	268	247	243	345	481	401	372	122	268	284	202	1515	271	211	480	253	2225	650	178	170	192	158	124	369	239	174	2101	360	408	161	141	248	186	208	238	132	470	418	297
Metabolism	Energy Metabolism	Methane metabolism	Methane metabolism	119209	20617	22193	34272	36608	30438	34870	18260	20108	40853	45843	35550	57682	31966	21392	51662	30809	161573	90568	22741	19907	15576	21914	15284	37554	30948	33352	51147	56157	50592	35436	30401	38787	62007	32266	41397	32335	55938	41851	43577
Organismal Systems	Digestive System	Mineral absorption	Mineral absorption	170	89	53	82	100	27	59	134	31	43	42	176	431	13	19	36	60	258	85	88	156	100	71	74	45	35	28	650	59	116	23	34	17	9	39	24	18	89	36	226
Genetic Information Processing	Replication and Repair	Mismatch repair	Mismatch repair	77546	13050	14367	21202	21097	18900	26121	11547	12645	27701	29552	26252	34164	18269	13845	37852	18005	107132	56866	13850	13485	10381	13614	9895	26207	18310	20829	31787	36040	34520	27443	18056	22627	39980	25190	30110	25690	36522	27813	27345
Metabolism	Glycan Biosynthesis and Metabolism	N-Glycan biosynthesis	N-Glycan biosynthesis	609	173	100	55	70	30	222	117	116	203	374	341	417	159	109	273	137	426	338	225	290	204	191	182	297	176	116	133	524	213	156	241	125	250	94	151	19	174	145	154
Organismal Systems	Immune System	NOD-like receptor signaling pathway	NOD-like receptor signaling pathway	4077	700	728	1061	1096	947	524	543	674	1354	1543	1397	942	915	526	870	920	3585	3075	741	732	573	738	514	1170	986	1118	695	1663	1729	1072	966	1171	2243	852	1493	799	1717	1465	1365
Metabolism	Xenobiotics Biodegradation and Metabolism	Naphthalene degradation	Naphthalene degradation	12239	2443	3083	3437	3792	5729	4673	2100	1898	4375	4075	3606	7474	3610	2379	6192	3226	19358	9408	2026	1935	1897	2026	1366	4322	3129	3578	9061	5144	5606	4031	2518	3900	6312	3974	4110	4533	6776	5251	4509
Environmental Information Processing	Signaling Molecules and Interaction	Neuroactive ligand-receptor interaction	Neuroactive ligand-receptor interaction	0	0	0	0	0	0	0	0	0	0	0	0	0	0	0	0	0	0	0	0	0	0	0	0	0	0	0	0	0	0	0	0	0	0	0	0	0	0	0	0
Organismal Systems	Nervous System	Neurotrophin signaling pathway	Neurotrophin signaling pathway	0	0	0	0	0	0	0	0	0	0	0	0	0	0	0	0	0	0	0	0	0	0	0	0	0	0	0	0	0	0	0	0	0	0	0	0	0	0	0	0
Metabolism	Metabolism of Cofactors and Vitamins	Nicotinate and nicotinamide metabolism	Nicotinate and nicotinamide metabolism	36751	6528	6589	9371	9714	9215	10682	5562	6281	12828	13972	12642	14264	8514	6110	15634	8161	46062	26865	6777	6793	5196	6658	4952	12256	8820	10002	12438	17071	15683	12016	8793	10363	18705	10735	13682	10432	16604	13048	12335
Metabolism	Energy Metabolism	Nitrogen metabolism	Nitrogen metabolism	58476	10301	10762	15201	15639	15234	17954	8721	9698	20043	23424	19025	26000	13783	9789	25672	13300	75233	43477	10558	10142	7971	10231	7389	19105	13808	15696	23964	27004	24863	18581	13846	16664	29827	16979	20315	16882	26622	20623	20325
Metabolism	Xenobiotics Biodegradation and Metabolism	Nitrotoluene degradation	Nitrotoluene degradation	7741	1791	2076	2978	3359	3658	1783	1198	1570	3151	3765	2385	3445	3031	1586	3001	2520	12414	6326	1877	1548	1293	1826	1219	3015	2791	2627	2049	4198	3511	2345	2527	3367	4191	1838	3608	1346	4675	3779	3556
Genetic Information Processing	Replication and Repair	Non-homologous end-joining	Non-homologous end-joining	182	14	21	58	100	43	30	15	30	27	79	43	82	21	18	54	48	404	192	26	15	16	20	13	23	49	54	16	75	45	28	44	17	29	39	49	16	132	52	143
Environmental Information Processing	Signal Transduction	Notch signaling pathway	Notch signaling pathway	0	0	0	0	0	0	0	0	0	0	0	0	0	0	0	0	0	0	0	0	0	0	0	0	0	0	0	0	0	0	0	0	0	0	0	0	0	0	0	0
Metabolism	Biosynthesis of Other Secondary Metabolites	Novobiocin biosynthesis	Novobiocin biosynthesis	12522	2383	2655	3531	3668	4534	3492	1851	2064	4738	5013	4383	4826	3348	2177	5272	2985	16634	9332	2310	2215	1811	2276	1691	4327	3185	3517	4408	5648	5756	4336	2937	4007	6708	3778	5091	3723	5961	4871	4376
Genetic Information Processing	Replication and Repair	Nucleotide excision repair	Nucleotide excision repair	35596	6204	6498	9646	9969	9350	11335	5353	5855	12470	13321	11760	15474	8472	6198	16545	8320	48335	26465	6562	6367	4935	6349	4634	11733	8587	9694	14483	16461	15341	11856	8438	10494	18403	10958	13049	11220	16580	12447	12238
Organismal Systems	Sensory System	Olfactory transduction	Olfactory transduction	0	0	0	0	0	0	0	0	0	0	0	0	0	0	0	0	0	0	0	0	0	0	0	0	0	0	0	0	0	0	0	0	0	0	0	0	0	0	0	0
Metabolism	Metabolism of Cofactors and Vitamins	One carbon pool by folate	One carbon pool by folate	60563	9995	10341	14534	14637	15173	17143	8282	9584	20744	21967	20545	21867	13211	9529	24722	12703	69927	44920	10349	10595	8152	10140	7616	18927	13212	15698	20788	25681	26527	19953	13103	16118	32143	17908	21564	18903	25675	20244	18554
Cellular Processes	Cell Growth and Death	Oocyte meiosis	Oocyte meiosis	0	0	0	0	0	0	0	0	0	0	0	0	0	0	0	0	0	0	0	0	0	0	0	0	0	0	0	0	0	0	0	0	0	0	0	0	0	0	0	0
Metabolism	Glycan Biosynthesis and Metabolism	Other glycan degradation	Other glycan degradation	20164	3354	2565	4517	4799	2846	4413	3034	3187	5686	8186	6725	9115	3827	2644	6436	4053	20782	13238	3725	3756	2738	3359	2845	4661	4296	4705	7875	9549	7210	4619	4860	4735	9423	4413	5338	3598	6905	5098	6510
Metabolism	Glycan Biosynthesis and Metabolism	Other types of O-glycan biosynthesis	Other types of O-glycan biosynthesis	0	0	0	0	0	0	0	0	0	0	0	0	0	0	0	0	0	0	0	0	0	0	0	0	0	0	0	0	0	0	0	0	0	0	0	0	0	0	0	0
Metabolism	Energy Metabolism	Oxidative phosphorylation	Oxidative phosphorylation	92148	17064	17135	26139	26745	21188	26866	15229	16119	32355	38375	31850	44506	23817	16206	38685	23580	116090	69226	18747	18207	13661	17981	13288	30867	23837	25524	40279	43767	40393	28627	24116	29355	48419	25335	33621	24393	42243	32442	34153
Organismal Systems	Endocrine System	PPAR signaling pathway	PPAR signaling pathway	3488	1298	1219	1681	1851	1569	1108	1054	879	1658	2823	1909	2811	1523	988	1779	1466	6745	3083	1307	1351	1004	1206	988	2079	1535	1248	2295	2083	1945	1356	1395	1906	1956	1114	2149	574	2580	2139	2331
Human Diseases	Cancers	Pancreatic cancer	Pancreatic cancer	0	0	0	0	0	0	0	0	0	0	0	0	0	0	0	0	0	0	0	0	0	0	0	0	0	0	0	0	0	0	0	0	0	0	0	0	0	0	0	0
Organismal Systems	Digestive System	Pancreatic secretion	Pancreatic secretion	0	0	0	0	0	0	0	0	0	0	0	0	0	0	0	0	0	0	0	0	0	0	0	0	0	0	0	0	0	0	0	0	0	0	0	0	0	0	0	0
Metabolism	Metabolism of Cofactors and Vitamins	Pantothenate and CoA biosynthesis	Pantothenate and CoA biosynthesis	47342	9490	9855	14392	14970	12934	19541	7990	8636	19068	22515	17111	25449	13710	10430	28446	13470	76178	38092	10261	9615	7133	9990	7312	20125	13542	13857	21678	24633	22837	18661	13262	17246	26558	16919	21060	16764	26463	19929	17514
Human Diseases	Neurodegenerative Diseases	Parkinson's disease	Parkinson's disease	0	0	0	0	0	0	0	0	0	0	0	6	3	0	0	0	0	0	0	0	0	0	0	0	0	0	0	0	0	0	0	9	0	3	0	0	0	0	0	0
Human Diseases	Infectious Diseases	Pathogenic Escherichia coli infection	Pathogenic Escherichia coli infection	0	5	0	0	0	0	20	0	0	25	0	0	0	0	0	0	0	35	40	0	0	0	0	0	0	0	0	25	0	0	0	0	0	0	0	0	0	0	0	0
Human Diseases	Cancers	Pathways in cancer	Pathways in cancer	4301	721	725	1065	1104	982	536	614	720	1429	1526	1549	953	917	528	883	919	3635	3152	756	736	562	787	525	1156	1025	1191	733	1818	1760	1139	1005	1173	2234	905	1471	815	1719	1464	1382
Metabolism	Biosynthesis of Other Secondary Metabolites	Penicillin and cephalosporin biosynthesis	Penicillin and cephalosporin biosynthesis	1123	299	168	212	315	151	2165	353	170	646	760	422	2152	192	545	2927	303	5768	671	203	202	120	249	181	1013	308	236	2249	1247	600	1111	339	202	414	1256	608	1349	1007	491	334
Metabolism	Carbohydrate Metabolism	Pentose and glucuronate interconversions	Pentose and glucuronate interconversions	36806	8405	9206	14967	15733	11857	19888	7773	7199	14576	19669	12331	30057	11770	9055	28599	11992	82841	27365	7959	6743	5434	7841	5477	15998	11713	11154	28989	21896	16467	14763	10630	13444	18109	15062	15633	14410	25585	16644	20512
Metabolism	Carbohydrate Metabolism	Pentose phosphate pathway	Pentose phosphate pathway	86040	14861	16500	25817	27755	22131	27856	13577	14399	29822	33539	26782	43325	22341	15909	40871	21638	124374	64267	15388	13740	10854	15059	10529	28094	21582	23856	40144	39956	37637	28645	20458	27283	43455	26409	31864	26410	42791	31914	34457
Metabolism	Enzyme Families	Peptidases	Peptidases	175874	32100	33550	46151	47512	53276	53473	27047	28978	61208	62158	57712	73405	43325	29825	76890	41265	227658	130265	31333	30558	24462	31789	22248	54355	43238	49208	70048	80787	73823	54719	40893	51415	92809	50964	59755	53892	80655	60152	59755
Metabolism	Glycan Biosynthesis and Metabolism	Peptidoglycan biosynthesis	Peptidoglycan biosynthesis	76857	13926	13903	19735	20556	20076	32271	12424	12666	28042	28401	25426	38857	18350	15106	45795	18151	117956	56468	14160	13782	10531	14210	10028	27325	18868	20867	37180	38652	33086	28208	18304	22465	39880	27160	27379	29034	37095	26583	24981
Cellular Processes	Transport and Catabolism	Peroxisome	Peroxisome	7745	1938	1548	2103	2487	2054	4293	1534	1406	2892	3988	2917	5162	2115	1806	6104	2086	15531	5809	1912	1979	1530	1736	1426	3441	2200	2026	4497	4325	3019	2706	2161	2620	3756	2995	2639	2922	4130	2568	3116
Human Diseases	Infectious Diseases	Pertussis	Pertussis	92	78	45	5	6	10	89	51	20	122	237	174	4	1	8	24	4	203	114	37	70	71	30	60	144	31	4	89	37	66	15	34	0	60	34	34	1	24	27	66
Cellular Processes	Transport and Catabolism	Phagosome	Phagosome	0	0	0	0	0	0	0	0	0	0	0	0	0	0	0	0	0	0	0	0	0	0	0	0	0	0	0	0	0	0	0	0	0	0	0	0	0	0	0	0
Metabolism	Amino Acid Metabolism	Phenylalanine metabolism	Phenylalanine metabolism	15944	2665	2737	3830	4090	4415	3040	2362	2569	5412	6185	5435	5699	3599	2247	4531	3317	16467	11559	2682	2563	2024	2638	1950	4664	3581	4175	5586	6552	7115	4873	3488	4454	8049	3989	6016	3583	6009	5274	4805
Metabolism	Amino Acid Metabolism	Phenylalanine, tyrosine and tryptophan biosynthesis	Phenylalanine, tyrosine and tryptophan biosynthesis	64488	12525	12322	19114	20126	16927	21882	10809	12004	23845	29333	22172	33267	18059	12893	32648	17236	96508	47027	13775	12646	9500	13105	9786	23972	17935	19000	27465	33214	28779	22873	18116	22307	32235	20256	26397	17981	31725	24494	24125
Metabolism	Biosynthesis of Other Secondary Metabolites	Phenylpropanoid biosynthesis	Phenylpropanoid biosynthesis	14025	2212	1697	3183	3535	2160	3454	2414	2394	4070	5122	3985	8140	3041	2119	4689	3313	13447	10133	2400	1991	1520	2245	1634	3372	3192	3739	8793	6603	5619	3312	3513	3967	7119	3163	3483	3018	5642	3927	4050
Environmental Information Processing	Signal Transduction	Phosphatidylinositol signaling system	Phosphatidylinositol signaling system	9849	1287	1456	1883	1873	1781	3762	1267	1342	3271	2800	2866	3990	1660	1559	5176	1740	12251	7101	1336	1251	956	1364	936	2868	1853	2253	4427	4419	4084	3310	1848	1991	5248	3259	2800	3908	4083	3014	2386
Metabolism	Metabolism of Other Amino Acids	Phosphonate and phosphinate metabolism	Phosphonate and phosphinate metabolism	4236	927	1078	1351	1428	1926	2438	721	814	1583	1412	1131	2676	1303	1041	3288	1098	8265	3308	736	620	582	796	502	1579	1204	1431	2813	2211	1809	1683	1009	1439	2500	1772	1229	2193	2386	1547	1796
Environmental Information Processing	Membrane Transport	Phosphotransferase system (PTS)	Phosphotransferase system (PTS)	145422	16891	23345	29994	28330	42996	48750	19481	18664	46214	29926	37736	67747	27135	21322	61938	24510	154964	101261	13296	11264	11318	15185	8474	32736	23720	36523	88108	55915	63449	48297	22209	29432	75655	45754	38284	57829	48630	36159	42686
Metabolism	Energy Metabolism	Photosynthesis	Photosynthesis	39028	6968	6138	9364	10290	8277	13475	6264	6786	14010	15376	13489	17347	9341	7123	19388	9075	48398	28893	7519	7133	5079	7576	5328	13311	9815	10646	14310	20317	16339	13296	10164	11908	20523	11870	13553	11788	16891	12394	11612
Metabolism	Energy Metabolism	Photosynthesis - antenna proteins	Photosynthesis - antenna proteins	0	0	0	0	0	0	0	0	0	0	0	0	0	0	0	0	0	0	0	0	0	0	0	0	0	0	0	0	0	0	0	0	0	0	0	0	0	0	0	0
Metabolism	Energy Metabolism	Photosynthesis proteins	Photosynthesis proteins	39130	6975	6148	9373	10316	8286	13503	6267	6792	14026	15389	13498	17380	9363	7131	19431	9118	48638	28935	7530	7140	5087	7587	5335	13329	9845	10658	14328	20344	16349	13299	10179	11916	20541	11881	13559	11794	17059	12523	11641
Organismal Systems	Sensory System	Phototransduction	Phototransduction	0	0	0	0	0	0	0	0	0	0	0	0	0	0	0	0	0	0	0	0	0	0	0	0	0	0	0	0	0	0	0	0	0	0	0	0	0	0	0	0
Organismal Systems	Sensory System	Phototransduction - fly	Phototransduction - fly	0	0	0	0	0	0	0	0	0	0	0	0	0	0	0	0	0	0	0	0	0	0	0	0	0	0	0	0	0	0	0	0	0	0	0	0	0	0	0	0
Organismal Systems	Environmental Adaptation	Plant-pathogen interaction	Plant-pathogen interaction	11705	2498	2954	4404	4469	4051	3175	2305	2326	4862	5946	4539	6378	3804	2466	4875	3785	16886	9772	2706	2545	1949	2612	1953	4894	3685	3752	6114	5621	6235	4369	3398	4916	6586	3608	6020	3091	7320	5880	5327
Metabolism	Xenobiotics Biodegradation and Metabolism	Polycyclic aromatic hydrocarbon degradation	Polycyclic aromatic hydrocarbon degradation	13796	1834	1564	2209	2259	2217	5157	1933	1990	4337	3821	3943	6016	2191	2137	7045	2253	15724	9782	1926	1818	1331	1947	1348	3741	2467	3248	6431	6332	5434	4469	2716	2861	7108	4355	3677	5074	4367	3083	2739
Metabolism	Metabolism of Terpenoids and Polyketides	Polyketide sugar unit biosynthesis	Polyketide sugar unit biosynthesis	9884	3060	3159	4306	4498	3407	6581	2653	2513	4952	6431	4755	8634	4233	3289	9231	4307	23010	8097	3208	3224	2344	3275	2280	6060	4304	3917	7425	7400	4968	4906	4069	5127	5578	4617	4717	4217	8343	5747	5672
Metabolism	Metabolism of Cofactors and Vitamins	Porphyrin and chlorophyll metabolism	Porphyrin and chlorophyll metabolism	55633	15704	19352	28395	30394	26458	16938	11127	13132	27529	40257	23330	30008	25540	14740	28601	25065	109064	53629	17355	15005	11386	16848	11881	31656	24595	21508	18263	31690	31166	23135	22191	32208	35319	17924	38288	12810	48893	39184	33702
Metabolism	Metabolism of Terpenoids and Polyketides	Prenyltransferases	Prenyltransferases	25497	4787	4755	6471	6611	6334	8345	4514	4307	9411	10215	9663	12466	5866	4571	11702	5918	31997	19194	4889	5187	3896	4782	3658	9361	6112	6857	13243	11688	12094	9166	5987	7344	13566	8178	10039	8281	11876	9516	8253
Metabolism	Lipid Metabolism	Primary bile acid biosynthesis	Primary bile acid biosynthesis	3906	395	230	526	609	418	621	446	531	895	1055	820	1365	504	446	958	509	3052	2518	495	352	286	419	320	583	613	862	1096	1720	1278	751	789	613	1705	685	903	622	733	560	699
Human Diseases	Immune System Diseases	Primary immunodeficiency	Primary immunodeficiency	4720	790	1054	1461	1374	1466	2478	704	736	1751	1764	1490	2775	1163	1031	3449	1150	8909	3346	800	793	675	735	568	1782	1098	1267	2821	2369	2037	1867	1046	1321	2252	1964	1794	2112	2677	1780	2144
Human Diseases	Neurodegenerative Diseases	Prion diseases	Prion diseases	584	95	100	263	252	149	101	55	160	84	197	86	206	182	76	140	164	1041	354	89	67	78	98	45	79	161	246	84	177	126	94	154	155	152	115	113	64	332	190	425
Organismal Systems	Endocrine System	Progesterone-mediated oocyte maturation	Progesterone-mediated oocyte maturation	4076	677	717	1060	1094	944	520	534	669	1348	1524	1387	942	915	523	866	918	3580	3069	735	709	541	734	504	1120	978	1115	690	1663	1720	1072	958	1171	2232	852	1471	799	1717	1464	1360
Metabolism	Carbohydrate Metabolism	Propanoate metabolism	Propanoate metabolism	49521	7897	8583	11779	12982	13085	16525	6746	7790	17229	17318	15219	20871	11909	8656	23353	10371	63676	36653	8076	7536	5850	8045	5669	16165	11080	12808	19352	22115	22154	17436	10627	14396	25569	15508	18288	16346	20799	16732	14993
Human Diseases	Cancers	Prostate cancer	Prostate cancer	4077	678	717	1060	1094	944	520	534	669	1348	1526	1387	942	915	523	866	918	3581	3074	735	709	541	734	504	1120	978	1115	690	1663	1720	1072	958	1171	2234	852	1471	799	1717	1464	1360
Genetic Information Processing	Folding, Sorting and Degradation	Proteasome	Proteasome	4096	677	717	1060	1094	944	520	534	669	1348	1524	1387	942	915	523	866	918	3580	3069	735	709	541	734	504	1120	978	1115	690	1691	1724	1080	958	1171	2232	858	1471	799	1717	1464	1360
Organismal Systems	Digestive System	Protein digestion and absorption	Protein digestion and absorption	250	169	55	7	5	4	19	96	54	110	257	433	2	2	11	27	6	24	37	183	372	276	120	184	173	44	10	45	109	91	38	61	0	69	77	57	0	24	28	70
Genetic Information Processing	Folding, Sorting and Degradation	Protein export	Protein export	48006	9071	9232	13288	13657	12055	19022	8166	8384	18021	19921	17375	24250	11878	9312	27129	11844	72609	35857	9268	9175	6872	9266	6801	18403	12253	13227	23008	23672	22055	18319	11810	14695	25205	16995	19602	17211	24501	18307	17157
Metabolism	Enzyme Families	Protein kinases	Protein kinases	25556	4250	4366	7098	7785	5849	10120	3871	4265	8728	9705	6932	14538	6381	4781	14240	6477	39591	19571	4639	3916	2996	4492	3078	8289	6444	6863	13265	13257	10235	8032	6569	7730	12932	7868	7956	8250	12757	8605	9231
Genetic Information Processing	Folding, Sorting and Degradation	Protein processing in endoplasmic reticulum	Protein processing in endoplasmic reticulum	4269	841	815	1115	1106	976	654	788	737	1590	2130	1887	1767	922	552	950	991	3711	3179	871	972	722	843	658	1613	1031	1135	2003	1793	2313	1559	1015	1182	2288	1119	2193	839	1896	1869	1468
Organismal Systems	Excretory System	Proximal tubule bicarbonate reclamation	Proximal tubule bicarbonate reclamation	82	117	148	70	122	434	44	49	16	80	149	50	24	149	44	34	62	473	179	39	53	77	53	50	91	89	74	75	16	71	21	17	168	103	10	212	11	96	106	115
Metabolism	Nucleotide Metabolism	Purine metabolism	Purine metabolism	199546	35161	37317	52598	53944	50855	76377	31313	32926	72157	75218	66931	96012	47205	37095	108009	46818	288764	149607	36190	35608	27579	35837	25815	70993	48051	53823	92784	96135	87230	71132	47228	57768	103979	67265	72490	71095	96858	71465	68281
Metabolism	Nucleotide Metabolism	Pyrimidine metabolism	Pyrimidine metabolism	170045	29782	31021	44491	45703	42234	63138	26361	27774	60541	63029	57093	79282	39374	31118	90540	38893	244938	125377	30446	30218	23257	30149	21940	58617	40107	45388	75597	80030	73781	60181	39134	48518	87758	57185	61999	60170	80960	59952	57969
Metabolism	Carbohydrate Metabolism	Pyruvate metabolism	Pyruvate metabolism	97522	16665	18065	25114	27200	26736	37502	14999	15799	34249	35513	28806	50214	24639	18451	52579	23237	140568	73876	16904	15245	12089	16727	11624	33149	23577	26392	49534	46072	42105	33020	22647	29977	51405	31479	32767	34638	46168	34015	31472
Organismal Systems	Immune System	RIG-I-like receptor signaling pathway	RIG-I-like receptor signaling pathway	268	17	23	34	88	3	914	10	25	162	62	30	513	106	239	1279	37	2384	134	26	24	21	23	7	316	23	9	400	296	63	355	9	99	39	506	36	643	291	10	23
Genetic Information Processing	Folding, Sorting and Degradation	RNA degradation	RNA degradation	38662	7022	7557	10860	10813	9515	11839	6083	6743	13918	15559	13740	16563	9546	6781	16975	9491	48458	29564	7193	7143	5498	7286	5211	13453	9669	10824	15832	17594	17647	13240	9341	11699	21202	11807	14459	12283	19185	14774	14019
Genetic Information Processing	Transcription	RNA polymerase	RNA polymerase	16661	2732	2999	4130	4213	3887	6759	2567	2700	6065	5962	5468	7932	3835	3199	9539	3846	24234	12474	2881	2762	2107	2923	2029	5963	3891	4487	7806	7890	7371	6246	3844	4787	8744	5935	6051	6478	8013	5947	5178
Genetic Information Processing	Translation	RNA transport	RNA transport	16482	2600	3052	4411	4542	4169	6103	2287	2600	5936	6026	4969	7723	4185	3188	8801	4027	23681	12481	2800	2418	1927	2811	1863	5475	4008	4556	6924	7961	7169	5823	3942	5073	8606	5413	5702	5759	8068	6067	5586
Cellular Processes	Cell Motility	Regulation of actin cytoskeleton	Regulation of actin cytoskeleton	0	0	0	0	0	0	0	0	0	0	0	0	0	0	0	0	0	0	0	0	0	0	0	0	0	0	0	0	0	0	0	0	0	0	0	0	0	0	0	0
Human Diseases	Cancers	Renal cell carcinoma	Renal cell carcinoma	225	44	8	5	10	38	16	80	51	81	2	162	11	2	5	17	1	55	83	21	27	21	53	21	36	47	76	43	155	40	67	47	2	1	53	0	16	2	0	22
Organismal Systems	Endocrine System	Renin-angiotensin system	Renin-angiotensin system	0	0	0	0	0	0	0	0	0	0	0	0	0	0	0	0	0	0	0	0	0	0	0	0	0	0	0	0	0	0	0	0	0	0	0	0	0	0	0	0
Metabolism	Metabolism of Cofactors and Vitamins	Retinol metabolism	Retinol metabolism	782	310	251	244	344	481	388	395	137	278	300	337	1508	271	214	483	255	2196	637	250	313	280	203	185	374	244	176	2094	390	420	171	153	247	187	228	240	132	470	419	302
Human Diseases	Immune System Diseases	Rheumatoid arthritis	Rheumatoid arthritis	0	0	0	0	0	0	0	0	0	0	0	0	0	0	0	0	0	0	0	0	0	0	0	0	0	0	0	0	0	0	0	0	0	0	0	0	0	0	0	0
Metabolism	Metabolism of Cofactors and Vitamins	Riboflavin metabolism	Riboflavin metabolism	13842	3651	3481	4508	4857	4815	5687	3165	2807	6478	7360	6696	8061	4434	3283	8334	4481	23057	11418	3596	3890	2849	3671	2748	6756	4676	4516	7650	7983	7271	5956	4381	5721	7927	5227	7142	4688	8754	6815	5264
Genetic Information Processing	Translation	Ribosome	Ribosome	221151	37880	39630	56681	57342	51678	79566	34129	36336	79859	82150	75928	97912	50595	40110	113782	50779	300471	165437	39819	39535	29670	39990	28765	76935	52204	59123	93914	103617	98253	79469	51309	63706	117612	73666	81509	78444	104078	78507	71306
Genetic Information Processing	Translation	Ribosome Biogenesis	Ribosome Biogenesis	140973	22931	23934	34591	35445	31541	47900	20802	22687	48886	49205	45058	60602	31404	24642	68480	31219	183737	105258	24050	22937	17410	24278	16922	45125	32237	37483	57800	64773	60236	47382	32081	39360	74448	44159	47522	47728	63067	47362	44123
Genetic Information Processing	Translation	Ribosome biogenesis in eukaryotes	Ribosome biogenesis in eukaryotes	4204	776	824	1112	1126	1354	1480	650	697	1558	1563	1449	1827	1071	779	2113	992	5861	3157	759	753	605	769	549	1454	1040	1178	1767	1973	1870	1491	977	1276	2232	1382	1539	1459	1977	1490	1390
Organismal Systems	Digestive System	Salivary secretion	Salivary secretion	0	0	0	0	0	0	0	0	0	0	0	0	0	0	0	0	0	0	0	0	0	0	0	0	0	0	0	0	0	0	0	0	0	0	0	0	0	0	0	0
Metabolism	Lipid Metabolism	Secondary bile acid biosynthesis	Secondary bile acid biosynthesis	3869	390	218	505	568	406	615	444	524	886	1038	816	1348	496	441	947	488	3011	2480	488	347	281	417	315	577	594	843	1093	1703	1269	748	774	607	1702	675	897	620	689	539	644
Environmental Information Processing	Membrane Transport	Secretion system	Secretion system	75891	16675	19128	25335	25496	30119	36339	14665	14323	33617	36079	29916	45839	23115	17432	50697	22189	137730	60707	15631	15256	12110	16276	11704	35419	22754	23630	47292	40217	40485	35518	20162	27819	41721	32160	38308	31971	48169	36509	31354
Metabolism	Metabolism of Other Amino Acids	Selenocompound metabolism	Selenocompound metabolism	37497	6229	6921	8934	9170	11017	12119	5417	5977	13207	12853	11974	15672	8839	6390	16550	8352	43159	28697	6171	5898	4742	6230	4327	11839	8547	10238	16173	16820	16468	12357	8376	10797	20486	11266	12143	12622	16524	12503	11260
Metabolism	Metabolism of Terpenoids and Polyketides	Sesquiterpenoid biosynthesis	Sesquiterpenoid biosynthesis	0	0	0	0	0	0	0	0	0	0	0	0	0	0	0	0	0	0	0	0	0	0	0	0	0	0	0	0	0	0	0	0	0	0	0	0	0	0	0	0
Human Diseases	Infectious Diseases	Shigellosis	Shigellosis	0	2	0	0	0	0	14	0	0	10	0	0	0	0	0	0	0	14	16	0	0	0	0	0	0	0	0	10	0	0	0	0	0	0	0	0	0	0	0	0
Human Diseases	Cancers	Small cell lung cancer	Small cell lung cancer	0	0	0	0	0	0	0	0	0	0	0	0	0	0	0	0	0	0	0	0	0	0	0	0	0	0	0	0	0	0	0	0	0	1	0	0	0	0	0	0
Metabolism	Lipid Metabolism	Sphingolipid metabolism	Sphingolipid metabolism	13197	2287	2063	3947	3720	1629	4347	2022	2287	4202	6994	4729	7061	2810	2152	6452	3192	18681	9236	2739	2651	1857	2401	2086	4257	3116	3153	5550	6921	5248	4052	3484	3460	6439	3900	4864	3227	6519	4555	5544
Genetic Information Processing	Transcription	Spliceosome	Spliceosome	0	0	0	0	0	0	0	0	0	0	0	0	0	0	0	0	0	0	0	0	0	0	0	0	0	0	0	0	0	0	0	0	0	0	0	0	0	0	0	0
Human Diseases	Infectious Diseases	Staphylococcus aureus infection	Staphylococcus aureus infection	1002	471	586	257	370	2440	3831	280	121	922	138	88	2472	566	960	5051	302	9806	911	60	57	262	116	40	1510	358	457	3115	1272	325	1494	134	350	334	2117	99	2789	1616	512	219
Metabolism	Carbohydrate Metabolism	Starch and sucrose metabolism	Starch and sucrose metabolism	104911	16876	16961	25232	27153	25120	32919	15041	16095	34789	38162	30801	49791	23655	17352	46996	23487	130663	78383	17308	15532	12214	16806	11854	30955	23832	27018	49106	49106	44146	32059	23916	28404	55776	29866	33520	31799	46152	34143	32497
Metabolism	Lipid Metabolism	Steroid biosynthesis	Steroid biosynthesis	0	0	0	0	0	0	1	0	0	0	0	0	3	0	0	0	0	0	0	0	0	0	0	0	0	0	0	5	0	0	0	0	0	2	0	0	0	0	0	0
Metabolism	Lipid Metabolism	Steroid hormone biosynthesis	Steroid hormone biosynthesis	172	106	31	5	3	11	66	135	31	80	267	282	409	4	9	32	38	74	62	98	175	122	65	91	64	27	7	665	69	121	26	41	7	72	58	14	4	28	28	64
Metabolism	Biosynthesis of Other Secondary Metabolites	Stilbenoid, diarylheptanoid and gingerol biosynthesis	Stilbenoid, diarylheptanoid and gingerol biosynthesis	226	57	61	13	4	23	12	85	50	76	9	139	12	42	21	16	50	81	12	24	46	29	72	25	54	77	68	33	153	47	53	40	55	9	49	6	1	84	99	60
Metabolism	Biosynthesis of Other Secondary Metabolites	Streptomycin biosynthesis	Streptomycin biosynthesis	20302	4678	4742	6448	6968	5760	9603	3981	3975	8403	9957	7959	12574	6472	4942	13692	6332	35255	15741	4840	4813	3581	4854	3460	9049	6489	6362	11100	11919	9480	8168	6102	7680	11169	7661	8127	7570	12812	9248	8254
Metabolism	Xenobiotics Biodegradation and Metabolism	Styrene degradation	Styrene degradation	689	247	225	233	405	474	390	197	142	240	347	213	931	391	280	454	310	1422	567	207	160	127	191	128	297	318	233	819	520	290	177	277	396	272	131	180	89	344	199	471
Metabolism	Energy Metabolism	Sulfur metabolism	Sulfur metabolism	23065	3794	4133	5232	5433	6046	7819	3383	3585	8109	8462	7332	10863	5548	4148	10855	5240	27255	17825	3938	3779	3024	3776	2736	7518	5213	6044	10789	10642	9959	7237	5290	6873	12498	6848	6994	7596	10459	7905	6729
Genetic Information Processing	Folding, Sorting and Degradation	Sulfur relay system	Sulfur relay system	22960	4481	5205	6783	7158	8389	7461	3455	3831	8650	9212	7224	10021	6627	4383	10963	6106	33324	18297	4230	3739	3071	4349	2897	8069	6307	6665	8721	11035	9988	7307	5848	7868	12795	6697	8605	7017	12434	9542	8491
Metabolism	Lipid Metabolism	Synthesis and degradation of ketone bodies	Synthesis and degradation of ketone bodies	1084	679	921	840	984	1970	1248	595	334	946	641	738	1697	1062	701	1656	824	4401	1287	422	424	436	514	321	986	813	770	2182	789	754	769	474	1348	750	862	618	990	1501	998	1097
Human Diseases	Immune System Diseases	Systemic lupus erythematosus	Systemic lupus erythematosus	0	0	0	0	0	0	1	0	0	0	0	0	0	0	0	0	0	0	0	0	0	0	0	0	0	0	0	0	0	0	0	0	0	0	0	0	0	0	0	0
Environmental Information Processing	Signal Transduction	TGF-beta signaling pathway	TGF-beta signaling pathway	0	0	0	0	0	0	0	0	0	0	0	0	0	0	0	0	0	0	0	0	0	0	0	0	0	0	0	0	0	0	0	0	0	0	0	0	0	0	0	0
Metabolism	Metabolism of Other Amino Acids	Taurine and hypotaurine metabolism	Taurine and hypotaurine metabolism	8829	1622	1733	2375	2492	2086	3122	1586	1491	3091	3230	3010	4494	2030	1593	4375	2044	11929	6573	1604	1620	1214	1643	1184	3026	2123	2365	4752	4118	3801	2873	2035	2573	4570	2752	2856	2972	4184	3089	3257
Metabolism	Metabolism of Terpenoids and Polyketides	Terpenoid backbone biosynthesis	Terpenoid backbone biosynthesis	51813	9486	10265	14472	14606	13431	17272	8631	8895	19248	19976	18819	23354	12963	9765	24817	12824	68704	39582	9779	9756	7384	9896	7087	18381	13028	14591	22821	23916	23732	18416	12452	16348	27980	16804	19694	17583	25572	19571	18422
Metabolism	Metabolism of Terpenoids and Polyketides	Tetracycline biosynthesis	Tetracycline biosynthesis	18674	2660	3103	4281	4438	4562	7219	2308	2805	6261	6001	4631	8798	4409	3510	10129	4248	25786	14397	2897	2355	1879	2857	1840	5826	4171	4934	8037	8569	7792	6103	4253	5343	10188	5857	5859	6926	8044	5936	5171
Metabolism	Metabolism of Cofactors and Vitamins	Thiamine metabolism	Thiamine metabolism	48156	8518	8892	12629	13265	12914	16208	7223	8132	17746	18907	16212	20255	12471	9220	23972	11920	66301	37020	8878	8221	6246	9038	6259	16525	12298	13633	17525	22902	21347	16825	11889	15404	25895	15384	18050	15808	23664	18003	15244
Cellular Processes	Cell Communication	Tight junction	Tight junction	0	0	0	0	0	0	0	0	0	0	0	0	0	0	0	0	0	0	0	0	0	0	0	0	0	0	0	0	0	0	0	0	0	0	0	0	0	0	0	0
Metabolism	Xenobiotics Biodegradation and Metabolism	Toluene degradation	Toluene degradation	2141	952	624	818	761	319	1629	822	607	1139	2035	1764	2813	552	563	2129	642	5554	1557	827	1183	799	783	756	1726	780	527	2856	1564	1483	1445	846	584	973	1236	1703	806	1380	1226	1448
Human Diseases	Infectious Diseases	Toxoplasmosis	Toxoplasmosis	0	0	0	0	0	0	0	0	0	0	0	0	0	0	0	0	0	0	0	0	0	0	0	0	0	0	0	0	0	0	0	0	0	1	0	0	0	0	0	0
Genetic Information Processing	Transcription	Transcription factors	Transcription factors	168267	31088	34906	52393	55271	55552	66695	27803	28612	61368	63365	49728	96197	48156	34370	93963	46897	270541	130913	30550	25969	21298	31005	20228	56694	45650	49948	94600	82737	74083	58013	41950	56883	90049	55712	61316	60297	90944	63138	66957
Genetic Information Processing	Transcription	Transcription machinery	Transcription machinery	66630	14754	15283	22856	23915	21397	22419	11768	12774	25467	30553	23910	33296	21068	14224	33590	20560	103254	52830	15432	14417	10990	15226	10738	25023	20706	20956	27049	33676	29603	22036	19320	26004	37035	20371	26565	19979	38027	27652	28978
Genetic Information Processing	Translation	Translation factors	Translation factors	52153	8559	9025	13100	13209	11214	16766	7698	8449	18205	18932	17523	21342	11470	8890	24119	11561	65582	38920	9134	9038	6759	9130	6589	17116	11896	13716	20195	23473	22892	17780	11834	14507	27797	16225	18697	17279	23333	17968	16839
Environmental Information Processing	Membrane Transport	Transporters	Transporters	693904	122555	133225	203676	222268	207857	278859	114757	116013	247758	258859	199194	405553	186210	137342	392066	185600	1096710	526870	122680	102161	82583	123400	81208	234344	182090	199168	397913	347276	299514	241249	172688	225364	357124	230762	245084	244524	360170	250312	262289
Metabolism	Biosynthesis of Other Secondary Metabolites	Tropane, piperidine and pyridine alkaloid biosynthesis	Tropane, piperidine and pyridine alkaloid biosynthesis	10876	1948	2032	2574	2706	3876	2134	1422	1688	3857	4100	3797	3200	2605	1546	3292	2224	11629	7806	1830	1835	1516	1784	1388	3309	2471	2865	2909	4368	5020	3529	2284	3018	5698	2880	4512	2710	4320	3903	3219
Metabolism	Amino Acid Metabolism	Tryptophan metabolism	Tryptophan metabolism	9590	1872	1914	2529	2756	3366	3562	1724	1639	3554	3542	3251	5253	2634	1902	4791	2358	13817	7035	1702	1602	1276	1838	1239	3159	2505	2769	5211	4703	4261	3314	2317	3121	4761	2998	3495	3014	4241	3157	3393
Human Diseases	Infectious Diseases	Tuberculosis	Tuberculosis	15237	2407	2359	3359	3471	3109	5397	2227	2394	5102	4872	4801	6409	3092	2582	7653	3032	19221	11076	2439	2403	1802	2483	1746	4659	3216	3854	6334	6933	6317	5052	3208	3856	8008	4867	4650	5467	6389	4656	4240
Environmental Information Processing	Signal Transduction	Two-component system	Two-component system	86813	19643	22134	32079	34623	31640	35863	17842	17349	36008	42311	30402	59515	28634	19576	51070	28496	155506	72163	19244	17523	13811	19204	13808	37136	28225	27920	58771	47434	43139	33047	25697	35689	46970	30450	39446	28790	58650	42432	40392
Human Diseases	Metabolic Diseases	Type I diabetes mellitus	Type I diabetes mellitus	4229	761	763	1106	1171	970	1534	739	703	1522	1659	1454	2213	998	775	2140	1007	5725	3165	776	770	571	780	567	1457	1017	1131	2355	1977	1931	1496	981	1276	2252	1382	1541	1470	1985	1493	1399
Human Diseases	Metabolic Diseases	Type II diabetes mellitus	Type II diabetes mellitus	4441	773	767	1136	1180	1026	1527	691	794	1623	1803	1594	1892	1073	813	2161	1028	5831	3242	816	801	598	832	587	1614	1085	1283	1748	2098	2114	1772	1055	1333	2306	1521	1909	1486	2032	1643	1411
Metabolism	Amino Acid Metabolism	Tyrosine metabolism	Tyrosine metabolism	31706	5728	6373	7830	8545	11066	12574	5025	4954	11518	10844	9953	16207	7933	6020	17253	7248	45930	24052	5347	5074	4305	5309	3731	11046	7510	8705	17646	14734	14043	11303	6861	9466	16660	10832	10893	12043	14794	11142	9901
Metabolism	Metabolism of Cofactors and Vitamins	Ubiquinone and other terpenoid-quinone biosynthesis	Ubiquinone and other terpenoid-quinone biosynthesis	5904	1426	868	1273	1270	1085	1289	1838	1084	2063	2802	3620	5085	851	632	1237	931	4698	3772	1468	2252	1626	1088	1307	2508	993	1128	7334	2250	3377	1975	1104	969	2105	1683	2412	934	1963	2023	2033
Genetic Information Processing	Folding, Sorting and Degradation	Ubiquitin system	Ubiquitin system	55	21	16	2	2	4	15	12	8	31	106	73	2	1	4	12	2	29	83	12	15	16	8	14	25	10	3	18	33	21	12	14	1	24	20	6	0	12	14	30
Environmental Information Processing	Signal Transduction	VEGF signaling pathway	VEGF signaling pathway	0	0	0	0	0	0	0	0	0	0	0	0	0	0	0	0	0	0	0	0	0	0	0	0	0	0	0	0	0	0	0	0	0	0	0	0	0	0	0	0
Metabolism	Amino Acid Metabolism	Valine, leucine and isoleucine biosynthesis	Valine, leucine and isoleucine biosynthesis	68415	11189	11470	17351	18214	15138	26530	10067	11179	24609	27432	20543	35644	16535	13116	38057	16522	99484	52886	12282	10646	7862	11964	8490	24179	16607	18193	32202	33648	30610	24459	17086	20578	37296	22545	25470	23893	31603	23614	20978
Metabolism	Amino Acid Metabolism	Valine, leucine and isoleucine degradation	Valine, leucine and isoleucine degradation	11458	2922	3637	4212	4388	5151	5708	2671	2291	5708	6301	5501	7842	4074	3020	8044	3686	22805	9400	2640	2886	2310	2729	2132	6303	3776	3773	8211	5840	6958	5999	3094	4975	6342	5316	6988	4959	8486	6944	5627
Metabolism	Glycan Biosynthesis and Metabolism	Various types of N-glycan biosynthesis	Various types of N-glycan biosynthesis	0	0	0	0	0	0	0	0	0	0	0	1	0	0	0	0	0	0	0	0	0	0	0	0	0	0	0	0	0	0	0	3	0	0	0	0	0	0	0	0
Organismal Systems	Circulatory System	Vascular smooth muscle contraction	Vascular smooth muscle contraction	0	0	0	0	0	0	0	0	0	0	0	0	0	0	0	0	0	0	0	0	0	0	0	0	0	0	0	0	0	0	0	0	0	0	0	0	0	0	0	0
Organismal Systems	Excretory System	Vasopressin-regulated water reabsorption	Vasopressin-regulated water reabsorption	0	0	0	0	0	0	0	0	0	0	0	0	0	0	0	0	0	0	0	0	0	0	0	0	0	0	0	0	0	0	0	0	0	0	0	0	0	0	0	0
Human Diseases	Infectious Diseases	Vibrio cholerae infection	Vibrio cholerae infection	0	0	0	0	0	0	0	0	0	0	0	0	0	0	0	0	0	0	0	0	0	0	0	0	0	0	0	0	0	0	0	0	0	0	0	0	0	0	0	0
Human Diseases	Infectious Diseases	Vibrio cholerae pathogenic cycle	Vibrio cholerae pathogenic cycle	9796	1282	1567	2316	2201	2215	1848	1167	1336	3030	2975	2953	3370	1808	1179	2694	1786	9597	7088	1304	1327	1096	1235	943	2311	1760	2311	3726	3576	4245	2749	1763	2102	5044	2427	3210	2635	3831	3132	3112
Human Diseases	Cardiovascular Diseases	Viral myocarditis	Viral myocarditis	0	0	0	0	0	0	0	0	0	0	0	0	0	0	0	0	0	0	0	0	0	0	0	0	0	0	0	0	0	0	0	0	0	1	0	0	0	0	0	0
Metabolism	Metabolism of Cofactors and Vitamins	Vitamin B6 metabolism	Vitamin B6 metabolism	13307	2457	2535	3749	3569	2659	5436	2175	2354	5205	6328	5399	6764	3056	2582	7747	3035	19991	9852	2684	2916	2087	2521	2072	5655	3131	3432	6396	6352	6751	5801	3160	3764	6978	5225	6092	5056	6727	5304	4900
Environmental Information Processing	Signal Transduction	Wnt signaling pathway	Wnt signaling pathway	0	0	0	0	0	0	0	0	0	0	0	0	0	0	0	0	0	0	0	0	0	0	0	0	0	0	0	0	0	0	0	0	0	0	0	0	0	0	0	0
Metabolism	Xenobiotics Biodegradation and Metabolism	Xylene degradation	Xylene degradation	7738	1130	1495	1931	2152	3042	2825	875	1119	2610	2258	1714	3197	2043	1390	3804	1847	10473	6185	1155	862	843	1115	660	2341	1806	2200	3306	3359	3020	2310	1692	2431	4230	2305	2130	2912	3506	2447	2230
Metabolism	Metabolism of Terpenoids and Polyketides	Zeatin biosynthesis	Zeatin biosynthesis	4312	802	779	1089	1101	971	1476	689	722	1561	1678	1654	1823	970	765	2125	966	5641	3156	847	930	699	817	629	1532	1016	1130	1738	2006	1903	1504	1006	1216	2262	1413	1565	1459	1990	1503	1408
Metabolism	Lipid Metabolism	alpha-Linolenic acid metabolism	alpha-Linolenic acid metabolism	1	7	1	0	2	9	26	6	5	26	8	11	10	11	3	9	0	58	37	2	3	2	8	2	14	9	6	33	2	9	2	11	22	2	0	0	0	0	0	3
Metabolism	Metabolism of Other Amino Acids	beta-Alanine metabolism	beta-Alanine metabolism	16744	2754	2861	3932	4243	4927	3501	2020	2613	5952	7006	5588	5506	4164	2522	5282	3607	17968	12324	3052	2990	2353	2828	2182	5432	3880	4410	4177	7348	7643	5344	4066	4977	8531	4172	7076	3555	6516	5885	4778
Metabolism	Biosynthesis of Other Secondary Metabolites	beta-Lactam resistance	beta-Lactam resistance	2230	471	344	601	810	642	1590	380	363	873	1327	589	1980	633	584	2342	634	6188	1471	475	383	305	455	323	1126	676	596	1522	1656	786	946	763	708	803	979	921	788	1259	819	815
Genetic Information Processing	Translation	mRNA surveillance pathway	mRNA surveillance pathway	0	0	0	0	0	0	0	0	0	0	0	0	0	0	0	0	0	0	0	0	0	0	0	0	0	0	0	0	0	0	0	0	0	0	0	0	0	0	0	0
Environmental Information Processing	Signal Transduction	mTOR signaling pathway	mTOR signaling pathway	0	0	0	0	0	0	0	0	0	0	0	0	0	0	0	0	0	0	0	0	0	0	0	0	0	0	0	0	0	0	0	0	0	0	0	0	0	0	0	0
Cellular Processes	Cell Growth and Death	p53 signaling pathway	p53 signaling pathway	0	0	0	0	0	0	0	0	0	0	0	0	0	0	0	0	0	0	0	0	0	0	0	0	0	0	0	0	0	0	0	0	0	1	0	0	0	0	0	0
