# Supplementary material for: Molecular assessment of the fecal microbiota in healthy cats and dogs before and during supplementation with fructo-oligosaccharides (FOS) and inulin using high-throughput 454-pyrosequencing
Source: PeerJ. 2017 Apr 18;5:e3184. doi: 10.7717/peerj.3184 (PMC5398277; doi:10.7717/peerj.3184)
Supplement: Supplemental Information 2 [file peerj-05-3184-s002.xlsx]

## Sheet: dogs
Level_1	Level_2	Level_3	Observation Ids	Viyo-D3-3	Viyo-D6-3	Viyo-D7-1	Viyo-D7-3	Viyo-D5-1	Viyo-D12-1	Viyo-D9-3	Viyo-D9-2	Viyo-D9-1	Viyo-D4-2	Viyo-D4-3	Viyo-D10-4	Viyo-D9-4	Viyo-D3-1	Viyo-D4-4	Viyo-D4-1	Viyo-D5-4	Viyo-D10-1	Viyo-D5-3	Viyo-D5-2	Viyo-D7-2	Viyo-D7-4	Viyo-D11-1	Viyo-D11-2	Viyo-D11-4	Viyo-D10-2	Viyo-D10-3	Viyo-D8-2	Viyo-D8-1	Viyo-D12-2	Viyo-D12-4	Viyo-D3-4	Viyo-D12-3	Viyo-D8-3	Viyo-D6-4	Viyo-D6-2	Viyo-D3-2	Viyo-D6-1	Viyo-D8-4
Metabolism	Xenobiotics Biodegradation and Metabolism	1,1,1-Trichloro-2,2-bis(4-chlorophenyl)ethane (DDT) degradation	1,1,1-Trichloro-2,2-bis(4-chlorophenyl)ethane (DDT) degradation	0	0	0	0	0	0	0	27	0	1	2	0	1	0	0	0	0	0	0	0	0	1	0	0	0	0	0	0	0	0	0	0	0	1	0	0	0	0	1
Environmental Information Processing	Membrane Transport	ABC transporters	ABC transporters	134769	165635	76109	91932	184394	310664	240155	207278	130842	126042	124616	281815	192438	92383	142096	115696	98425	405975	112574	178916	70937	133307	200805	181536	312458	283795	283584	74406	295617	320426	184348	364470	169039	111839	152333	145610	53016	94824	34918
Cellular Processes	Cell Communication	Adherens junction	Adherens junction	0	0	0	0	0	0	0	0	0	0	0	0	0	0	0	0	0	0	0	0	0	0	0	0	0	0	0	0	0	0	0	0	0	0	0	0	0	0	0
Organismal Systems	Endocrine System	Adipocytokine signaling pathway	Adipocytokine signaling pathway	391	611	235	672	1141	1758	948	1935	938	1382	1420	1235	1106	298	1245	1136	685	1426	683	1002	212	1255	2353	1988	2593	967	410	467	1728	3289	1148	1045	644	424	520	411	684	200	239
Human Diseases	Infectious Diseases	African trypanosomiasis	African trypanosomiasis	51	15	11	33	13	281	19	28	37	48	29	44	19	53	37	50	7	25	5	13	30	36	422	272	234	23	29	16	16	676	207	45	136	4	26	13	157	3	7
Metabolism	Amino Acid Metabolism	Alanine, aspartate and glutamate metabolism	Alanine, aspartate and glutamate metabolism	38796	44470	23636	27606	53022	90789	62853	58416	34647	38279	36872	76355	52294	27383	42053	35634	28331	111169	31629	49387	21338	35018	58774	54681	86351	77836	86856	19968	83318	99836	50796	91446	49163	28504	39841	40132	16801	26058	9260
Organismal Systems	Excretory System	Aldosterone-regulated sodium reabsorption	Aldosterone-regulated sodium reabsorption	0	0	0	0	0	0	0	0	0	0	0	0	0	0	0	0	0	0	0	0	0	0	0	0	0	0	0	0	0	0	0	0	0	0	0	0	0	0	0
Human Diseases	Neurodegenerative Diseases	Alzheimer's disease	Alzheimer's disease	1729	2017	1231	1355	2320	4133	2812	2591	1515	1740	1633	3962	2318	1266	1911	1628	1301	5369	1411	2223	1157	1690	2947	2520	3809	3954	4581	837	3737	4576	2685	4732	2535	1375	1794	1868	829	1218	439
Metabolism	Amino Acid Metabolism	Amino acid related enzymes	Amino acid related enzymes	55127	62852	37325	42435	73956	132628	88209	80961	49247	54525	51275	116258	74077	39162	60118	50478	39887	164310	44489	68732	33714	53268	87097	79946	123404	118132	129835	28186	120977	146389	73310	128224	74833	40482	57236	56623	24118	36795	13299
Metabolism	Carbohydrate Metabolism	Amino sugar and nucleotide sugar metabolism	Amino sugar and nucleotide sugar metabolism	64387	64901	42751	49490	77261	150934	91085	83520	45805	61810	55152	145658	69040	48893	67478	58610	41765	204516	47134	70764	43593	56722	99544	87103	133682	151151	184386	25408	131376	167208	91138	150842	89504	41977	58388	61679	30870	39499	13255
Genetic Information Processing	Translation	Aminoacyl-tRNA biosynthesis	Aminoacyl-tRNA biosynthesis	44803	50428	33980	36508	59955	109562	69671	65345	37640	46123	42841	99496	57506	32632	50677	43032	32569	140088	36344	55882	31667	44477	74125	66529	101151	101655	112106	21307	97159	121615	62345	104597	65276	32115	45377	46416	21062	30477	10491
Metabolism	Xenobiotics Biodegradation and Metabolism	Aminobenzoate degradation	Aminobenzoate degradation	2051	2844	5556	3504	3170	5975	4099	4742	2230	2686	2657	6993	2939	1866	2908	2476	2082	8346	2053	3211	6250	2625	5241	4533	5894	6359	8057	1095	5708	7230	5711	9733	6260	2207	2384	2635	1683	1749	763
Human Diseases	Infectious Diseases	Amoebiasis	Amoebiasis	94	165	46	75	208	542	300	517	136	253	259	507	149	64	224	155	104	664	182	191	29	182	237	289	850	395	179	70	288	735	289	362	209	98	132	132	50	76	40
Human Diseases	Neurodegenerative Diseases	Amyotrophic lateral sclerosis (ALS)	Amyotrophic lateral sclerosis (ALS)	196	192	71	90	185	517	325	413	171	246	238	312	141	144	321	161	94	498	121	179	32	130	227	202	474	258	795	81	475	686	329	522	296	137	146	203	100	104	38
Organismal Systems	Immune System	Antigen processing and presentation	Antigen processing and presentation	1629	1932	419	981	2288	3677	2647	2406	1440	1636	1569	3607	2214	1127	1817	1557	1220	5226	1350	2141	244	1574	2016	2072	3492	3745	4069	813	3504	3679	1505	3037	1347	1214	1765	1768	557	1151	385
Cellular Processes	Cell Growth and Death	Apoptosis	Apoptosis	7	0	741	287	2	53	1	2	1	3	6	6	0	32	8	3	0	12	0	0	873	1	11	8	6	11	12	0	0	58	112	2	718	0	0	1	46	17	1
Metabolism	Lipid Metabolism	Arachidonic acid metabolism	Arachidonic acid metabolism	606	1434	392	475	649	1702	1247	933	472	322	363	2292	792	491	439	329	453	2955	517	969	360	694	1225	1228	1233	2257	1659	173	1313	1683	914	1858	1359	661	1138	1390	312	1020	185
Metabolism	Amino Acid Metabolism	Arginine and proline metabolism	Arginine and proline metabolism	43569	50514	22151	30574	61756	105107	72969	67644	40081	45754	43824	89540	60201	30118	50240	41898	33464	126399	37294	57616	18063	41806	68050	60977	101717	89288	102551	23130	95325	113589	59372	107642	53240	33950	46220	44683	18100	29189	11010
Human Diseases	Cardiovascular Diseases	Arrhythmogenic right ventricular cardiomyopathy (ARVC)	Arrhythmogenic right ventricular cardiomyopathy (ARVC)	0	0	0	0	0	0	0	0	0	0	0	0	0	0	0	0	0	0	0	0	0	0	0	0	0	0	0	0	0	0	0	0	0	0	0	0	0	0	0
Metabolism	Carbohydrate Metabolism	Ascorbate and aldarate metabolism	Ascorbate and aldarate metabolism	4461	4948	2272	3142	5289	9817	8018	5786	3294	3637	3720	11120	4731	3251	4257	3513	3238	14162	3571	5713	2701	4110	7535	6048	8584	11020	12854	1637	8405	10305	8155	15940	8638	4059	4719	4412	1784	3119	1085
Metabolism	Xenobiotics Biodegradation and Metabolism	Atrazine degradation	Atrazine degradation	178	350	98	166	407	708	656	994	335	509	471	1280	329	133	462	283	257	1286	388	424	43	431	542	563	1647	946	821	166	552	847	366	722	284	313	320	264	85	119	110
Cellular Processes	Cell Motility	Bacterial chemotaxis	Bacterial chemotaxis	12065	19566	3259	6378	20120	25905	30374	23727	15231	10782	11368	24392	22191	7627	11747	9665	10041	35080	11606	20813	2159	13928	19108	12270	27913	23363	23441	7818	33223	20848	14130	36251	9256	15361	19632	16131	3851	11933	4509
Human Diseases	Infectious Diseases	Bacterial invasion of epithelial cells	Bacterial invasion of epithelial cells	0	1	0	1	0	0	3	5	2	4	4	30	1	1	0	0	0	5	1	0	0	0	3	0	2	23	0	0	9	2	3	1	0	1	11	0	1	3	0
Cellular Processes	Cell Motility	Bacterial motility proteins	Bacterial motility proteins	17001	31623	3900	10035	29757	39836	49566	37001	24093	16275	16849	47645	34803	11989	16669	14324	16581	54821	17744	33326	2332	24389	41727	22553	40912	42063	53098	10874	53823	35751	27804	62846	14146	28860	32233	26103	7415	19996	8464
Environmental Information Processing	Membrane Transport	Bacterial secretion system	Bacterial secretion system	17622	20813	11841	13486	25320	40242	29129	28309	15974	18398	18296	37304	24451	12315	20143	17232	13757	52849	15015	24159	11015	18305	28120	26352	39808	38176	35111	8917	38100	41172	21384	42049	22269	13336	19302	19019	7394	12578	4356
Environmental Information Processing	Signaling Molecules and Interaction	Bacterial toxins	Bacterial toxins	5558	6251	3531	4036	6998	13860	8695	7192	4289	5686	5091	10734	6587	4206	6244	5298	4018	15563	4540	6763	3441	4040	8758	7825	12073	10851	17070	2288	12131	16727	8500	12528	8758	4032	5559	5707	2805	4049	1223
Genetic Information Processing	Transcription	Basal transcription factors	Basal transcription factors	3	9	0	0	10	3	46	44	26	0	0	34	9	8	0	0	4	34	2	23	0	3	5	0	0	26	37	5	4	4	2	0	3	17	12	1	12	25	3
Genetic Information Processing	Replication and Repair	Base excision repair	Base excision repair	17203	18921	12390	13422	22538	39958	26642	24144	14249	17139	15767	38332	21379	12614	18883	15827	12239	55307	13925	20807	11472	16268	25184	22376	36892	39318	43241	8078	37181	43459	23131	41488	23763	11813	17165	17637	7517	11196	3829
Metabolism	Xenobiotics Biodegradation and Metabolism	Benzoate degradation	Benzoate degradation	7761	9934	8557	7651	10917	21136	13610	11812	6715	8549	7921	17875	10529	5913	9594	8140	6479	24572	6810	11100	8405	7803	14362	12778	17873	17729	23306	3737	17965	23560	12355	20790	13440	6945	9193	8900	4340	6468	2150
Metabolism	Biosynthesis of Other Secondary Metabolites	Betalain biosynthesis	Betalain biosynthesis	0	0	0	0	0	0	0	1	0	0	0	0	0	0	0	0	0	0	0	0	0	0	0	0	0	0	0	0	0	0	0	0	0	0	0	0	0	0	0
Organismal Systems	Digestive System	Bile secretion	Bile secretion	0	0	0	0	0	0	0	0	0	0	0	0	0	0	0	0	0	0	0	0	0	0	0	0	0	0	0	0	0	0	0	1	0	0	0	0	0	0	0
Metabolism	Metabolism of Terpenoids and Polyketides	Biosynthesis of 12-, 14- and 16-membered macrolides	Biosynthesis of 12-, 14- and 16-membered macrolides	0	0	0	0	0	0	0	0	0	0	0	0	0	0	0	0	0	0	0	0	0	0	0	0	0	0	0	0	0	0	0	0	0	0	0	0	0	0	0
Metabolism	Metabolism of Terpenoids and Polyketides	Biosynthesis of ansamycins	Biosynthesis of ansamycins	5314	6312	1937	3328	7172	11467	9006	7595	4729	4769	4888	12184	6838	3926	5641	4806	3929	17451	4150	6988	1418	5356	7538	6888	10301	12570	11615	2599	11369	11331	5823	13026	5578	4145	5624	6025	2003	3674	1297
Metabolism	Metabolism of Terpenoids and Polyketides	Biosynthesis of siderophore group nonribosomal peptides	Biosynthesis of siderophore group nonribosomal peptides	77	68	135	45	198	192	304	655	193	157	143	448	193	78	116	100	124	232	112	176	34	114	562	530	347	255	545	56	236	228	915	1930	330	208	109	47	109	44	68
Metabolism	Metabolism of Terpenoids and Polyketides	Biosynthesis of type II polyketide backbone	Biosynthesis of type II polyketide backbone	0	0	0	0	0	0	0	0	0	0	0	0	0	0	0	0	0	0	0	0	0	0	0	0	0	0	0	0	0	0	0	0	0	0	0	0	0	0	0
Metabolism	Metabolism of Terpenoids and Polyketides	Biosynthesis of type II polyketide products	Biosynthesis of type II polyketide products	0	0	0	0	0	0	0	0	0	0	0	0	0	0	0	0	0	0	0	0	0	0	0	0	0	0	0	0	0	0	0	0	0	0	0	0	0	0	0
Metabolism	Lipid Metabolism	Biosynthesis of unsaturated fatty acids	Biosynthesis of unsaturated fatty acids	3280	4171	2745	2937	5092	7779	5819	5526	3338	4024	3861	6517	4910	2307	4296	3663	2756	9381	3089	4731	2915	3448	5653	5190	8580	6544	7533	1831	8041	8572	4463	8058	4503	2713	3921	3551	1745	2436	854
Metabolism	Metabolism of Terpenoids and Polyketides	Biosynthesis of vancomycin group antibiotics	Biosynthesis of vancomycin group antibiotics	1609	2007	1169	1219	2427	3890	2875	2934	1509	1658	1739	4058	2337	1119	1823	1486	1280	5619	1459	2326	1159	1831	3276	3136	4682	4054	3119	861	3567	4536	2658	4839	2067	1302	1870	1806	739	1164	421
Metabolism	Metabolism of Cofactors and Vitamins	Biotin metabolism	Biotin metabolism	3691	5010	2102	2817	6046	9499	7476	8284	4573	4509	4361	8464	6537	2415	4733	3645	3254	11241	3859	5545	1520	4157	6258	6323	11014	7745	8226	2547	9935	10610	4544	9075	4227	3480	4640	4071	1252	2591	1146
Metabolism	Xenobiotics Biodegradation and Metabolism	Bisphenol degradation	Bisphenol degradation	2836	3047	2919	2379	3961	5887	4766	5142	2630	2874	2942	6338	3690	2084	3331	2639	2138	9284	2374	3643	2853	2795	3682	4071	6206	6437	6013	1451	6214	6246	3392	7232	2546	1975	2787	2952	1358	1908	641
Human Diseases	Cancers	Bladder cancer	Bladder cancer	0	1	68	62	7	186	2	0	2	10	11	74	0	0	22	7	19	9	7	0	9	51	81	149	33	46	0	1	1	329	37	27	38	0	6	0	1	1	0
Metabolism	Carbohydrate Metabolism	Butanoate metabolism	Butanoate metabolism	19899	27085	18268	17115	28441	51700	38101	35361	19531	20161	19901	48167	29124	14426	22796	18815	16513	65323	17989	29160	17142	20692	34128	29559	45137	47031	52305	10435	47244	55224	28547	52951	30327	19159	25104	23867	9231	16821	5973
Metabolism	Biosynthesis of Other Secondary Metabolites	Butirosin and neomycin biosynthesis	Butirosin and neomycin biosynthesis	2521	2572	1438	1980	3791	5924	3662	3541	2111	2918	2741	4559	3006	1781	3106	2800	1987	6635	2105	3223	1311	2326	3460	3572	5157	4838	6293	1186	5672	6478	3126	5087	3099	1614	2300	2301	1019	1522	528
Metabolism	Carbohydrate Metabolism	C5-Branched dibasic acid metabolism	C5-Branched dibasic acid metabolism	10456	12563	5313	7963	16404	26568	18408	17688	10424	12258	11788	19030	15815	6582	13120	10869	8584	27205	9641	14604	4534	11094	16652	15047	27568	18880	21339	6159	24721	30395	15414	26581	13060	8265	12012	10433	4106	7036	2675
Environmental Information Processing	Signaling Molecules and Interaction	CAM ligands	CAM ligands	0	0	0	0	0	0	0	0	0	0	0	0	0	0	0	0	0	0	0	0	0	0	0	0	0	0	0	0	0	0	0	0	0	0	0	0	0	0	0
Metabolism	Biosynthesis of Other Secondary Metabolites	Caffeine metabolism	Caffeine metabolism	0	0	0	0	0	2	0	0	0	0	0	0	0	0	0	0	0	0	0	0	0	0	0	0	0	0	0	0	0	0	0	0	0	0	0	0	0	0	0
Environmental Information Processing	Signal Transduction	Calcium signaling pathway	Calcium signaling pathway	0	0	0	0	0	0	0	0	0	0	0	0	0	0	0	0	0	0	0	0	0	0	0	0	0	0	0	0	0	0	0	0	0	0	0	0	0	0	0
Metabolism	Xenobiotics Biodegradation and Metabolism	Caprolactam degradation	Caprolactam degradation	184	78	413	261	171	561	344	496	141	208	210	331	90	174	196	136	108	306	134	141	340	209	486	657	488	231	130	56	327	630	261	692	840	108	110	88	172	66	30
Organismal Systems	Digestive System	Carbohydrate digestion and absorption	Carbohydrate digestion and absorption	265	34	850	795	614	1096	193	276	117	781	627	446	85	238	773	720	372	428	343	358	949	354	858	1098	675	426	1236	45	701	1689	967	1081	1129	72	44	16	220	68	32
Metabolism	Energy Metabolism	Carbon fixation in photosynthetic organisms	Carbon fixation in photosynthetic organisms	23347	26169	13862	17591	32170	54281	38259	35536	21201	23556	23013	52054	30962	16780	26135	22300	17553	74089	19179	29964	12457	24335	37478	34649	51213	53348	56072	12033	52599	58157	31929	60252	29252	17474	23302	23857	9792	15084	5652
Metabolism	Energy Metabolism	Carbon fixation pathways in prokaryotes	Carbon fixation pathways in prokaryotes	32042	41519	19590	23030	45107	76825	57422	51530	32525	31944	31265	66701	48602	21938	35195	29291	25023	93094	27871	43945	17559	30916	50376	43792	72730	66170	73481	17714	75335	80137	39702	73801	40221	27757	38850	36075	12964	24059	8848
Organismal Systems	Circulatory System	Cardiac muscle contraction	Cardiac muscle contraction	0	0	0	0	0	0	0	32	0	0	3	0	0	0	0	0	0	0	0	0	0	0	0	0	0	0	0	0	0	0	0	0	0	0	0	0	0	0	0
Metabolism	Metabolism of Terpenoids and Polyketides	Carotenoid biosynthesis	Carotenoid biosynthesis	19	9	7	64	214	19	63	108	43	202	228	135	28	16	199	214	138	124	95	177	20	88	606	354	86	125	75	13	11	7	2062	3999	1	17	9	3	7	15	39
Cellular Processes	Cell Growth and Death	Cell cycle	Cell cycle	0	0	0	0	0	0	0	0	0	0	0	0	0	0	0	0	0	0	0	0	0	0	0	0	0	0	0	0	0	0	0	0	0	0	0	0	0	0	0
Cellular Processes	Cell Growth and Death	Cell cycle - Caulobacter	Cell cycle - Caulobacter	17226	20207	13167	13882	24466	40245	29711	28134	16460	17624	17046	36361	25052	12088	19330	16017	13141	51822	14763	23022	12169	18177	27665	24908	39636	36618	37863	9446	39386	43647	22674	42488	23396	13518	18307	18029	7448	12071	4398
Cellular Processes	Cell Growth and Death	Cell cycle - yeast	Cell cycle - yeast	0	0	0	0	0	0	0	0	0	0	0	0	0	0	0	0	0	0	0	0	0	0	0	0	0	0	0	0	0	0	0	0	0	0	0	0	0	0	0
Environmental Information Processing	Signaling Molecules and Interaction	Cellular antigens	Cellular antigens	761	1171	268	259	605	1707	1041	1096	393	371	434	2361	670	738	469	412	440	2894	370	830	83	366	1512	1037	1388	2286	2034	139	1402	1924	576	1318	816	627	969	1342	471	701	188
Human Diseases	Infectious Diseases	Chagas disease (American trypanosomiasis)	Chagas disease (American trypanosomiasis)	41	1	7	29	2	228	2	0	2	34	18	0	0	48	27	35	1	0	1	0	24	20	372	234	207	3	3	1	1	628	184	33	106	0	6	1	147	1	0
Genetic Information Processing	Folding, Sorting and Degradation	Chaperones and folding catalysts	Chaperones and folding catalysts	30528	35630	22712	24056	43126	71380	51445	50354	28718	31838	30900	66031	43046	21477	34620	28846	23206	93249	26044	40289	21238	30487	47314	43742	71007	66450	70087	16239	68522	76361	40294	75355	40512	23494	32205	31990	12753	21033	7669
Metabolism	Xenobiotics Biodegradation and Metabolism	Chloroalkane and chloroalkene degradation	Chloroalkane and chloroalkene degradation	7234	8534	6912	6201	10245	17575	12248	12770	7380	8124	7774	16948	10112	5261	8905	7277	5672	23433	6393	9592	6646	7458	12052	11144	17690	16713	18062	4005	16246	19987	10999	19161	9396	5674	7648	7479	3710	4835	1929
Metabolism	Xenobiotics Biodegradation and Metabolism	Chlorocyclohexane and chlorobenzene degradation	Chlorocyclohexane and chlorobenzene degradation	346	245	569	598	405	1161	367	572	333	598	414	1278	353	285	584	490	189	1639	285	192	687	518	1093	822	1335	1285	1704	161	943	1872	1515	2148	563	131	217	123	337	45	77
Organismal Systems	Nervous System	Cholinergic synapse	Cholinergic synapse	0	0	0	0	0	0	0	0	0	0	0	0	0	0	0	0	0	0	0	0	0	0	0	0	0	0	0	0	0	0	0	0	0	0	0	0	0	0	0
Genetic Information Processing	Replication and Repair	Chromosome	Chromosome	56737	65668	42271	44925	79004	130944	92750	84574	49773	58072	54751	118439	75995	40370	63669	53726	42233	171494	47598	73471	40109	54674	84606	76410	123980	121420	133564	27941	124629	139583	73489	135090	74198	42207	60355	59515	24704	39481	13532
Human Diseases	Cancers	Chronic myeloid leukemia	Chronic myeloid leukemia	0	0	0	0	0	0	0	0	0	0	0	0	0	0	0	0	0	0	0	0	0	0	0	0	0	0	0	0	0	0	0	0	0	0	0	0	0	0	0
Organismal Systems	Environmental Adaptation	Circadian rhythm - plant	Circadian rhythm - plant	3	0	0	0	0	1	0	1	0	1	1	0	0	2	0	0	2	0	0	1	0	0	0	0	21	0	0	1	0	0	0	1	0	0	0	0	9	0	0
Metabolism	Carbohydrate Metabolism	Citrate cycle (TCA cycle)	Citrate cycle (TCA cycle)	14991	19808	9917	11295	22066	35312	27807	27477	16716	15910	16026	31358	24116	10263	17126	14292	12629	41129	13650	21450	9671	14955	26670	20877	33579	29884	33374	8693	37763	37109	23694	44390	21685	14191	18632	17062	6473	11208	4708
Metabolism	Biosynthesis of Other Secondary Metabolites	Clavulanic acid biosynthesis	Clavulanic acid biosynthesis	0	0	0	0	0	0	0	0	0	0	0	0	0	0	0	0	0	0	0	0	0	0	0	0	0	0	0	0	0	0	0	0	0	0	0	0	0	0	0
Human Diseases	Cancers	Colorectal cancer	Colorectal cancer	0	0	0	0	0	1	0	0	0	0	0	0	0	0	0	0	0	0	0	0	0	0	0	0	0	0	0	0	0	0	0	0	0	0	0	0	2	0	0
Organismal Systems	Immune System	Complement and coagulation cascades	Complement and coagulation cascades	0	0	0	0	0	0	0	0	0	0	0	0	0	0	0	0	0	0	0	0	0	0	0	0	0	0	0	0	0	0	0	0	0	0	0	0	0	0	0
Metabolism	Metabolism of Other Amino Acids	Cyanoamino acid metabolism	Cyanoamino acid metabolism	9666	11420	5429	7169	13900	24626	16284	15289	8515	9806	9118	19909	13109	6582	10584	8791	6940	29339	7926	12468	5110	9441	15225	13747	22948	20549	25406	4918	21564	29013	16984	28926	13392	7621	10381	10048	4057	6769	2421
Metabolism	Amino Acid Metabolism	Cysteine and methionine metabolism	Cysteine and methionine metabolism	35180	40954	22478	27011	47818	85804	57518	53312	29717	36082	33689	75019	45517	25861	39548	33635	26418	104878	29195	45447	20303	32672	57080	50456	76928	75453	91446	16306	76293	96874	46622	80451	48538	27433	36927	37323	16523	25427	8566
Metabolism	Enzyme Families	Cytochrome P450	Cytochrome P450	0	0	0	0	0	0	0	0	0	0	0	0	0	0	0	0	0	0	0	0	0	0	0	0	0	0	0	0	0	0	0	0	0	0	0	0	0	0	0
Environmental Information Processing	Signaling Molecules and Interaction	Cytokine receptors	Cytokine receptors	0	0	0	0	0	0	0	0	0	0	0	0	0	0	0	0	0	0	0	0	0	0	0	0	0	0	0	0	0	0	0	0	0	0	0	0	0	0	0
Environmental Information Processing	Signaling Molecules and Interaction	Cytokine-cytokine receptor interaction	Cytokine-cytokine receptor interaction	0	0	0	0	0	0	0	0	0	0	0	0	0	0	0	0	0	0	0	0	0	0	0	0	0	0	0	0	0	0	0	0	0	0	0	0	0	0	0
Cellular Processes	Cell Motility	Cytoskeleton proteins	Cytoskeleton proteins	14484	17557	8725	10215	21858	31915	24831	22682	13236	15043	14797	29878	20343	9984	16683	14124	11419	45070	12817	20449	7848	14283	19495	18641	32363	31079	30248	7552	31089	31905	14976	31256	14240	11022	16276	15818	5736	10450	3462
Organismal Systems	Immune System	Cytosolic DNA-sensing pathway	Cytosolic DNA-sensing pathway	0	0	0	0	0	0	0	0	0	0	0	0	0	0	0	0	0	0	0	0	0	0	0	0	0	0	0	0	0	0	0	0	0	0	0	0	0	0	0
Metabolism	Metabolism of Other Amino Acids	D-Alanine metabolism	D-Alanine metabolism	3903	4406	4086	3452	4927	9125	6253	5583	3258	3734	3517	9161	4919	3054	4149	3507	2841	12306	3090	4913	4118	3687	6796	6003	8492	9113	10226	1790	8181	9839	5859	10143	7112	3066	3855	4146	2005	2755	985
Metabolism	Metabolism of Other Amino Acids	D-Arginine and D-ornithine metabolism	D-Arginine and D-ornithine metabolism	186	134	45	84	68	156	157	192	47	94	79	629	38	246	136	109	60	937	67	86	20	155	386	200	193	642	354	26	344	101	463	1211	92	35	58	260	151	75	23
Metabolism	Metabolism of Other Amino Acids	D-Glutamine and D-glutamate metabolism	D-Glutamine and D-glutamate metabolism	5149	6095	3947	4033	7011	12390	8449	7730	4511	5268	4964	10865	6975	3774	5786	4903	3871	15461	4370	6727	3471	4836	8392	7532	11452	10971	12485	2486	11336	13663	6843	11778	7306	3957	5502	5503	2443	3779	1263
Genetic Information Processing	Replication and Repair	DNA repair and recombination proteins	DNA repair and recombination proteins	105289	118954	76606	83524	143179	247947	167951	154307	90207	108135	101135	222616	137196	76014	118675	100277	77837	319854	87139	133554	71163	101300	162369	146461	231434	227474	254160	50880	229344	273252	141581	250509	144666	76156	108289	108737	47749	71873	24567
Genetic Information Processing	Replication and Repair	DNA replication	DNA replication	26354	29198	18356	20223	34476	61780	40443	36988	21321	26088	23987	53978	32648	19111	28590	24324	18686	77904	21062	32062	17275	23915	40089	35340	55409	55724	64922	11829	56165	68807	34829	59450	36703	18258	26644	26906	12087	17844	5812
Genetic Information Processing	Replication and Repair	DNA replication proteins	DNA replication proteins	44656	50327	31302	34733	61072	102722	71480	67954	38173	45487	42786	94215	57946	32165	49654	42125	32811	137064	36961	56748	29648	42944	66934	59946	97244	96925	106813	21413	97470	112482	58575	105436	61601	31778	45698	45920	20105	30495	10308
Human Diseases	Cardiovascular Diseases	Dilated cardiomyopathy (DCM)	Dilated cardiomyopathy (DCM)	0	0	0	0	0	0	0	0	0	0	0	0	0	0	0	0	0	0	0	0	0	0	0	0	0	0	0	0	0	0	0	0	0	0	0	0	0	0	0
Metabolism	Xenobiotics Biodegradation and Metabolism	Dioxin degradation	Dioxin degradation	3008	3361	2974	2609	3975	7778	4946	3931	2447	3253	2980	5577	3855	2136	3505	2968	2262	7757	2455	3975	3103	2409	4780	4220	6898	5598	8372	1480	5952	8209	4804	7771	5600	2568	3135	2871	1455	2092	767
Metabolism	Xenobiotics Biodegradation and Metabolism	Drug metabolism - cytochrome P450	Drug metabolism - cytochrome P450	431	430	1020	511	792	1358	815	846	687	672	721	796	729	345	754	613	506	965	455	726	766	446	1540	1063	946	685	664	348	1046	2089	1966	3257	976	430	434	331	435	190	165
Metabolism	Xenobiotics Biodegradation and Metabolism	Drug metabolism - other enzymes	Drug metabolism - other enzymes	10459	12986	8105	8912	15199	25314	18454	17412	9906	10944	10478	23048	14934	7361	11944	10004	8261	33128	9229	14466	7628	11461	16356	15323	23860	23682	25688	5510	24217	27410	13757	24736	15736	8551	11740	11337	4627	7992	2680
Environmental Information Processing	Signaling Molecules and Interaction	ECM-receptor interaction	ECM-receptor interaction	0	0	0	0	0	0	0	0	0	0	0	0	0	0	0	0	0	0	0	0	0	0	0	0	0	0	0	0	0	0	0	0	0	0	0	0	0	0	0
Organismal Systems	Excretory System	Endocrine and other factor-regulated calcium reabsorption	Endocrine and other factor-regulated calcium reabsorption	0	0	0	0	0	0	0	0	0	0	0	0	0	0	0	0	0	0	0	0	0	0	0	0	0	0	0	0	0	0	0	0	0	0	0	0	0	0	0
Cellular Processes	Transport and Catabolism	Endocytosis	Endocytosis	0	0	0	0	0	0	0	0	0	0	0	0	0	0	0	0	0	0	0	0	0	0	0	0	0	0	0	0	0	0	0	0	0	0	0	0	0	0	0
Human Diseases	Infectious Diseases	Epithelial cell signaling in Helicobacter pylori infection	Epithelial cell signaling in Helicobacter pylori infection	3283	4093	1115	2265	4849	7860	5594	5360	2964	3670	3474	7942	4551	2273	4014	3320	2592	11399	3009	4509	842	3522	5067	4625	8395	7998	8303	1684	7601	8485	4288	8155	3630	2493	3684	3701	1251	2398	803
Environmental Information Processing	Signal Transduction	ErbB signaling pathway	ErbB signaling pathway	0	0	0	0	0	0	0	0	0	0	0	0	0	0	0	0	0	0	0	0	0	0	0	0	0	0	0	0	0	0	0	0	0	0	0	0	0	0	0
Metabolism	Lipid Metabolism	Ether lipid metabolism	Ether lipid metabolism	4	224	200	133	93	148	134	212	254	48	65	124	259	3	91	39	34	249	37	83	281	82	36	32	44	135	54	120	339	99	108	79	503	89	143	132	12	83	40
Metabolism	Xenobiotics Biodegradation and Metabolism	Ethylbenzene degradation	Ethylbenzene degradation	653	1507	2660	1424	1291	1783	1647	1351	907	1010	1118	1945	1305	564	1136	1037	913	2219	848	1603	3306	830	2144	1508	1833	1810	2885	356	2093	1971	2022	3333	1775	1066	1384	1213	709	980	328
Organismal Systems	Digestive System	Fat digestion and absorption	Fat digestion and absorption	0	0	0	0	0	0	0	0	0	0	0	0	0	0	0	0	0	0	0	0	0	0	0	0	0	0	0	0	0	0	0	0	0	0	0	0	0	0	0
Metabolism	Lipid Metabolism	Fatty acid biosynthesis	Fatty acid biosynthesis	17291	20716	15519	14988	25182	41768	28955	25526	16031	19492	18237	28555	24542	11560	21036	17889	13532	42322	15267	23444	15779	15250	25812	23820	40021	29154	41574	9114	39569	43597	25321	42915	25813	13611	19505	17420	7225	12547	4302
Metabolism	Lipid Metabolism	Fatty acid elongation in mitochondria	Fatty acid elongation in mitochondria	0	0	0	0	0	0	0	0	0	0	0	0	0	0	0	0	0	0	0	0	0	0	0	0	0	0	0	0	0	0	0	0	0	0	0	0	0	0	0
Metabolism	Lipid Metabolism	Fatty acid metabolism	Fatty acid metabolism	6417	8382	4917	5410	9142	17941	11903	11832	6416	7295	7046	17011	9286	4977	8030	6759	5484	22380	5868	9367	3969	7075	13226	11255	16458	16383	17941	3443	14827	21477	10286	17511	9871	6024	7597	7398	3868	5065	1950
Organismal Systems	Immune System	Fc epsilon RI signaling pathway	Fc epsilon RI signaling pathway	0	0	0	0	0	0	0	0	0	0	0	0	0	0	0	0	0	0	0	0	0	0	0	0	0	0	0	0	0	0	0	0	0	0	0	0	0	0	0
Organismal Systems	Immune System	Fc gamma R-mediated phagocytosis	Fc gamma R-mediated phagocytosis	0	0	0	0	0	0	0	0	0	0	0	0	0	0	0	0	0	0	0	0	0	0	0	0	0	0	0	0	0	0	0	0	0	0	0	0	0	0	0
Cellular Processes	Cell Motility	Flagellar assembly	Flagellar assembly	4698	9492	1271	3236	9113	10806	17810	13572	8425	4827	4818	18096	11569	3808	4468	3547	5451	16863	5565	10798	586	8920	16982	6550	11857	14203	21307	3622	19094	9523	13381	30296	4502	11369	10112	7616	2294	6041	3405
Metabolism	Biosynthesis of Other Secondary Metabolites	Flavone and flavonol biosynthesis	Flavone and flavonol biosynthesis	129	52	233	147	109	440	130	181	40	82	68	48	72	83	70	52	18	49	36	79	303	42	76	82	175	65	33	41	125	498	280	149	955	68	44	43	42	58	19
Metabolism	Biosynthesis of Other Secondary Metabolites	Flavonoid biosynthesis	Flavonoid biosynthesis	162	144	30	95	295	186	152	311	76	264	287	758	68	217	307	318	199	1183	157	283	32	123	154	178	192	784	435	38	259	85	50	435	83	35	56	258	109	95	25
Metabolism	Xenobiotics Biodegradation and Metabolism	Fluorobenzoate degradation	Fluorobenzoate degradation	0	1	0	0	2	10	3	2	4	3	2	0	0	0	0	2	1	0	1	2	0	0	0	0	1	0	0	0	3	0	1	45	0	1	11	0	4	3	0
Cellular Processes	Cell Communication	Focal adhesion	Focal adhesion	0	0	0	0	0	0	0	0	0	0	0	0	0	0	0	0	0	0	0	0	0	0	0	0	0	0	0	0	0	0	0	0	0	0	0	0	0	0	0
Metabolism	Metabolism of Cofactors and Vitamins	Folate biosynthesis	Folate biosynthesis	11723	14351	8575	8848	16394	28294	20649	20393	12038	11424	11128	23673	18035	8267	12408	10151	9101	32634	10395	15498	7254	10894	18557	17438	28200	22856	23984	6937	26884	32494	14359	25221	18033	9550	12747	12529	5184	8371	3114
Metabolism	Carbohydrate Metabolism	Fructose and mannose metabolism	Fructose and mannose metabolism	48612	51129	31898	35991	59028	109132	70908	64058	35691	45204	41922	115130	53588	36357	50701	43682	32430	161015	36300	55713	33937	43438	69031	60827	98229	119896	137645	20083	97294	111515	66885	121753	61961	33707	46037	48285	21190	30228	10260
Environmental Information Processing	Signaling Molecules and Interaction	G protein-coupled receptors	G protein-coupled receptors	0	0	0	0	0	0	0	2	0	0	0	0	0	0	0	0	0	0	0	0	0	0	0	0	0	0	0	0	0	0	0	0	0	0	0	0	0	0	0
Environmental Information Processing	Signaling Molecules and Interaction	GTP-binding proteins	GTP-binding proteins	0	0	0	0	0	0	0	0	0	0	0	0	0	0	0	0	0	0	0	0	0	0	0	0	0	0	0	0	0	0	0	0	0	0	0	0	0	0	0
Metabolism	Carbohydrate Metabolism	Galactose metabolism	Galactose metabolism	33197	32840	19837	23608	40988	76337	48877	45047	24900	31647	29667	65188	37282	24226	34325	29630	21540	94724	24757	37776	20218	27787	50763	43803	70455	68133	79420	14381	65427	83676	51143	88143	48880	21516	29620	29989	14753	19988	6757
Organismal Systems	Digestive System	Gastric acid secretion	Gastric acid secretion	0	0	0	0	0	0	0	0	0	0	0	0	0	0	0	0	0	0	0	0	0	0	0	0	0	0	0	0	0	0	0	0	0	0	0	0	0	0	0
Metabolism	Metabolism of Terpenoids and Polyketides	Geraniol degradation	Geraniol degradation	71	113	358	332	91	678	253	555	213	246	247	726	165	106	152	95	158	248	113	98	316	339	666	581	581	449	533	51	482	1025	301	359	920	190	155	96	174	48	80
Human Diseases	Cancers	Glioma	Glioma	0	0	0	0	0	0	0	0	0	0	0	0	0	0	0	0	0	0	0	0	0	0	0	0	0	0	0	0	0	0	0	0	0	0	0	0	0	0	0
Organismal Systems	Nervous System	Glutamatergic synapse	Glutamatergic synapse	3869	4605	1930	2284	5204	8249	6346	5754	3571	3535	3567	7962	5390	2725	3962	3333	2763	11781	3044	5001	1472	3441	5197	5020	8750	8112	7415	2132	7989	8355	4047	8463	3900	2763	4071	4274	1523	2620	940
Metabolism	Metabolism of Other Amino Acids	Glutathione metabolism	Glutathione metabolism	5245	6317	5905	4996	6587	13531	8685	7842	4401	5097	4742	11558	6611	3988	5551	4571	3744	16077	4331	6507	5365	5258	10482	9414	12042	11515	12016	2401	11204	16407	9543	16461	9738	3950	5560	5687	3145	3950	1267
Environmental Information Processing	Signaling Molecules and Interaction	Glycan bindng proteins	Glycan bindng proteins	0	0	0	0	0	0	0	0	0	0	0	0	0	0	0	0	0	0	0	0	0	0	0	0	0	0	0	0	0	0	0	0	0	0	0	0	0	0	0
Metabolism	Lipid Metabolism	Glycerolipid metabolism	Glycerolipid metabolism	15840	18579	13250	12576	22734	37105	27532	25189	13896	16258	16045	32277	20933	11284	18396	15366	12312	47293	13773	21967	12239	15213	23695	21263	33662	32988	36081	7760	34034	38572	22355	42650	22874	12741	16994	16657	6560	11561	3861
Metabolism	Lipid Metabolism	Glycerophospholipid metabolism	Glycerophospholipid metabolism	19999	23497	13826	15453	28856	46525	34706	32069	18214	20881	19842	41261	27971	14062	22883	19219	15475	59666	17221	27006	12837	19097	29084	26829	45277	41578	49279	10522	44528	49580	26176	49782	25452	16068	21352	20976	8392	14205	5108
Metabolism	Amino Acid Metabolism	Glycine, serine and threonine metabolism	Glycine, serine and threonine metabolism	26673	31458	16783	20971	38084	64272	45214	43444	26289	28324	27095	57226	38940	18711	31251	25744	20389	81989	22891	35128	15661	27577	43404	39037	62881	57750	61888	14931	62604	71773	37197	67325	34626	20743	28793	27631	11843	18044	6823
Metabolism	Carbohydrate Metabolism	Glycolysis / Gluconeogenesis	Glycolysis / Gluconeogenesis	46303	48495	35839	38701	61097	115349	70258	64176	37711	49673	44176	95391	55636	34101	53797	45936	33369	134397	36980	54843	34100	41114	74702	63719	97860	97176	135791	20831	102769	131151	74748	120403	71270	33445	44308	43684	22339	29054	10683
Metabolism	Glycan Biosynthesis and Metabolism	Glycosaminoglycan biosynthesis - chondroitin sulfate	Glycosaminoglycan biosynthesis - chondroitin sulfate	0	0	0	0	0	0	0	0	0	0	0	0	0	0	0	0	0	0	0	0	0	0	0	0	0	0	0	0	0	0	0	0	0	0	0	0	0	0	0
Metabolism	Glycan Biosynthesis and Metabolism	Glycosaminoglycan degradation	Glycosaminoglycan degradation	797	465	491	985	932	3434	810	1785	464	1568	1025	1342	612	682	1319	1095	476	2149	714	430	443	399	1648	1411	2098	1302	6497	146	3269	5640	2722	1769	2883	318	287	361	565	429	110
Metabolism	Glycan Biosynthesis and Metabolism	Glycosphingolipid biosynthesis - ganglio series	Glycosphingolipid biosynthesis - ganglio series	311	128	125	415	404	1255	276	1147	261	748	537	592	297	268	573	488	187	849	286	117	66	247	907	744	928	547	2543	55	1454	2077	1246	1186	785	106	57	113	237	97	50
Metabolism	Glycan Biosynthesis and Metabolism	Glycosphingolipid biosynthesis - globo series	Glycosphingolipid biosynthesis - globo series	1991	2195	1468	1944	3541	5707	3243	4689	1861	3071	2819	3268	2780	1343	2964	2545	1707	5301	2071	2819	1555	2124	4099	3406	5586	3448	5648	966	5484	7733	4790	6975	3706	1380	2073	1784	999	1420	435
Metabolism	Glycan Biosynthesis and Metabolism	Glycosphingolipid biosynthesis - lacto and neolacto series	Glycosphingolipid biosynthesis - lacto and neolacto series	0	0	0	0	0	0	0	6	0	1	1	0	1	0	0	0	0	0	0	0	0	0	0	0	0	0	0	0	1	0	0	0	0	0	0	1	0	0	0
Metabolism	Glycan Biosynthesis and Metabolism	Glycosylphosphatidylinositol(GPI)-anchor biosynthesis	Glycosylphosphatidylinositol(GPI)-anchor biosynthesis	0	0	0	0	0	0	0	0	0	0	0	0	0	0	0	0	0	0	0	0	0	0	0	0	0	0	0	0	0	0	0	0	0	0	0	0	0	0	0
Metabolism	Glycan Biosynthesis and Metabolism	Glycosyltransferases	Glycosyltransferases	7667	9481	10703	8645	11289	19818	13532	14060	7990	8842	8382	20117	11584	5738	9488	7488	6252	26804	7187	10473	10450	9295	13569	12518	19107	19607	18685	4294	18743	22467	12888	22825	16344	6346	8583	8362	3666	5496	2145
Metabolism	Carbohydrate Metabolism	Glyoxylate and dicarboxylate metabolism	Glyoxylate and dicarboxylate metabolism	17496	21163	8921	12704	25318	41872	29965	29184	16195	17775	17668	41336	24379	12235	20040	16665	13651	58477	14986	23800	7318	18560	26169	25638	40601	41829	38692	9291	38634	44118	22446	45140	20788	13587	19279	19292	6682	12346	4349
Organismal Systems	Endocrine System	GnRH signaling pathway	GnRH signaling pathway	0	0	0	0	0	0	0	0	0	0	0	0	0	0	0	0	0	0	0	0	0	0	0	0	0	0	0	0	0	0	0	0	0	0	0	0	0	0	0
Environmental Information Processing	Signal Transduction	Hedgehog signaling pathway	Hedgehog signaling pathway	0	0	0	0	0	0	0	0	0	0	0	0	0	0	0	0	0	0	0	0	0	0	0	0	0	0	0	0	0	0	0	0	0	0	0	0	0	0	0
Organismal Systems	Immune System	Hematopoietic cell lineage	Hematopoietic cell lineage	0	0	0	0	0	0	0	0	0	0	0	0	0	0	0	0	0	0	0	0	0	0	0	0	0	0	0	0	0	0	0	0	0	0	0	0	0	0	0
Human Diseases	Infectious Diseases	Hepatitis C	Hepatitis C	0	0	0	0	0	0	0	0	0	0	0	0	0	0	0	0	0	0	0	0	0	0	0	0	0	0	0	0	0	0	0	0	0	0	0	0	0	0	0
Metabolism	Amino Acid Metabolism	Histidine metabolism	Histidine metabolism	26037	28612	13387	19485	33799	61915	38654	35139	20565	26499	23686	57848	31521	19328	29068	24990	18290	82718	20452	30654	12548	23592	39077	34306	55308	59470	73944	11654	56687	69264	34093	56580	35468	17646	25279	26463	11688	17011	5750
Genetic Information Processing	Replication and Repair	Homologous recombination	Homologous recombination	35485	40651	24418	27584	48019	84361	55951	50604	30125	35916	33582	74194	46303	25391	39441	33519	26061	106353	29104	44961	22642	34030	55145	49830	77231	76329	85456	16880	77213	92760	46241	79626	48931	25574	37197	37051	15955	24722	8210
Human Diseases	Neurodegenerative Diseases	Huntington's disease	Huntington's disease	617	1233	275	285	701	1529	1403	995	515	378	395	1022	865	398	487	324	411	1569	524	973	336	298	776	520	1115	1054	1685	204	1313	1416	1037	1887	1301	754	1143	1080	248	895	174
Human Diseases	Cardiovascular Diseases	Hypertrophic cardiomyopathy (HCM)	Hypertrophic cardiomyopathy (HCM)	0	0	0	0	0	0	0	0	0	0	0	0	0	0	0	0	0	0	0	0	0	0	0	0	0	0	0	0	0	0	0	0	0	0	0	0	0	0	0
Metabolism	Biosynthesis of Other Secondary Metabolites	Indole alkaloid biosynthesis	Indole alkaloid biosynthesis	0	0	0	0	0	0	0	1	0	0	0	0	0	0	0	0	0	0	0	0	0	0	0	0	0	0	0	0	0	0	0	0	0	0	0	0	0	0	0
Human Diseases	Infectious Diseases	Influenza A	Influenza A	0	0	0	0	0	1	0	0	0	0	0	0	0	0	0	0	0	0	0	0	0	0	0	0	0	0	0	0	0	0	0	0	0	0	0	0	2	0	0
Metabolism	Carbohydrate Metabolism	Inositol phosphate metabolism	Inositol phosphate metabolism	2861	3071	2542	2340	3760	7089	4404	5042	2683	3062	2857	5141	3571	2028	3252	2705	1946	7985	2364	3195	2311	2526	4829	4031	6593	5258	5812	1459	6631	7968	4658	7796	4429	1934	2658	2736	1442	1649	665
Organismal Systems	Endocrine System	Insulin signaling pathway	Insulin signaling pathway	2743	2692	1496	2244	4398	6222	4363	4261	2450	3372	3297	5321	3576	1876	3622	3147	2344	7681	2451	3781	1366	2919	4226	4558	6331	5468	5877	1454	5803	6936	4035	7780	2963	1843	2469	2399	1077	1533	623
Environmental Information Processing	Signaling Molecules and Interaction	Ion channels	Ion channels	911	477	1705	1244	644	2521	608	753	222	891	530	1298	333	870	931	853	337	1866	486	400	1884	340	1793	1480	1391	1367	2850	105	1456	3490	1856	1852	2873	250	292	554	809	414	104
Metabolism	Biosynthesis of Other Secondary Metabolites	Isoflavonoid biosynthesis	Isoflavonoid biosynthesis	0	0	0	0	0	0	0	0	0	0	0	0	0	0	0	0	0	0	0	0	0	0	0	0	5	0	0	0	0	0	0	0	0	0	0	0	0	0	0
Metabolism	Biosynthesis of Other Secondary Metabolites	Isoquinoline alkaloid biosynthesis	Isoquinoline alkaloid biosynthesis	1944	2418	604	1151	2371	4636	3490	3020	1820	1529	1485	4679	2687	1461	1726	1419	1425	5887	1534	2409	299	1804	3356	2730	4008	4445	4979	1021	4436	5153	1783	3665	1823	1767	2107	2200	851	1385	546
Human Diseases	Infectious Diseases	Leishmaniasis	Leishmaniasis	0	0	0	0	0	0	0	0	0	0	0	0	0	0	0	0	0	0	0	0	0	0	0	0	0	0	0	0	0	0	0	0	0	0	0	0	0	0	0
Organismal Systems	Immune System	Leukocyte transendothelial migration	Leukocyte transendothelial migration	0	0	0	0	0	0	0	0	0	0	0	0	0	0	0	0	0	0	0	0	0	0	0	0	0	0	0	0	0	0	0	0	0	0	0	0	0	0	0
Metabolism	Metabolism of Terpenoids and Polyketides	Limonene and pinene degradation	Limonene and pinene degradation	2443	2727	3448	2647	3007	6122	4031	3434	2185	2621	2393	5827	2835	2037	2889	2392	1957	7087	2068	2987	3879	2000	4736	3588	4979	5452	8904	1009	5669	7673	4637	7175	4472	2070	2443	2467	1662	1699	655
Metabolism	Lipid Metabolism	Linoleic acid metabolism	Linoleic acid metabolism	2116	2743	2604	1894	3286	3992	3848	4351	2225	2229	2455	5307	3185	1510	2612	2105	1728	8097	1948	3174	2731	2483	2712	3232	5181	5527	3498	1224	4839	3635	2083	5315	1686	1573	2457	2577	989	1671	523
Metabolism	Lipid Metabolism	Lipid biosynthesis proteins	Lipid biosynthesis proteins	16709	20331	14472	14944	25829	40893	29512	28155	16842	20109	19179	29624	25377	11285	21316	18179	13966	42644	15508	23918	14187	17101	27644	25599	40424	29375	38003	9362	39850	44205	24068	41910	23887	13988	18996	17200	7667	12183	4530
Metabolism	Metabolism of Cofactors and Vitamins	Lipoic acid metabolism	Lipoic acid metabolism	518	1235	814	486	749	1420	1151	866	662	496	565	1151	1081	371	578	487	507	1306	530	1023	948	342	1361	719	1152	1113	1436	263	1375	1568	1432	2317	1302	801	1183	961	389	737	220
Metabolism	Glycan Biosynthesis and Metabolism	Lipopolysaccharide biosynthesis	Lipopolysaccharide biosynthesis	249	554	2158	2389	793	4146	576	4002	788	1954	1736	3636	816	438	1654	965	946	1589	1062	508	798	3120	5090	5377	2728	2511	431	128	4227	7262	1311	1344	1339	412	398	544	275	275	260
Metabolism	Glycan Biosynthesis and Metabolism	Lipopolysaccharide biosynthesis proteins	Lipopolysaccharide biosynthesis proteins	2690	3135	4326	4612	3998	10774	4335	7765	3068	4743	4211	8997	3860	2271	4577	3245	2655	8933	3087	3141	2999	5288	9080	9220	8408	7804	8075	1205	10128	16093	6244	8182	7117	2061	2804	2856	1436	1725	771
Organismal Systems	Nervous System	Long-term depression	Long-term depression	0	0	0	0	0	0	0	0	0	0	0	0	0	0	0	0	0	0	0	0	0	0	0	0	0	0	0	0	0	0	0	0	0	0	0	0	0	0	0
Organismal Systems	Nervous System	Long-term potentiation	Long-term potentiation	0	0	0	0	0	0	0	0	0	0	0	0	0	0	0	0	0	0	0	0	0	0	0	0	0	0	0	0	0	0	0	0	0	0	0	0	0	0	0
Metabolism	Amino Acid Metabolism	Lysine biosynthesis	Lysine biosynthesis	32395	36863	19905	24476	46067	77882	54246	49445	30063	34407	32295	64962	45459	22276	37435	31144	24732	92798	27712	42141	17729	31370	48684	43888	75164	65583	79146	17454	72327	87105	43208	75863	41047	24922	33995	32097	13617	21343	7967
Metabolism	Amino Acid Metabolism	Lysine degradation	Lysine degradation	3340	3703	1509	2676	4598	8029	5801	5673	2998	3911	3551	9161	4178	2840	4241	3685	2833	12668	3069	4353	923	3612	5433	4633	7228	8920	11323	1573	8408	9368	4403	8636	4368	2634	3184	3559	1756	2289	861
Cellular Processes	Transport and Catabolism	Lysosome	Lysosome	1541	1307	660	1405	2227	4088	2292	3270	1363	2206	1911	3602	1832	1257	2024	1756	1163	5213	1368	1655	593	1580	2583	2280	3735	3641	6124	701	4130	5996	2866	3643	2882	960	981	1111	897	729	326
Environmental Information Processing	Signal Transduction	MAPK signaling pathway	MAPK signaling pathway	0	0	0	0	0	0	0	0	0	0	0	0	0	0	0	0	0	0	0	0	0	0	0	0	0	0	0	0	0	0	0	0	0	0	0	0	0	0	0
Environmental Information Processing	Signal Transduction	MAPK signaling pathway - yeast	MAPK signaling pathway - yeast	1505	1957	724	1204	2072	4374	2669	2657	1479	1608	1459	3220	2288	974	1769	1372	1120	4546	1299	1955	566	1682	2750	2667	3819	3232	4348	812	3861	5345	3286	5153	2459	1256	1782	1667	649	1259	407
Human Diseases	Infectious Diseases	Measles	Measles	0	0	0	0	0	0	0	0	0	0	0	0	0	0	0	0	0	0	0	0	0	0	0	0	0	0	0	0	0	0	0	0	0	0	0	0	0	0	0
Cellular Processes	Cell Growth and Death	Meiosis - yeast	Meiosis - yeast	18	2	0	0	4	8	0	26	0	9	10	0	1	19	3	4	0	0	0	1	0	1	7	2	7	0	0	0	0	0	0	1	0	1	0	3	32	0	1
Organismal Systems	Endocrine System	Melanogenesis	Melanogenesis	0	0	0	0	0	0	0	0	0	0	0	0	0	0	0	0	0	0	0	0	0	0	0	0	0	0	0	0	0	0	0	0	0	0	0	0	0	0	0
Metabolism	Xenobiotics Biodegradation and Metabolism	Metabolism of xenobiotics by cytochrome P450	Metabolism of xenobiotics by cytochrome P450	428	414	1016	506	773	1300	717	721	666	663	711	789	723	338	749	606	500	862	437	694	763	443	1539	1063	946	671	655	340	990	2072	1959	3195	965	401	431	318	421	147	161
Metabolism	Energy Metabolism	Methane metabolism	Methane metabolism	49353	58935	27856	34655	71001	113062	85688	76221	48867	50387	48937	101040	72339	33283	55932	45985	37571	147470	42608	65737	24953	48113	69941	62872	112397	102250	110646	27849	112146	117651	65145	126255	55072	39178	54688	51104	18692	32703	12556
Organismal Systems	Digestive System	Mineral absorption	Mineral absorption	95	73	17	121	86	253	211	213	181	100	105	791	211	70	74	74	50	850	55	62	34	402	424	277	221	791	453	55	263	258	552	941	91	110	73	67	58	38	38
Genetic Information Processing	Replication and Repair	Mismatch repair	Mismatch repair	30934	36314	21432	23714	42640	71324	51322	46072	27005	31032	29340	64965	41246	22160	34127	28745	23136	94128	26108	40418	19832	29889	46482	41057	66754	66426	72958	15073	67642	77662	39649	73035	41535	23278	33091	32955	13638	22086	7334
Metabolism	Glycan Biosynthesis and Metabolism	N-Glycan biosynthesis	N-Glycan biosynthesis	94	276	140	208	233	702	359	643	420	341	339	717	494	67	308	189	147	704	227	179	42	349	500	633	1040	546	223	189	753	1119	343	374	231	164	237	145	30	40	73
Organismal Systems	Immune System	NOD-like receptor signaling pathway	NOD-like receptor signaling pathway	1630	1938	419	981	2289	3679	2673	2457	1457	1644	1583	3613	2227	1128	1817	1557	1221	5229	1351	2141	244	1578	2023	2077	3522	3749	4069	815	3571	3680	1506	3038	1348	1223	1766	1771	558	1155	389
Metabolism	Xenobiotics Biodegradation and Metabolism	Naphthalene degradation	Naphthalene degradation	4597	5613	6092	4519	6381	12373	7855	7299	4301	5319	5034	9195	6119	3456	5784	4861	3885	11720	4065	6420	6369	3709	9216	7395	10373	8785	14280	2201	10265	14631	9452	14601	8293	4310	5203	4797	2799	3481	1338
Environmental Information Processing	Signaling Molecules and Interaction	Neuroactive ligand-receptor interaction	Neuroactive ligand-receptor interaction	0	0	0	0	0	0	0	0	0	0	0	0	0	0	0	0	0	0	0	0	0	0	0	0	0	0	0	0	0	0	0	0	0	0	0	0	0	0	0
Organismal Systems	Nervous System	Neurotrophin signaling pathway	Neurotrophin signaling pathway	0	0	0	0	0	0	0	0	0	0	0	0	0	0	0	0	0	0	0	0	0	0	0	0	0	0	0	0	0	0	0	0	0	0	0	0	0	0	0
Metabolism	Metabolism of Cofactors and Vitamins	Nicotinate and nicotinamide metabolism	Nicotinate and nicotinamide metabolism	15009	16886	9073	11319	20475	35162	24080	22841	13079	15883	15201	33275	19612	11256	17426	14889	11313	47322	12574	19333	7858	15039	24679	22683	34362	33613	35695	7414	33130	40342	18657	33175	18920	10906	14903	15707	7381	10020	3568
Metabolism	Energy Metabolism	Nitrogen metabolism	Nitrogen metabolism	22690	25613	13681	16510	30695	54152	38312	37684	21078	23160	22114	47208	30395	16180	25094	20915	16366	65492	18200	28477	11308	21969	35583	32828	51752	46396	53974	11678	49493	59994	31095	57232	29004	17512	22908	23287	9961	15040	5864
Metabolism	Xenobiotics Biodegradation and Metabolism	Nitrotoluene degradation	Nitrotoluene degradation	4017	5425	965	1814	5331	8512	8128	7099	5011	3326	3334	8642	6887	2605	3814	2747	2845	11856	3473	5170	549	3511	4820	3820	9135	7893	8168	2746	9938	7717	3390	8525	3158	3969	4976	4646	1054	2590	1277
Genetic Information Processing	Replication and Repair	Non-homologous end-joining	Non-homologous end-joining	27	35	18	117	370	77	105	122	107	422	456	67	130	34	414	423	263	54	198	320	31	148	70	197	144	63	34	49	134	64	35	43	23	65	40	40	37	28	15
Environmental Information Processing	Signal Transduction	Notch signaling pathway	Notch signaling pathway	0	0	0	0	0	0	0	0	0	0	0	0	0	0	0	0	0	0	0	0	0	0	0	0	0	0	0	0	0	0	0	0	0	0	0	0	0	0	0
Metabolism	Biosynthesis of Other Secondary Metabolites	Novobiocin biosynthesis	Novobiocin biosynthesis	5315	6443	2288	3624	6921	12608	8824	7668	4806	4898	4641	12228	7187	3871	5481	4631	3926	16322	4262	6721	1993	5074	8717	7520	11447	12103	13603	2719	11738	14008	6223	11312	6328	4277	5744	5817	2328	3718	1373
Genetic Information Processing	Replication and Repair	Nucleotide excision repair	Nucleotide excision repair	14788	16636	10023	11043	19915	34403	24140	21659	12884	14706	13859	30008	19438	10608	16073	13570	10784	42943	12116	18796	9120	13860	23704	21124	32701	30420	34013	7301	31579	38262	19320	34400	19367	11067	15098	15057	7001	9960	3495
Organismal Systems	Sensory System	Olfactory transduction	Olfactory transduction	0	0	0	0	0	0	0	0	0	0	0	0	0	0	0	0	0	0	0	0	0	0	0	0	0	0	0	0	0	0	0	0	0	0	0	0	0	0	0
Metabolism	Metabolism of Cofactors and Vitamins	One carbon pool by folate	One carbon pool by folate	21722	25055	14560	17571	29422	53837	34766	31962	18588	22878	21007	46476	28669	15677	24890	21038	16021	65008	17831	27392	13202	21499	36219	32039	48854	47090	58383	10323	49688	60587	28916	47973	30088	16498	22686	22619	9981	15212	5228
Cellular Processes	Cell Growth and Death	Oocyte meiosis	Oocyte meiosis	0	0	0	0	0	0	0	0	0	0	0	0	0	0	0	0	0	0	0	0	0	0	0	0	0	0	0	0	0	0	0	0	0	0	0	0	0	0	0
Metabolism	Glycan Biosynthesis and Metabolism	Other glycan degradation	Other glycan degradation	6364	6687	2499	4261	9879	13538	10864	11815	5877	7370	7256	11993	8559	4497	7475	6235	4922	19187	5782	8392	1972	6083	9344	8423	15898	12337	14155	3398	14512	16229	9741	19211	6443	4406	5870	5850	2726	3624	1419
Metabolism	Glycan Biosynthesis and Metabolism	Other types of O-glycan biosynthesis	Other types of O-glycan biosynthesis	0	0	0	0	0	0	0	0	0	0	0	0	0	0	0	0	0	0	0	0	0	0	0	0	0	0	0	0	0	0	0	0	0	0	0	0	0	0	0
Metabolism	Energy Metabolism	Oxidative phosphorylation	Oxidative phosphorylation	36499	44078	19735	25613	51840	82971	64381	62903	35793	37149	35918	80186	53914	24996	40897	33182	27074	117286	31355	48216	17046	37171	53271	47107	86708	81287	84212	20266	85432	85871	48916	97742	41105	28945	40615	38755	14324	25328	9311
Organismal Systems	Endocrine System	PPAR signaling pathway	PPAR signaling pathway	2245	2904	1272	1617	3600	5216	4343	4615	2823	2707	2929	5013	3851	1565	2818	2445	2031	6877	2140	3495	1068	2901	4627	3917	6062	4859	3280	1541	5527	6039	3206	6323	2313	1994	2629	2475	1261	1447	727
Human Diseases	Cancers	Pancreatic cancer	Pancreatic cancer	0	0	0	0	0	0	0	0	0	0	0	0	0	0	0	0	0	0	0	0	0	0	0	0	0	0	0	0	0	0	0	0	0	0	0	0	0	0	0
Organismal Systems	Digestive System	Pancreatic secretion	Pancreatic secretion	0	0	0	0	0	0	0	0	0	0	0	0	0	0	0	0	0	0	0	0	0	0	0	0	0	0	0	0	0	0	0	0	0	0	0	0	0	0	0
Metabolism	Metabolism of Cofactors and Vitamins	Pantothenate and CoA biosynthesis	Pantothenate and CoA biosynthesis	21031	26025	13284	15972	30809	51748	37258	34685	20624	21525	21070	42295	31757	13975	23622	19476	16245	60077	18315	28950	11725	21879	33753	31052	51547	42497	43137	11959	47848	56435	27768	50498	27452	17198	24324	22380	8552	15335	5512
Human Diseases	Neurodegenerative Diseases	Parkinson's disease	Parkinson's disease	0	0	0	0	0	1	0	32	0	0	3	0	0	0	0	0	0	0	0	0	0	0	0	0	0	0	0	0	0	0	0	0	0	0	0	0	2	0	0
Human Diseases	Infectious Diseases	Pathogenic Escherichia coli infection	Pathogenic Escherichia coli infection	0	0	0	0	0	0	0	0	0	0	0	0	0	0	0	0	0	0	0	0	0	0	0	0	0	0	0	0	0	0	0	0	0	0	15	0	0	5	0
Human Diseases	Cancers	Pathways in cancer	Pathways in cancer	1812	2052	687	1116	2363	4085	2752	2600	1476	1752	1666	4408	2247	1381	2003	1691	1303	6193	1416	2229	290	1711	2339	2622	3809	4484	4448	832	3737	4148	1618	3464	1622	1227	1814	2017	730	1221	403
Metabolism	Biosynthesis of Other Secondary Metabolites	Penicillin and cephalosporin biosynthesis	Penicillin and cephalosporin biosynthesis	580	373	929	558	646	1232	777	870	390	409	473	1014	445	376	405	299	317	1140	386	510	1217	455	1084	1021	1557	965	456	218	848	1166	1622	2655	1947	255	364	372	219	225	101
Metabolism	Carbohydrate Metabolism	Pentose and glucuronate interconversions	Pentose and glucuronate interconversions	19395	21728	8983	11559	26901	40396	33139	30214	17732	17725	19143	39250	25091	13208	20141	16525	14298	56061	15761	25880	8611	18088	27383	25663	41755	40295	33765	10052	37112	40407	28096	58751	23778	14834	19927	19472	6808	12159	4540
Metabolism	Carbohydrate Metabolism	Pentose phosphate pathway	Pentose phosphate pathway	35942	40920	22093	26335	49697	82152	59388	52505	31950	35575	34844	77685	47099	25531	39858	33794	26774	113544	29546	46635	20123	36158	52934	48516	76736	80769	83981	18173	78085	85794	48440	93452	44610	26937	37199	37124	14697	23842	8405
Metabolism	Enzyme Families	Peptidases	Peptidases	70327	83584	44700	51456	94667	165359	116149	106215	60719	69852	66144	159524	92603	52436	77603	65439	52657	222923	58636	91388	40849	64771	109232	96885	154879	160445	184370	33437	152424	183071	91849	164718	92241	55239	74757	76785	32471	51017	17274
Metabolism	Glycan Biosynthesis and Metabolism	Peptidoglycan biosynthesis	Peptidoglycan biosynthesis	31280	35930	23036	24904	42733	73630	50167	45021	27901	31659	29996	69703	41904	22405	34744	29382	23367	98254	25901	39984	22329	30755	49243	44394	70492	70886	76045	15717	68355	80209	43626	76487	46817	23140	32669	32702	13888	21120	7578
Cellular Processes	Transport and Catabolism	Peroxisome	Peroxisome	2834	3822	2126	2608	4667	7321	5937	6909	3764	3816	3888	6329	5193	2029	4056	3256	2548	9100	2895	4460	2089	3708	6003	5458	8652	5949	5430	2049	7531	9499	5124	8806	4916	2696	3388	3121	1901	2122	952
Human Diseases	Infectious Diseases	Pertussis	Pertussis	2	34	6	14	10	7	22	233	73	62	79	139	62	7	12	14	3	27	15	2	0	24	36	21	72	116	1	3	157	12	29	445	4	13	69	15	10	12	8
Cellular Processes	Transport and Catabolism	Phagosome	Phagosome	0	0	0	0	0	0	0	0	0	0	0	0	0	0	0	0	0	0	0	0	0	0	0	0	0	0	0	0	0	0	0	0	0	0	0	0	0	0	0
Metabolism	Amino Acid Metabolism	Phenylalanine metabolism	Phenylalanine metabolism	6167	7058	2457	4125	8004	13956	10031	9401	5531	6222	5869	13239	8117	4655	6818	5786	4502	18624	4884	7565	1857	5659	9587	8184	12638	13116	15510	3126	14040	14851	7645	15431	6570	4625	6086	6638	2748	4110	1555
Metabolism	Amino Acid Metabolism	Phenylalanine, tyrosine and tryptophan biosynthesis	Phenylalanine, tyrosine and tryptophan biosynthesis	28431	32610	11186	19710	42419	66298	49704	46561	28348	30332	29889	59248	42042	19286	32941	27772	22813	83999	24840	38628	8732	29981	44894	42141	68527	58656	60017	16644	65693	74488	36955	71511	32597	22016	29566	29019	11152	18075	7319
Metabolism	Biosynthesis of Other Secondary Metabolites	Phenylpropanoid biosynthesis	Phenylpropanoid biosynthesis	4715	4719	1886	3430	7201	12694	7885	8189	4076	5093	4651	8968	6347	3115	5290	4399	3243	14069	3816	5849	1714	4909	7943	7158	12063	9402	12093	2560	10585	16552	10675	17790	6092	3418	4277	4088	1982	2790	1155
Environmental Information Processing	Signal Transduction	Phosphatidylinositol signaling system	Phosphatidylinositol signaling system	3422	3630	3027	2875	4332	8227	4608	4743	2537	3480	3054	7096	3891	2510	3724	3207	2257	9966	2608	3829	3159	2736	5377	4663	7176	7382	9176	1356	6942	9273	5223	7839	5618	2150	3339	3342	1723	2208	714
Metabolism	Metabolism of Other Amino Acids	Phosphonate and phosphinate metabolism	Phosphonate and phosphinate metabolism	1747	2137	1428	1494	2572	4780	2869	2863	1604	2252	2125	3766	2226	1261	2346	2054	1528	4812	1614	2465	1477	1406	2989	2949	4177	3763	6142	807	3960	5683	3211	4279	3624	1499	1880	1768	808	1330	448
Environmental Information Processing	Membrane Transport	Phosphotransferase system (PTS)	Phosphotransferase system (PTS)	48565	42419	27998	35610	42720	115301	59744	44368	21288	37704	29332	125945	35201	40434	42936	38797	25266	166780	27785	42819	32445	34853	75476	57009	81666	132007	185441	11459	85265	125326	88193	140174	84475	30712	37826	43981	24585	29697	8729
Metabolism	Energy Metabolism	Photosynthesis	Photosynthesis	15562	18138	10575	11654	19935	36232	25539	24245	13846	14277	13409	36890	21094	11582	16169	13185	10306	54675	12128	18514	9465	15052	23917	21659	37671	37668	36376	8273	35213	38989	19134	37440	20317	11142	15876	16877	7027	10244	3691
Metabolism	Energy Metabolism	Photosynthesis - antenna proteins	Photosynthesis - antenna proteins	0	0	0	0	0	0	0	0	0	0	0	0	0	0	0	0	0	0	0	0	0	0	0	0	0	0	0	0	0	0	0	0	0	0	0	0	0	0	0
Metabolism	Energy Metabolism	Photosynthesis proteins	Photosynthesis proteins	15570	18153	10582	11656	19941	36233	25541	24287	13853	14288	13422	36900	21102	11587	16179	13189	10308	54690	12132	18518	9467	15057	23921	21661	37703	37675	36380	8273	35227	38997	19139	37473	20318	11145	15899	16893	7036	10256	3692
Organismal Systems	Sensory System	Phototransduction	Phototransduction	0	0	0	0	0	0	0	0	0	0	0	0	0	0	0	0	0	0	0	0	0	0	0	0	0	0	0	0	0	0	0	0	0	0	0	0	0	0	0
Organismal Systems	Sensory System	Phototransduction - fly	Phototransduction - fly	0	0	0	0	0	0	0	0	0	0	0	0	0	0	0	0	0	0	0	0	0	0	0	0	0	0	0	0	0	0	0	0	0	0	0	0	0	0	0
Organismal Systems	Environmental Adaptation	Plant-pathogen interaction	Plant-pathogen interaction	5901	7566	3028	3954	8603	12982	10940	9218	5885	5435	5464	12599	9079	3999	6154	5168	4558	18261	4998	8396	2384	6318	8802	7607	12516	12959	12316	3354	13545	12307	7135	15644	5794	5173	7063	6702	2105	4507	1635
Metabolism	Xenobiotics Biodegradation and Metabolism	Polycyclic aromatic hydrocarbon degradation	Polycyclic aromatic hydrocarbon degradation	4521	4593	4625	4349	5615	10792	6276	5951	3419	4695	4046	10771	5282	3497	5138	4410	3004	15725	3445	4969	4807	4310	7184	6454	9983	11272	13585	2020	9797	12385	7451	11914	7698	2742	3971	4316	2381	2789	965
Metabolism	Metabolism of Terpenoids and Polyketides	Polyketide sugar unit biosynthesis	Polyketide sugar unit biosynthesis	5781	7273	3026	3857	8961	13639	10546	10681	5674	6052	6461	14090	8528	3904	6770	5501	4702	19862	5136	8461	2757	6213	9587	9639	16467	13993	11268	3295	13064	14461	8168	16452	7362	4693	6941	6664	2206	4002	1551
Metabolism	Metabolism of Cofactors and Vitamins	Porphyrin and chlorophyll metabolism	Porphyrin and chlorophyll metabolism	36314	52222	14790	19326	54363	80561	73623	61264	39672	31073	33245	65846	61907	21979	35458	27451	28688	97970	33420	55280	6548	36953	47227	43241	84995	66063	51706	23404	80823	71662	29426	76595	26405	34636	48484	43795	9155	30110	10508
Metabolism	Metabolism of Terpenoids and Polyketides	Prenyltransferases	Prenyltransferases	10361	11712	9062	8807	13627	25560	16344	15458	8991	10453	9757	22736	13750	7531	11380	9652	7433	31651	8259	12830	8458	10436	18100	15707	23358	23088	25092	4983	23185	28578	15972	27150	14904	7614	10675	10762	5023	7147	2502
Metabolism	Lipid Metabolism	Primary bile acid biosynthesis	Primary bile acid biosynthesis	1332	1216	879	970	1805	2596	1890	1719	1215	1385	1291	2128	1769	1033	1452	1316	928	3407	1044	1474	830	988	1758	1590	2753	2274	2826	737	2720	3283	1847	3254	1538	733	932	1051	728	640	259
Human Diseases	Immune System Diseases	Primary immunodeficiency	Primary immunodeficiency	1771	2070	1814	1527	2202	4027	3101	2882	1441	1485	1407	4240	2245	1342	1707	1390	1195	6139	1450	2249	2004	1704	2690	1896	3506	4382	4856	791	3733	4610	2798	4961	3242	1488	1928	1853	874	1341	428
Human Diseases	Neurodegenerative Diseases	Prion diseases	Prion diseases	163	154	45	70	147	412	295	269	100	182	165	211	88	125	223	117	76	395	99	139	20	87	123	111	280	182	733	55	409	594	267	468	265	110	96	177	60	99	21
Organismal Systems	Endocrine System	Progesterone-mediated oocyte maturation	Progesterone-mediated oocyte maturation	1629	1932	419	981	2288	3677	2647	2406	1440	1636	1569	3607	2214	1127	1817	1557	1220	5226	1350	2141	244	1574	2016	2072	3492	3745	4069	813	3504	3679	1505	3037	1347	1214	1765	1768	557	1151	385
Metabolism	Carbohydrate Metabolism	Propanoate metabolism	Propanoate metabolism	17942	20434	14972	15262	24725	45190	29595	29348	16234	19655	18252	39417	23615	13275	21361	18225	13708	56059	15493	23093	13887	17427	29606	26049	40570	39461	49043	8887	41817	49238	24904	42206	26773	13895	18427	18249	8462	12368	4510
Human Diseases	Cancers	Prostate cancer	Prostate cancer	1629	1934	420	983	2289	3677	2647	2417	1442	1639	1574	3607	2219	1127	1818	1559	1220	5228	1350	2141	244	1576	2016	2072	3493	3746	4069	813	3504	3679	1508	3037	1347	1215	1766	1770	557	1151	385
Genetic Information Processing	Folding, Sorting and Degradation	Proteasome	Proteasome	1711	1932	433	1039	2290	4139	2647	2406	1440	1706	1609	3607	2214	1223	1871	1625	1220	5226	1352	2141	292	1614	2760	2540	3906	3751	4075	813	3504	4935	1871	3051	1559	1214	1765	1770	851	1151	385
Organismal Systems	Digestive System	Protein digestion and absorption	Protein digestion and absorption	43	34	17	71	19	242	5	288	70	112	123	62	84	52	43	51	16	23	32	6	24	95	578	409	390	47	5	5	296	703	215	12	123	9	9	20	149	2	10
Genetic Information Processing	Folding, Sorting and Degradation	Protein export	Protein export	20168	23444	14793	16149	28218	47430	33178	32387	18082	20971	20324	44296	27653	14524	23095	19607	15398	63106	17245	26787	14078	20697	32600	30289	45905	45106	46387	10069	44471	50841	27442	49671	28067	15264	21210	21365	8980	14334	4916
Metabolism	Enzyme Families	Protein kinases	Protein kinases	10111	11656	6074	7225	14652	23032	17450	15980	9837	10645	10370	19479	14017	6852	11643	9519	7581	28665	8649	13293	5753	9692	15005	13104	24447	19638	20884	5666	22477	24333	14787	28258	12794	7807	11030	10072	4158	6347	2541
Genetic Information Processing	Folding, Sorting and Degradation	Protein processing in endoplasmic reticulum	Protein processing in endoplasmic reticulum	1676	2010	1148	1435	2563	4185	2777	2804	1638	2023	1978	4014	2422	1196	2129	1835	1433	5428	1523	2343	867	2044	2842	2812	3808	4030	4163	864	3938	4504	2483	4677	1551	1281	1824	1822	619	1173	440
Organismal Systems	Excretory System	Proximal tubule bicarbonate reclamation	Proximal tubule bicarbonate reclamation	46	303	268	123	345	197	464	513	221	313	352	509	350	99	287	258	302	572	331	480	48	194	234	202	168	392	587	67	286	288	84	180	167	295	216	185	101	271	82
Metabolism	Nucleotide Metabolism	Purine metabolism	Purine metabolism	80437	92101	66006	65501	108166	192855	130225	120105	70215	81423	77140	171744	105838	58055	89926	75175	59020	242489	66247	102230	62131	77310	130487	119217	182931	174001	190677	39284	174754	213966	113002	197039	116478	59999	83931	83506	37390	55308	19276
Metabolism	Nucleotide Metabolism	Pyrimidine metabolism	Pyrimidine metabolism	67626	77408	49893	53157	91470	157530	109492	99963	58585	67852	64345	143105	88636	48996	74822	63286	49897	204862	55643	86447	47063	64867	105535	95577	148364	146123	161479	32790	146994	172104	91583	162332	96177	50089	70042	70720	30627	47026	16033
Metabolism	Carbohydrate Metabolism	Pyruvate metabolism	Pyruvate metabolism	37856	43633	29395	30559	53500	92046	63234	60326	34444	40574	38668	77667	51492	26583	44363	37457	29139	110854	32360	50151	28105	35325	58730	53520	85855	78204	94088	19438	84654	97217	56483	100420	54997	29750	39873	38637	16083	26213	9590
Organismal Systems	Immune System	RIG-I-like receptor signaling pathway	RIG-I-like receptor signaling pathway	16	33	655	310	43	167	57	122	39	46	61	48	35	24	100	45	12	155	30	44	873	40	46	29	34	46	28	24	92	120	142	91	712	35	26	26	41	33	11
Genetic Information Processing	Folding, Sorting and Degradation	RNA degradation	RNA degradation	15760	18324	10515	11914	21085	38022	25298	23784	13599	15868	15003	32963	20641	11096	17389	14632	11198	46751	12624	19763	9793	15034	25496	23178	35932	33767	38384	7442	34601	41551	21170	36297	20413	11750	16831	16565	7049	11058	3722
Genetic Information Processing	Transcription	RNA polymerase	RNA polymerase	6722	7679	5680	5494	8899	16152	10559	9444	5687	6772	6322	13267	8784	4867	7514	6368	4876	19209	5418	8448	5433	6038	10644	9625	14841	13513	15499	3215	14505	17664	9430	16129	10326	4814	6999	7063	3163	4694	1572
Genetic Information Processing	Translation	RNA transport	RNA transport	6073	7373	4630	4772	8861	13607	10451	9080	5678	6221	5826	12959	8624	4175	6896	5704	4604	19237	5133	8011	4456	5813	7279	6147	13217	13299	15603	3295	14063	13274	7584	15261	8449	4831	6944	6644	2160	4160	1527
Cellular Processes	Cell Motility	Regulation of actin cytoskeleton	Regulation of actin cytoskeleton	0	0	0	0	0	0	0	0	0	0	0	0	0	0	0	0	0	0	0	0	0	0	0	0	0	0	0	0	0	0	0	0	0	0	0	0	0	0	0
Human Diseases	Cancers	Renal cell carcinoma	Renal cell carcinoma	183	120	268	135	75	407	105	194	36	116	97	801	33	254	186	134	83	967	66	88	46	137	323	550	317	739	379	19	233	469	113	427	275	13	49	249	171	70	18
Organismal Systems	Endocrine System	Renin-angiotensin system	Renin-angiotensin system	0	0	0	0	0	0	0	0	0	0	0	0	0	0	0	0	0	0	0	0	0	0	0	0	5	0	0	0	0	0	0	0	0	0	0	0	0	0	0
Metabolism	Metabolism of Cofactors and Vitamins	Retinol metabolism	Retinol metabolism	428	418	1019	520	776	1300	714	753	669	680	729	782	734	339	754	608	506	865	447	696	763	469	1624	1139	990	660	656	340	1046	2105	1961	3114	973	399	420	321	413	144	161
Human Diseases	Immune System Diseases	Rheumatoid arthritis	Rheumatoid arthritis	0	0	0	0	0	0	0	0	0	0	0	0	0	0	0	0	0	0	0	0	0	0	0	0	0	0	0	0	0	0	0	0	0	0	0	0	0	0	0
Metabolism	Metabolism of Cofactors and Vitamins	Riboflavin metabolism	Riboflavin metabolism	7152	9679	4351	4667	9588	16145	12716	11450	6855	6273	6198	16184	10698	5131	7000	5667	5256	22918	6055	9557	3138	6867	10776	9199	16335	16173	14139	3895	16546	16010	8547	18400	8786	5880	8792	8899	2781	5682	1887
Genetic Information Processing	Translation	Ribosome	Ribosome	88823	102034	65651	71075	119517	212423	140434	128793	76180	90003	84217	191240	116876	63852	99103	84154	64704	273894	72331	112380	62045	87014	142228	128574	197999	196614	214021	42844	194258	232892	119704	205608	126375	64304	93151	93257	40919	61759	20805
Genetic Information Processing	Translation	Ribosome Biogenesis	Ribosome Biogenesis	53973	61158	38486	43340	73523	128381	85555	77835	46466	55414	51193	117537	70538	38585	60903	51395	39429	168318	43944	67636	36203	52894	81269	73486	118786	120535	136661	26394	119215	140146	73199	128163	75597	38907	56079	56005	23719	36469	12744
Genetic Information Processing	Translation	Ribosome biogenesis in eukaryotes	Ribosome biogenesis in eukaryotes	1748	1938	1236	1377	2301	4339	2768	2550	1462	1759	1638	3958	2237	1308	1925	1650	1288	5356	1398	2202	1178	1684	3207	2709	3994	3969	4570	817	3708	5204	2446	3890	2566	1346	1775	1788	947	1171	428
Organismal Systems	Digestive System	Salivary secretion	Salivary secretion	0	0	0	0	0	0	0	0	0	0	0	0	0	0	0	0	0	0	0	0	0	0	0	0	0	0	0	0	0	0	0	0	0	0	0	0	0	0	0
Metabolism	Lipid Metabolism	Secondary bile acid biosynthesis	Secondary bile acid biosynthesis	1332	1206	877	970	1804	2590	1872	1706	1214	1382	1288	2127	1768	1033	1451	1316	928	3406	1044	1474	830	982	1756	1589	2743	2273	2826	736	2698	3281	1846	3248	1538	718	922	1038	725	636	259
Environmental Information Processing	Membrane Transport	Secretion system	Secretion system	35079	43916	26649	27606	49033	82370	63288	56704	33946	34999	34132	81712	50564	25561	38095	32407	27448	108425	29938	48396	25929	36630	61662	51079	79262	80056	86342	17880	80517	86325	49652	93407	51896	31489	41162	39735	16229	26657	9976
Metabolism	Metabolism of Other Amino Acids	Selenocompound metabolism	Selenocompound metabolism	13927	16137	9738	11386	18251	36207	22113	20704	11235	14390	13060	31700	17313	10319	15833	13363	9991	43500	11029	17274	8758	13364	24915	22279	32796	31786	39757	6281	30559	41327	20838	34489	20910	10813	14435	14735	7069	9916	3456
Metabolism	Metabolism of Terpenoids and Polyketides	Sesquiterpenoid biosynthesis	Sesquiterpenoid biosynthesis	0	0	0	0	0	0	0	0	0	0	0	0	0	0	0	0	0	0	0	0	0	0	0	0	0	0	0	0	0	0	0	0	0	0	0	0	0	0	0
Human Diseases	Infectious Diseases	Shigellosis	Shigellosis	0	0	0	0	0	0	0	0	0	0	0	0	0	0	0	0	0	0	0	0	0	0	0	0	0	0	0	0	0	0	0	0	0	0	6	0	0	2	0
Human Diseases	Cancers	Small cell lung cancer	Small cell lung cancer	0	0	0	0	0	1	0	0	0	0	0	0	0	0	0	0	0	0	0	0	0	0	0	0	0	0	0	0	0	0	0	0	0	0	0	0	2	0	0
Metabolism	Lipid Metabolism	Sphingolipid metabolism	Sphingolipid metabolism	4766	5417	2787	3389	7798	10194	8731	9692	4679	5456	5642	7548	7094	3206	5611	4589	3716	12694	4429	6900	2588	4900	7704	6615	12147	8013	7242	2687	10305	12712	6871	13549	5076	3541	4943	4560	2177	3255	1083
Genetic Information Processing	Transcription	Spliceosome	Spliceosome	0	0	0	0	0	0	0	0	0	0	0	0	0	0	0	0	0	0	0	0	0	0	0	0	0	0	0	0	0	0	0	0	0	0	0	0	0	0	0
Human Diseases	Infectious Diseases	Staphylococcus aureus infection	Staphylococcus aureus infection	675	157	3741	1456	244	1609	1042	798	368	331	342	1743	501	692	441	291	357	899	183	581	4152	154	1359	1728	1481	1266	2667	215	431	1311	1793	2154	4544	896	146	291	547	237	262
Metabolism	Carbohydrate Metabolism	Starch and sucrose metabolism	Starch and sucrose metabolism	38870	41663	24233	29358	54746	94683	62501	58520	33110	40758	37983	75211	49603	27053	43705	36951	28376	107610	32069	48825	23750	35365	62465	56533	91005	76845	94831	19229	81835	109591	60769	102583	52941	28861	38884	36377	18026	24543	9139
Metabolism	Lipid Metabolism	Steroid biosynthesis	Steroid biosynthesis	0	0	0	0	1	2	0	0	0	1	0	0	0	0	0	0	0	0	0	0	0	0	0	0	21	0	0	0	0	0	1	0	0	0	0	0	0	0	0
Metabolism	Lipid Metabolism	Steroid hormone biosynthesis	Steroid hormone biosynthesis	10	37	6	24	25	12	48	265	47	70	85	39	55	13	16	11	11	12	21	21	0	50	215	135	94	30	5	3	107	40	433	833	9	19	21	25	23	27	14
Metabolism	Biosynthesis of Other Secondary Metabolites	Stilbenoid, diarylheptanoid and gingerol biosynthesis	Stilbenoid, diarylheptanoid and gingerol biosynthesis	172	119	26	32	74	132	153	221	40	57	59	680	37	233	107	112	58	1005	41	111	19	33	139	89	133	684	413	17	192	63	38	369	72	34	48	248	161	97	23
Metabolism	Biosynthesis of Other Secondary Metabolites	Streptomycin biosynthesis	Streptomycin biosynthesis	9496	11471	6120	7009	14332	23137	16120	16104	8917	10282	10371	20793	13107	6553	11209	9411	7564	29217	8310	13181	5765	9411	15734	15159	24614	20828	20389	4993	21286	25734	13436	24125	12791	7360	10793	10273	4124	6385	2409
Metabolism	Xenobiotics Biodegradation and Metabolism	Styrene degradation	Styrene degradation	162	361	292	383	457	1214	586	1343	250	432	433	1799	327	146	464	299	305	1840	352	438	124	662	892	1390	1370	1531	1129	133	665	1630	822	1484	762	313	209	340	120	272	94
Metabolism	Energy Metabolism	Sulfur metabolism	Sulfur metabolism	8074	9428	6548	7225	11381	20858	13667	13494	7442	8752	8094	17854	11208	5793	9561	8008	6084	24760	6616	10426	5789	8331	13452	12358	19553	17760	21789	4256	18531	23690	12546	22271	11523	6584	8717	8337	3771	5556	2206
Genetic Information Processing	Folding, Sorting and Degradation	Sulfur relay system	Sulfur relay system	9929	12391	6005	6519	13758	22408	17661	16587	9041	9267	9071	21169	14012	7036	10380	8558	7459	29625	8413	13489	5003	8577	13349	12065	21779	21037	22847	5156	20868	22413	10893	22706	11741	8480	11227	11195	3906	7625	2626
Metabolism	Lipid Metabolism	Synthesis and degradation of ketone bodies	Synthesis and degradation of ketone bodies	951	1563	1345	937	1327	2535	2293	2111	886	765	816	4027	1470	916	984	858	954	5112	864	1742	1077	1231	1847	1430	1955	3818	3682	457	2201	2225	1552	3827	2141	1322	1390	1588	635	1117	405
Human Diseases	Immune System Diseases	Systemic lupus erythematosus	Systemic lupus erythematosus	0	0	0	0	0	0	0	0	0	0	0	0	0	0	0	0	0	0	0	0	0	0	0	0	0	0	0	0	0	0	0	0	0	0	0	0	0	0	0
Environmental Information Processing	Signal Transduction	TGF-beta signaling pathway	TGF-beta signaling pathway	0	0	0	0	0	0	0	0	0	0	0	0	0	0	0	0	0	0	0	0	0	0	0	0	0	0	0	0	0	0	0	0	0	0	0	0	0	0	0
Metabolism	Metabolism of Other Amino Acids	Taurine and hypotaurine metabolism	Taurine and hypotaurine metabolism	3694	4168	3625	3128	4601	9171	5738	5649	3135	3401	3262	8285	4789	2797	3862	3240	2489	11728	2771	4317	3499	3396	6192	5418	7809	8393	8672	1715	7952	10230	5734	9998	5188	2619	3667	3958	1835	2526	863
Metabolism	Metabolism of Terpenoids and Polyketides	Terpenoid backbone biosynthesis	Terpenoid backbone biosynthesis	21893	25714	15696	16986	29304	52005	35281	31500	18658	21489	20426	48778	28919	15926	24058	20479	15986	69670	17619	28091	14377	21585	34679	31113	47804	50075	52973	10402	47784	55577	28903	52066	29439	16358	23503	23899	9927	15768	5230
Metabolism	Metabolism of Terpenoids and Polyketides	Tetracycline biosynthesis	Tetracycline biosynthesis	6665	7911	5272	5259	9635	15737	11055	9341	6084	7337	6907	11012	9325	4337	8050	6849	5197	16582	5852	9020	5384	5334	8578	8096	15478	11349	16518	3601	14574	15763	9337	15929	9918	5097	7453	6571	2430	4694	1612
Metabolism	Metabolism of Cofactors and Vitamins	Thiamine metabolism	Thiamine metabolism	19783	23646	12962	14747	27149	47947	33070	29234	17679	19454	18281	40257	27251	13933	21614	17985	14603	57803	16290	25413	10868	18582	30367	26834	44109	40436	46192	10119	43846	53252	24606	43974	26727	15338	21584	21633	8707	13977	4900
Cellular Processes	Cell Communication	Tight junction	Tight junction	0	0	0	0	0	0	0	0	0	0	0	0	0	0	0	0	0	0	0	0	0	0	0	0	0	0	0	0	0	0	0	0	0	0	0	0	0	0	0
Metabolism	Xenobiotics Biodegradation and Metabolism	Toluene degradation	Toluene degradation	987	845	1269	956	1280	2559	1820	3523	1236	1188	1325	3114	1541	728	1107	892	712	3823	894	1053	1149	1598	2927	2458	3392	2888	1539	562	2555	3370	2616	4573	2004	740	812	723	780	360	306
Human Diseases	Infectious Diseases	Toxoplasmosis	Toxoplasmosis	0	0	0	0	0	1	0	0	0	0	0	0	0	0	0	0	0	0	0	0	0	0	0	0	0	0	0	0	0	0	0	0	0	0	0	0	2	0	0
Genetic Information Processing	Transcription	Transcription factors	Transcription factors	71645	87528	45479	50382	99808	166010	125523	106155	64435	69578	67720	148604	97539	50310	77863	65251	54384	212705	60969	97438	44339	64458	106588	91098	157718	151102	173652	35854	153342	174101	103941	194709	96696	59712	81466	77228	29807	53353	17923
Genetic Information Processing	Transcription	Transcription machinery	Transcription machinery	31111	40343	16936	21040	46625	70398	56704	52209	31303	31644	31941	64457	47442	20639	34521	28851	24840	93393	27663	44835	15155	31547	43944	40863	73553	65464	65989	17524	70564	70330	35745	71450	34636	26213	37276	35095	11584	23608	8298
Genetic Information Processing	Translation	Translation factors	Translation factors	20349	23021	14097	15974	27275	48889	31770	29240	17281	20705	19201	42769	26531	14495	22752	19296	14676	61382	16490	25317	12894	19626	31702	29180	44944	44028	49702	9708	44754	53054	26911	46226	27812	14442	21099	20955	8970	13913	4692
Environmental Information Processing	Membrane Transport	Transporters	Transporters	292074	339914	168925	206518	392104	677307	492873	423417	259464	276603	267084	635608	385632	207436	310656	260288	210610	914964	236585	376055	165779	282772	446639	389896	657460	650088	694955	149182	624306	716986	438970	823742	398126	229839	311924	304633	124705	198937	71560
Metabolism	Biosynthesis of Other Secondary Metabolites	Tropane, piperidine and pyridine alkaloid biosynthesis	Tropane, piperidine and pyridine alkaloid biosynthesis	3955	4922	1864	2991	5353	9938	6749	5944	3761	4088	3808	9242	5503	2986	4485	3874	3190	12032	3427	5199	1534	3938	6993	5943	8613	8971	11546	2022	9462	11633	4697	7844	4767	3338	4324	4338	1882	2898	1068
Metabolism	Amino Acid Metabolism	Tryptophan metabolism	Tryptophan metabolism	3861	4726	2453	2966	4918	9787	6663	6528	3315	3764	3570	11048	4814	3067	4277	3507	2931	14697	3248	4992	1878	4052	6792	6138	9093	10737	11032	1773	8514	10812	5784	11185	5912	3134	4097	4551	1986	2955	1015
Human Diseases	Infectious Diseases	Tuberculosis	Tuberculosis	5715	6108	4007	4504	7397	13703	8373	7906	4519	5747	5254	12107	6898	4211	6329	5398	3938	17447	4399	6717	3819	5155	8620	7609	11883	12516	14630	2555	12141	14968	7983	13280	8612	3801	5430	5755	2610	3711	1260
Environmental Information Processing	Signal Transduction	Two-component system	Two-component system	41925	53443	23107	27413	61325	92535	81195	72911	43017	40183	40736	88276	62543	28567	44054	36559	32472	125170	36398	59498	19714	42731	63112	50857	94184	87774	88144	23469	96518	89714	59548	125315	48876	38544	50950	46700	16124	31608	12164
Human Diseases	Metabolic Diseases	Type I diabetes mellitus	Type I diabetes mellitus	1718	1975	1237	1356	2320	4321	2725	2599	1507	1762	1665	3723	2263	1232	1915	1644	1246	5364	1404	2173	1161	1691	2888	2560	3809	3811	4129	838	3770	4842	2792	4742	2495	1235	1799	1803	793	1190	410
Human Diseases	Metabolic Diseases	Type II diabetes mellitus	Type II diabetes mellitus	1733	1962	1444	1621	2542	4875	2849	2657	1497	2015	1897	4004	2242	1268	2217	1882	1436	5569	1516	2342	1207	1904	3073	3030	4036	4060	4792	832	4083	5894	2548	3998	2666	1275	1779	1797	818	1260	401
Metabolism	Amino Acid Metabolism	Tyrosine metabolism	Tyrosine metabolism	12111	14503	13252	11214	16084	30644	19728	18116	10842	12626	11706	27665	15994	9226	13910	11849	9221	37956	10061	15619	13456	11203	21985	18654	27457	27717	35032	5964	27128	35150	20028	32731	20382	9875	12889	12884	6692	8720	3179
Metabolism	Metabolism of Cofactors and Vitamins	Ubiquinone and other terpenoid-quinone biosynthesis	Ubiquinone and other terpenoid-quinone biosynthesis	2271	1089	3444	2339	2046	5604	2865	4380	1754	2279	2137	4864	2592	1912	2226	1825	1115	5513	1196	1652	2810	2253	6265	4920	4746	4436	4342	878	4953	7191	6827	12235	3441	1382	748	1449	1547	781	500
Genetic Information Processing	Folding, Sorting and Degradation	Ubiquitin system	Ubiquitin system	50	9	123	36	5	232	3	92	19	57	48	3	18	71	32	38	4	1	5	2	38	29	379	240	242	11	3	1	17	630	191	41	107	2	8	6	160	1	3
Environmental Information Processing	Signal Transduction	VEGF signaling pathway	VEGF signaling pathway	0	0	0	0	0	0	0	0	0	0	0	0	0	0	0	0	0	0	0	0	0	0	0	0	0	0	0	0	0	0	0	0	0	0	0	0	0	0	0
Metabolism	Amino Acid Metabolism	Valine, leucine and isoleucine biosynthesis	Valine, leucine and isoleucine biosynthesis	26605	31064	14626	20055	39298	65473	44763	41315	25148	29127	27634	48545	38399	17406	31462	26363	20709	69760	23152	35534	13543	25669	41420	37592	64846	48841	57023	14838	59971	73361	39176	67141	36076	20278	29190	26380	10867	17914	6591
Metabolism	Amino Acid Metabolism	Valine, leucine and isoleucine degradation	Valine, leucine and isoleucine degradation	5836	7739	4655	4810	7325	15076	10491	9026	5596	5055	4998	14445	8289	4453	5862	4815	4495	18987	4811	7751	3857	6144	10746	8984	12404	14168	14049	2923	13774	16883	8444	15739	8702	5220	7129	6998	2905	4680	1671
Metabolism	Glycan Biosynthesis and Metabolism	Various types of N-glycan biosynthesis	Various types of N-glycan biosynthesis	0	0	0	0	0	0	0	3	0	5	6	0	0	0	2	3	0	0	0	0	0	0	1	0	0	0	0	0	0	0	0	0	0	0	0	0	0	0	0
Organismal Systems	Circulatory System	Vascular smooth muscle contraction	Vascular smooth muscle contraction	0	0	0	0	0	0	0	0	0	0	0	0	0	0	0	0	0	0	0	0	0	0	0	0	0	0	0	0	0	0	0	0	0	0	0	0	0	0	0
Organismal Systems	Excretory System	Vasopressin-regulated water reabsorption	Vasopressin-regulated water reabsorption	0	0	0	0	0	0	0	0	0	0	0	0	0	0	0	0	0	0	0	0	0	0	0	0	0	0	0	0	0	0	0	0	0	0	0	0	0	0	0
Human Diseases	Infectious Diseases	Vibrio cholerae infection	Vibrio cholerae infection	0	0	0	0	0	0	0	0	0	0	0	0	0	0	0	0	0	0	0	0	0	0	0	0	0	0	0	0	0	0	0	0	0	0	0	0	0	0	0
Human Diseases	Infectious Diseases	Vibrio cholerae pathogenic cycle	Vibrio cholerae pathogenic cycle	3187	3323	1421	2085	3740	7057	4865	3889	2230	2807	2416	6108	3396	2313	3040	2572	2023	8419	2332	3463	1311	2411	4592	3557	5849	6244	8967	1183	6741	7903	4398	7737	3636	2308	3174	3049	1380	2096	667
Human Diseases	Cardiovascular Diseases	Viral myocarditis	Viral myocarditis	0	0	0	0	0	1	0	0	0	0	0	0	0	0	0	0	0	0	0	0	0	0	0	0	0	0	0	0	0	0	0	0	0	0	0	0	2	0	0
Metabolism	Metabolism of Cofactors and Vitamins	Vitamin B6 metabolism	Vitamin B6 metabolism	5475	5816	3557	4534	7650	13257	8451	8562	4747	6056	5837	10389	7016	3796	6457	5527	4038	14473	4443	6859	3811	5622	10269	9152	12736	10587	11430	2612	12156	15357	7967	13247	7705	3821	5367	5249	2586	3433	1249
Environmental Information Processing	Signal Transduction	Wnt signaling pathway	Wnt signaling pathway	0	0	0	0	0	0	0	0	0	0	0	0	0	0	0	0	0	0	0	0	0	0	0	0	0	0	0	0	0	0	0	0	0	0	0	0	0	0	0
Metabolism	Xenobiotics Biodegradation and Metabolism	Xylene degradation	Xylene degradation	2980	3359	2313	2321	3959	7649	4907	3912	2410	3241	2974	5578	3783	2126	3500	2963	2250	7747	2445	3973	2242	2401	4716	4417	6982	5598	8364	1469	5921	8108	4257	6885	4719	2541	3132	2869	1416	2074	756
Metabolism	Metabolism of Terpenoids and Polyketides	Zeatin biosynthesis	Zeatin biosynthesis	1704	1948	1233	1368	2303	4074	2668	2555	1476	1755	1657	3688	2254	1227	1905	1622	1242	5250	1393	2148	1154	1698	2829	2561	3865	3791	4090	817	3840	4495	2268	3871	2388	1224	1768	1781	782	1171	400
Metabolism	Lipid Metabolism	alpha-Linolenic acid metabolism	alpha-Linolenic acid metabolism	7	12	2	5	8	6	13	59	13	18	19	35	15	6	9	6	6	21	5	6	0	7	4	0	46	33	1	6	21	6	7	82	1	6	31	8	21	6	1
Metabolism	Metabolism of Other Amino Acids	beta-Alanine metabolism	beta-Alanine metabolism	6118	7151	3451	4400	8468	15449	10871	9809	5782	5995	5574	12502	8642	4217	6472	5251	4626	17240	5310	7853	2398	5804	9176	8513	14660	12004	14970	3409	14199	17195	6920	13452	6514	5017	6572	6165	2258	4007	1596
Metabolism	Biosynthesis of Other Secondary Metabolites	beta-Lactam resistance	beta-Lactam resistance	1041	858	906	650	1352	1891	1868	1544	1014	736	806	1850	1398	627	834	531	691	2560	822	1162	991	816	1149	1217	2736	1671	1143	703	1919	1731	1400	3241	1471	728	812	762	227	310	247
Genetic Information Processing	Translation	mRNA surveillance pathway	mRNA surveillance pathway	0	0	0	0	0	0	0	0	0	0	0	0	0	0	0	0	0	0	0	0	0	0	0	0	0	0	0	0	0	0	0	0	0	0	0	0	0	0	0
Environmental Information Processing	Signal Transduction	mTOR signaling pathway	mTOR signaling pathway	0	0	0	0	0	0	0	0	0	0	0	0	0	0	0	0	0	0	0	0	0	0	0	0	0	0	0	0	0	0	0	0	0	0	0	0	0	0	0
Cellular Processes	Cell Growth and Death	p53 signaling pathway	p53 signaling pathway	0	0	0	0	0	1	0	0	0	0	0	0	0	0	0	0	0	0	0	0	0	0	0	0	5	0	0	0	0	0	0	0	0	0	0	0	2	0	0
